# Supplementary material
Source: PubMed Central journal article supplement (PMC6592427)
Supplement: NIHMS1014995-supplement-Suppl.pdf [file NIHMS1014995-supplement-Suppl.pdf]

**Cadasides, calcium-dependent acidic lipopeptides from the soil metagenome that are active against multidrug resistant bacteria**

**Authors:** Changsheng Wu<sup>†</sup>, Zhuo Shang<sup>†</sup>, Christophe Lemetre, Melinda A. Ternei, Sean F. Brady<sup>\*</sup>

<sup>†</sup> These authors contributed equally to this work.

**Affiliation:** Laboratory of Genetically Encoded Small Molecules, The Rockefeller University, New York, NY 10065.

**Corresponding Author (\*):** Sean F. Brady

**Contact:** Laboratory of Genetically Encoded Small Molecules, The Rockefeller University  
1230 York Avenue, New York, NY 10065

**Phone:** 212-327-8280

**Fax:** 212-327-8281

**Email:** sbrady@rockefeller.edu

## Table of contents

|                                                                                                                                                              |         |
|--------------------------------------------------------------------------------------------------------------------------------------------------------------|---------|
| Bioassay and labeling methods                                                                                                                                | Page 4  |
| Supplemental Discussion: Structure determination of cadasides A (1) and B (2)                                                                                | Page 7  |
| <b>Table S1.</b> Cadaside biosynthetic gene cluster gene annotations                                                                                         | Page 9  |
| <b>Table S2.</b> <sup>1</sup> H and <sup>13</sup> C NMR data of cadasides A (1) and B (2) in CD <sub>3</sub> OD                                              | Page 10 |
| <b>Table S3.</b> Retention times ( <i>t<sub>R</sub></i> , min) of FDAA derivatives of amino acid (AA) standards and of the hydrolysate of cadaside A (1)     | Page 12 |
| <b>Table S4.</b> Retention times ( <i>t<sub>R</sub></i> , min) for GITC derivatives of L- or D-AMPA standards and of the hydrolysate of cadaside A (1)       | Page 12 |
| <b>Table S5.</b> Spectrum of activity for cadasides (1) and B (2)                                                                                            | Page 13 |
| <b>Table S6.</b> List of PCR primers used in this study                                                                                                      | Page 14 |
| <b>Figure S1.</b> Phylogenetic tree of AD NPSTs identified by eSNaPD analysis                                                                                | Page 15 |
| <b>Figure S2.</b> Comparison of the biosynthetic gene clusters for cadasides and other calcium-dependent antibiotics                                         | Page 16 |
| <b>Figure S3.</b> High-resolution mass spectra of cadasides A (1) and B (2)                                                                                  | Page 17 |
| <b>Figure S4.</b> Structure characterization of cadaside A using 2D NMR correlations                                                                         | Page 18 |
| <b>Figure S5.</b> ESI-CID-MS/MS fragmentation of cadasides A (1) and B (2)                                                                                   | Page 19 |
| <b>Figure S6.</b> Annotated ESI-CID-MS/MS fragments of cadaside A (1)                                                                                        | Page 20 |
| <b>Figure S7.</b> Key 2D NMR correlations for cadaside B (2)                                                                                                 | Page 21 |
| <b>Figure S8.</b> Extracted ion chromatogram of L- and D-FDAA derivatives of the hydrolysate of cadaside A (1)                                               | Page 22 |
| <b>Figure S9.</b> HPLC-DAD analysis of GITC derivatives of cadaside A hydrolysate and L/D-AMPA standards indicated that the presence of D-AMPA in cadaside A | Page 26 |
| <b>Figure S10.</b> Proposed biosynthetic pathway for cadaside A                                                                                              | Page 27 |
| <b>Figure S11.</b> <sup>13</sup> C labelling confirms that the AMPA residue in cadaside originates from thymine                                              | Page 28 |
| <b>Figure S12.</b> Cadaside A does not depolarize the bacterial cell membrane in a DiBAC <sub>4</sub> fluorescence assay                                     | Page 32 |
| <b>Figure S13.</b> Chrome azurol S (CAS) assay for cadaside A, daptomycin and other siderophores                                                             | Page 33 |
| <b>Figure S14.</b> <sup>1</sup> H NMR (600 MHz, CD <sub>3</sub> OD) and UV-vis spectra of cadaside A (1)                                                     | Page 34 |
| <b>Figure S15.</b> <sup>13</sup> C NMR (150 MHz, CD <sub>3</sub> OD) spectrum of cadaside A (1)                                                              | Page 35 |
| <b>Figure S16.</b> <sup>1</sup> H- <sup>13</sup> C HSQC NMR (600 MHz, CD <sub>3</sub> OD) spectrum of cadaside A (1)                                         | Page 36 |
| <b>Figure S17.</b> <sup>1</sup> H- <sup>13</sup> C HMBC NMR (600 MHz, CD <sub>3</sub> OD) spectrum of cadaside A (1)                                         | Page 37 |
| <b>Figure S18.</b> <sup>1</sup> H- <sup>1</sup> H COSY NMR (600 MHz, CD <sub>3</sub> OD) spectrum of cadaside A (1)                                          | Page 38 |
| <b>Figure S19.</b> <sup>1</sup> H- <sup>1</sup> H TOCSY NMR (600 MHz, CD <sub>3</sub> OD) spectrum of cadaside A (1)                                         | Page 39 |
| <b>Figure S20.</b> <sup>1</sup> H- <sup>13</sup> C HSQC-TOCSY NMR (600 MHz, CD <sub>3</sub> OD) spectrum of cadaside A (1)                                   | Page 40 |
| <b>Figure S21.</b> <sup>1</sup> H- <sup>1</sup> H ROESY NMR (600 MHz, CD <sub>3</sub> OD) spectrum of cadaside A (1)                                         | Page 41 |
| <b>Figure S22.</b> <sup>1</sup> H NMR (600 MHz, CD <sub>3</sub> OD) and UV-vis spectra of cadaside B (2)                                                     | Page 42 |
| <b>Figure S23.</b> <sup>13</sup> C NMR (150 MHz, CD <sub>3</sub> OD) spectrum of cadaside B (2)                                                              | Page 43 |
| <b>Figure S24.</b> <sup>1</sup> H- <sup>13</sup> C HSQC NMR (600 MHz, CD <sub>3</sub> OD) spectrum of cadaside B (2)                                         | Page 44 |
| <b>Figure S25.</b> <sup>1</sup> H- <sup>13</sup> C HMBC NMR (600 MHz, CD <sub>3</sub> OD) spectrum of cadaside B (2)                                         | Page 45 |

|                                                                                                                                |         |
|--------------------------------------------------------------------------------------------------------------------------------|---------|
| <b>Figure S26.</b> $^1\text{H}$ - $^1\text{H}$ COSY NMR (600 MHz, $\text{CD}_3\text{OD}$ ) spectrum of cadaside B (2)          | Page 46 |
| <b>Figure S27.</b> $^1\text{H}$ - $^1\text{H}$ TOCSY NMR (600 MHz, $\text{CD}_3\text{OD}$ ) spectrum of cadaside B (2)         | Page 47 |
| <b>Figure S28.</b> $^1\text{H}$ - $^{13}\text{C}$ HSQC-TOCSY NMR (600 MHz, $\text{CD}_3\text{OD}$ ) spectrum of cadaside B (2) | Page 48 |
| <b>Figure S29.</b> $^1\text{H}$ - $^1\text{H}$ ROESY NMR (600 MHz, $\text{CD}_3\text{OD}$ ) spectrum of cadaside B (2)         | Page 49 |
| <b>References</b>                                                                                                              | Page 50 |

## Bioassay and labeling methods

### Microbial susceptibility assays

Cadasides A (**1**) and B (**2**) were assayed in triplicate against 23 bacterial and 3 yeast strains in 96-well microtiter plates using a broth micro-dilution method. Briefly, two-fold serial dilution of **1** and **2** were performed in ddH<sub>2</sub>O to make a concentration gradient ranging from 640 to 0.3 µg/mL. Subsequently, 5 µL of each dilution was added to a row of a 96-well microtiter plate followed by supplementing with 5 µL of 1 M CaCl<sub>2</sub>. For each target microorganism, overnight cultures were diluted 5,000 fold in LB, and 40 µL of the culture dilution was distributed into individual wells. The final test concentration of each compound ranged from 64 to 0.03 µg/mL with a calcium concentration of 100 mM. The microtiter plates were statically incubated at 37 °C for 18 h. The lowest concentration of a compound that inhibits visible growth is recorded as the MIC.

To evaluate the effect of calcium on cadaside activity, a bacterial susceptibility assay using **1** was performed on *S. aureus* NRS100 in the presence of CaCl<sub>2</sub> ranging from 400 mM to 6.25 mM (two-fold serial dilutions). The dose-response curve was plotted using GraphPad Prism 7.0 software (La Jolla, CA). MICs of tetracycline, ampicillin, chloramphenicol, rifamycin, vancomycin, kanamycin and daptomycin were also evaluated by the broth micro-dilution method using *S. aureus* NRS100 and *E. faecium* ATCC 51559 in the presence and absence of 100 mM CaCl<sub>2</sub>. To test the ability of other metal ions to promote cadaside antibiosis, bacterial susceptibility assays of **1** against *S. aureus* NRS100 were performed by supplementing different monovalent (NaCl and KCl), divalent (CaCl<sub>2</sub>, MgCl<sub>2</sub>, BaCl<sub>2</sub>, SrCl<sub>2</sub>, ZnSO<sub>4</sub>, FeSO<sub>4</sub>, MnCl<sub>2</sub>, CuCl<sub>2</sub> and CdCl<sub>2</sub>) and trivalent (FeCl<sub>3</sub> and AuCl<sub>3</sub>) metal ions. We assessed the toxicity of these metal ions alone and then performed cadaside susceptibility assays in the presence of the metals at one quarter of their MIC. In all of our microbial susceptibility assays, calcium chloride was added to autoclaved LB broth as a sterile filtered stock solution.

### Cytotoxicity assay

The cytotoxicity of cadasides A (**1**) and B (**2**) were tested on HeLa, HT29 and NCI-H1299 cells using the MTT (3-(4,5-dimethylthiazol-2-yl)-2,5-diphenyltetrazolium bromide) assay.<sup>1</sup> Briefly, tested cells (2,500 cells/well) were seeded in a 96-well microtiter plate and incubated in DMEM (HeLa, HT29) and RPMI 1640 (NCI-H1299) media (with 10% fetal bovine serum) at 37 °C for 24 h with 5% CO<sub>2</sub>. Cadasides A (**1**) and B (**2**) were added to each well at final concentrations ranging from 128 to 0.5 µg/mL. After a 48 h incubation, the media was removed from each well and 110 µL of MTT solution (10 µL of 5 mg/mL MTT in PBS premixed with 100 µL of DMEM or RPMI 1640) was added. After a 3 h incubation at 37 °C with 5% CO<sub>2</sub>, the solution was aspirated and precipitated formazan crystals were dissolved by addition of 100 µL of solubilization solution (40% DMF, 16% SDS and 2% acetic acid in H<sub>2</sub>O). The absorbance of each well was measured at OD<sub>570</sub> using a microplate reader (Epoch Microplate Spectrophotometer, BioTek). Taxol was used as the positive control. IC<sub>50</sub> values were calculated (Prism 7.0) as the concentration of each compound required for 50% inhibition of cell growth relative to the no compound controls. All experiments were performed in triplicate.

### Membrane leakage and depolarization assays

The effect of cadaside A (**1**) on bacterial cell membrane permeability was evaluated using SYTOX green nucleic acid stain (Thermo Fisher). Briefly, 900 µL of *S. aureus* NRS100 LB culture (OD<sub>600</sub> = 0.35) either supplemented with or without 100 mM CaCl<sub>2</sub> was mixed with 100 µL of SYTOX green (17 µM in DMSO).

Each mixture was kept at room temperature for 5 min, and then distributed into 96-well microtiter plates at 50  $\mu\text{L}$  per well. The initial fluorescence readout of each well was recorded using a SpectraMax M2 (Molecular Devices) with excitation and emission wavelengths at 488 nm and 523 nm, respectively. 50  $\mu\text{L}$  of each test compound [cadaside A, daptomycin (positive control) and vancomycin (negative control)] was added to sets of three wells (final concentration 50  $\mu\text{g}/\text{mL}$ ). The fluorescence of each well was then monitored every 9 seconds for 20 min.

Bacterial cell membrane depolarization assays were conducted in a similar manner as the membrane lysis assays. In short, 900  $\mu\text{L}$  of *S. aureus* NRS100 LB culture ( $\text{OD}_{600} = 0.35$ ) supplemented either with or without 100 mM  $\text{CaCl}_2$  was mixed with 100  $\mu\text{L}$  of DiBAC<sub>4</sub>(3) (bis-(1,3-dibutylbarbituric acid)trimethine oxonol) dye (Thermo Fisher, 20  $\mu\text{g}/\text{mL}$  in DMSO). The resulting mixtures were incubated at room temperature for 5 min before distribution into 96-well microtiter plates at 50  $\mu\text{L}$  per well. The initial fluorescence was acquired with excitation and emission wavelengths at 490 nm and 516 nm, respectively. 50  $\mu\text{L}$  of each test compound [cadaside A, daptomycin (positive control) and vancomycin (negative control)] was subsequently added to sets of three wells (final concentration 50  $\mu\text{g}/\text{mL}$ ). The fluorescence of each well was then monitored at every 9 seconds for 20 min.

### UDP-MurNAc-pentapeptide accumulation assay

The effect of cadaside A (**1**) on *S. aureus* NRS100 cell wall biosynthesis was assessed by looking for the accumulation of the peptidoglycan nucleotide precursor UDP-MurNAc-pentapeptide.<sup>2</sup> Briefly, LB cultures of *S. aureus* NRS100 were grown either with or without 100 mM  $\text{CaCl}_2$  to an  $\text{OD}_{600}$  of 0.6 and then treated with chloramphenicol at a final concentration of 130  $\mu\text{g}/\text{mL}$ . After a 15 min incubation at 37  $^\circ\text{C}$ , 200  $\mu\text{L}$  aliquots of bacterial culture were distributed into 1.7 mL Eppendorf tubes. Antibiotics were then added to approximately 10  $\times$  their MIC (50  $\mu\text{g}/\text{mL}$  for cadaside A, 2.5  $\mu\text{g}/\text{mL}$  for daptomycin and 20  $\mu\text{g}/\text{mL}$  for vancomycin). After 60 min of shaking (250 rpm) at 37  $^\circ\text{C}$ , bacterial cells were collected by centrifugation at 3,200  $\times g$  and then resuspended in 30  $\mu\text{L}$  of ddH<sub>2</sub>O. The suspension was boiled for 15 min after which insoluble cell debris was removed by centrifuge. The resulting supernatant was analyzed by UPLC-DAD-MS (Acquity UPLC BEH C<sub>18</sub>, 2.1  $\times$  50 mm, 1.7  $\mu\text{m}$ , 130  $\text{Å}$ , 0.77 mL/min isocratic elution at 98% H<sub>2</sub>O/MeCN for 2 min, then from 98% to 20% H<sub>2</sub>O/MeCN over 1.4 min, with constant 0.1% formic acid; positive and negative ionization modes). Using masses of 1150  $[\text{M} + \text{H}]^+$  or 1148  $[\text{M} - \text{H}]^-$ , the presence of UDP-MurNAc-pentapeptide was tracked in the total ion chromatograms generated in these analyses.

### Chrome azurol S (CAS) assay

The iron binding ability of the cadasides was measured using the CAS assay.<sup>3,4</sup> Briefly, 7.5 mL of 2 mM aqueous CAS solution and 1.5 mL of 1 mM  $\text{FeCl}_3$  solution (prepared in 10 mM HCl) were added to 25 mL of hexadecyltrimethylammonium bromide (CTAB) solution (0.876 mg/mL). This CAS-Fe(III)-CTAB solution was mixed with 50 mL of 2-(*N*-morpholino)ethanesulfonic acid (MES) buffer (195.2 mg/mL, pH 5.6) and ddH<sub>2</sub>O was used to adjust the final volume to 100 mL. For the CAS assay, 50  $\mu\text{L}$  of the assay solution was distributed into a 96-well microtiter plate. Two-fold serial dilutions of cadaside A (**1**) as well as the known iron chelators deferoxamine mesylate, pyoverdines, iron-free ferrichrome, disodium EDTA, and citric acid were prepared in ddH<sub>2</sub>O. 50  $\mu\text{L}$  of these dilution series were added to distinct microtiter plate wells to give final concentrations

ranging from 1.28 mM to 1.25  $\mu$ M. After incubation at 37 °C for 3 h, the color change in each well was measured at 630 nm.

### **<sup>13</sup>CH<sub>3</sub>-thymine labelling**

*S. albus* J1074 containing BAC-DFD0097-157/431/2621 was inoculated into 1 mL of R5A broth supplemented with 3.5 mg of <sup>13</sup>CH<sub>3</sub>-thymine in a 24-well Micro-Flask (Applikon Biotechnology). A culture supplemented with the same amount of unlabeled thymine was used as the negative control. Eight-day old cultures (250 rpm, 30 °C) were extracted with HP-20 resin and the resin was subsequently eluted by methanol. The methanol eluate was dried *in vacuo* and the extract was dissolved in 50  $\mu$ L of 50% aqueous methanol. HPLC-HRMS-MS/MS analysis was performed on a Thermo Scientific LTQ Orbitrap XL Hybrid Ion Trap-Orbitrap Mass Spectrometer connected to a Dionex UltiMate 3000 HPLC system. The HPLC condition was set as follows: Thermo Acclaim 120 RP-C<sub>18</sub> column, 2.1  $\times$  150 mm, 5  $\mu$ m, 0.2 mL/min gradient elution from 95% to 40% H<sub>2</sub>O/MeCN over 20 min, then 100% MeCN for 5 min, and finally 95% H<sub>2</sub>O/MeOH for 5 min, with constant 0.1% formic acid. The ESI source parameters were set as follows: capillary temperature 350 °C, sheath gas flow 8 units, positive polarity, and source voltage 4.0 kV. For the targeted CID-FT MS-MS spectra, the peak containing a single <sup>13</sup>C atom (*m/z* 780.34) among the [M + 2H]<sup>2+</sup> isotope peak cluster for cadaside A (**1**) was selected for fragmentation under a normalized collision energy of 35%. The enrichment of isotope peaks was analyzed using Thermo Xcalibur 2.0.7 software and the ratios were calculated manually.

## Structure determination of cadasides A (1) and B (2)

Cadaside A (**1**, 8.5 mg) was isolated as a brown powder from *S. albus*-BAC-DFD0097-157/431/262 R5A culture broth (25 L). HPLC-HRESI(+)MS analysis of **1** returned a protonated ion at  $m/z$  1558.6796 [ $M + H$ ]<sup>+</sup> (calcd for C<sub>69</sub>H<sub>100</sub>N<sub>13</sub>O<sub>28</sub><sup>+</sup>, 1558.6795), suggesting a molecular formula of C<sub>69</sub>H<sub>99</sub>N<sub>13</sub>O<sub>28</sub> (Figure S2). 2D NMR (COSY, TOCSY, HSQC, HMBC, and HSQC-TOCSY) analyses revealed that cadaside A is comprised of an unsaturated fatty acid chain and 13 amino acid residues (Figure S3, A). The lipid chain was determined to be 8-methyldeca-2,4-dienoic acid (MDDA) with two conjugated double bonds at *cis*- $\Delta^2$  and *trans*- $\Delta^4$  on the basis of diagnostic coupling constants ( $J_{2,3} = 11.4$  Hz and  $J_{4,5} = 15.3$  Hz) and NOE correlations between H-2/H-3 and H-3/H-5 (Figure S3, B). The 13 amino acid residues in **1** were characterized as 3-amino-2-methylpropionic acid (AMPA), glycine (2  $\times$  Gly), glutamic acid (2  $\times$  Glu), tyrosine (Tyr), threonine (Thr), isoleucine (Ile), aspartic acid (Asp),  $\beta$ -hydroxyaspartic acid ( $\beta$ -hyAsp), proline (Pro), 4-hydroxy-glutamic acid ( $\gamma$ -hyGlu), and sarcosine (Sar) (Figure S3, B). The rare AMPA residue was first suggested by a COSY/TOCSY spin system consisting of a methyl doublet at  $\delta_H$  1.14 (d,  $J = 6.9$  Hz, H<sub>3-4</sub>), a methine at  $\delta_H$  2.66 (m, H-2), and a *N*-bearing inequivalent methylene at  $\delta_H$  3.26 (dd,  $J = 13.4, 8.4$  Hz, H-3a) and  $\delta_H$  3.43 (dd,  $J = 13.4, 5.7$  Hz, H-3b). The HMBC correlations from H<sub>3-4</sub> to C-3 ( $\delta_C$  43.6) and the amide carbonyl group ( $\delta_C$  178.2) further supported the presence of an AMPA residue. The hydroxyl group on the hyGlu residue was located at the C-4 ( $\delta_C$  69.1) based on sequential COSY correlations from  $\delta_H$  5.14 (H-2) to  $\delta_H$  1.93/2.30 (H<sub>2-3</sub>) then to  $\delta_H$  4.16 (H-2). The assignments of <sup>1</sup>H and <sup>13</sup>C NMR data of the lipid chain and each amino acid residue in **1** and **2** were summarized in Table S2.

The amino acid sequences of **1** and **2** were first predicted by bioinformatics, and then established conclusively by 2D NMR and tandem mass spectrometry. Specifically, three large structural pieces of **1**, including MDDA-AMPA<sub>1</sub>-Gly<sub>2</sub>, Glu<sub>3</sub>-Tyr<sub>4</sub>-Thr<sub>5</sub>-Ile<sub>6</sub>, and Pro<sub>9</sub>-Gly<sub>10</sub>-Glu<sub>11</sub>- $\gamma$ -hyGlu<sub>12</sub>-Sar<sub>13</sub> were built by inspecting HMBC correlations from  $\alpha$  protons to carbonyl carbon of the previous amino acid residue (Figure S3, B). The connection between  $\gamma$ -hyGlu<sub>12</sub> and Sar<sub>13</sub> was demonstrated by the HMBC correlation from *N*-CH<sub>3</sub> to the carbonyl carbon of  $\gamma$ -hyGlu<sub>12</sub> as well as a ROESY cross peak between *N*-CH<sub>3</sub> and H-2/H-3 of  $\gamma$ -hyGlu<sub>12</sub> (Figure S3, B). Due to the lack of inter-residue HMBC signals for Asp<sub>7</sub> and  $\beta$ -hyAsp<sub>8</sub>, their connections to other amino acid residues remained uncertain at that stage. Cde NRPSs contain a total of 13 adenylation (AD) domains, perfectly matching the 13 amino acids analytically predicted to be present in the cadasides (Figure S9). The bioinformatic analysis of AD domain specificities indicated a predicted peptide sequence of: lipid-X<sub>1</sub>-Gly<sub>2</sub>-Asp<sub>3</sub>-Tyr<sub>4</sub>-Thr<sub>5</sub>-Val<sub>6</sub>-Asp<sub>7</sub>-Asp<sub>8</sub>-Pro<sub>9</sub>-Gly<sub>10</sub>-Asp<sub>11</sub>-Asp<sub>12</sub>-Sar<sub>13</sub>. By comparing this theoretical peptide sequence with the experimentally NMR-resolved partial structures we connected the five established structural pieces (Figure S3, B) and proposed a lipidated peptide sequence of: MDDA-AMPA<sub>1</sub>-Gly<sub>2</sub>-Glu<sub>3</sub>-Tyr<sub>4</sub>-Thr<sub>5</sub>-Ile<sub>6</sub>-Asp<sub>7</sub>- $\beta$ -hyAsp<sub>8</sub>-Pro<sub>9</sub>-Gly<sub>10</sub>-Glu<sub>11</sub>- $\gamma$ -hyGlu<sub>12</sub>-Sar<sub>13</sub>. To further corroborate this deduced structure, an ESI-MS/MS experiment was conducted to generate the peptide fragment ions of **1** (Figure S4). The structural annotation of observed fragment ion pairs is elaborated in Figure S5. Fragment ion pairs that were critical to unambiguously elucidate the planar structure of cadaside A (**1**) were as follows. Collision-induced dissociation (CID) fragmentation of the selected precursor ion 779.84 [ $M + 2H$ ]<sup>2+</sup> afforded a set of complementary ion pairs ( $m/z$  250/1309,  $m/z$  307/1252,  $m/z$  436/1123 and  $m/z$  599/960 (Figure S5) that allowed us to unequivocally define the following substructure: MDDA-AMPA<sub>1</sub>-Gly<sub>2</sub>-Glu<sub>3</sub>-Tyr<sub>4</sub>. Three additional pairs of fragment ions,  $m/z$  884/675,  $m/z$  999/560,  $m/z$  1130/429, not only demonstrated the linkage of Ile<sub>6</sub>-Asp<sub>7</sub>- $\beta$ -hyAsp<sub>8</sub>-Pro<sub>9</sub>, but also revealed the ring closure between Thr<sub>5</sub> and Sar<sub>13</sub> through an ester bond.

Cadaside B (**2**, 5.0 mg) was co-isolated with cadaside A. HPLC-HRESI(+)MS analysis of **2** revealed a protonated ion at  $m/z$  1544.6633  $[M + H]^+$  (calcd for  $C_{68}H_{98}N_{13}O_{28}^+$ , 1544.6639), which is indicative of the loss of  $CH_2$  compared to **1**. Analysis of the MS/MS data from **1** and **2** (Figure S4) revealed this difference was located in the lipid chain. Detailed inspection of 1D and 2D NMR data (Table S2) permitted the assignment of the lipid in cadaside B (**2**) as (2*Z*,4*E*)-8-methylnona-2,4-dienoic acid (MNDA). By comparison of NMR and MS/MS data the peptide substructure of **2** proved to be identical to that of **1**. Therefore, the planar structure of cadaside B (**2**) was assigned as shown in Figure S6.

The absolute configurations of the amino acid residues in **1** and **2** were determined by chemical derivatization with 1-fluoro-2,4-dinitrophenyl-5-L-alanine amide (L-FDAA), 1-fluoro-2,4-dinitrophenyl-5-D-alanine amide (D-FDAA), and 2,3,4,6-tetra-*O*-acetyl- $\beta$ -D-glucopyranosyl isothiocyanate (GITC). Through the comparison of retention times of L-FDAA and D-FDAA derivatives of cadaside hydrolysate with those of amino acid standards, we elucidated the absolute configuration of each amino acid residue as shown in Table S3. Specifically, Glu<sub>3</sub>, Glu<sub>11</sub> and Ile<sub>6</sub> were assigned to be D-amino acids, while Tyr<sub>4</sub>, Thr<sub>5</sub>, Asp<sub>7</sub>,  $\beta$ -hyAsp<sub>8</sub>, Pro<sub>9</sub> and  $\gamma$ -hyGlu<sub>12</sub> were found to be in L-configurations. The  $\beta$ -CH in  $\beta$ -hyAsp<sub>8</sub> and  $\gamma$ -CH in  $\gamma$ -hyGlu<sub>12</sub> were also determined to be *R* by comparison with FDAA derivatives of amino acid standards (Figure S8). However, L- and D-FDAA derivatives of AMPA could not be resolved under our column and elution conditions, therefore we sought to use GITC to derivatize AMPA. HPLC profile comparison of GITC derivatives of cadaside hydrolysate with those of L- and D-AMPA standards indicated the presence of D-AMPA in the cadasides (Table S4 and Figure S8).



**Table S1.** Cadaside biosynthetic gene cluster gene annotations (GeneBank Accession NO. MK060022).<sup>a</sup>

| ORF | Gene size (bp) | Gene name   | Proposed function            | NCBI similarity                                                                                                                      | ID% |
|-----|----------------|-------------|------------------------------|--------------------------------------------------------------------------------------------------------------------------------------|-----|
| 1   | 1266           | <i>cdeA</i> | AMPA biosynthesis            | cytochrome P450 [ <i>Streptomyces rhizosphaericus</i> ]; WP_086884385.1                                                              | 85% |
| 2   | 807            | <i>cdeB</i> | AMPA biosynthesis            | alpha/beta hydrolase [ <i>Streptomyces rhizosphaericus</i> ]; WP_086884384.1                                                         | 86% |
| 3   | 849            | <i>cdeC</i> | Transport                    | ABC transporter permease [ <i>Streptomyces rhizosphaericus</i> ]; WP_086884383.1                                                     | 76% |
| 4   | 939            | <i>cdeD</i> | Transport                    | daunorubicin/doxorubicin resistance ABC transporter ATP-binding protein DrrA [ <i>Streptomyces rhizosphaericus</i> ]; WP_086884382.1 | 76% |
| 5   | 1761           | <i>cdeE</i> | Acyl-CoA/AMP synthesis       | acyl-CoA synthase [uncultured bacterium esnapd2]; WP_086884379.1                                                                     | 74% |
| 6   | 1704           | <i>cdeF</i> | Desaturation of acyl chain   | acyl-CoA dehydrogenase [ <i>Streptomyces</i> sp. MBT76]; WP_107105521.1                                                              | 69% |
| 7   | 1737           | <i>cdeG</i> | Desaturation of acyl chain   | acyl-CoA dehydrogenase [ <i>Streptomyces glaucescens</i> ]; WP_086732724.1                                                           | 71% |
| 8   | 291            | <i>cdeH</i> | Attachment of acyl chain     | acyl carrier protein [ <i>Streptomyces rhizosphaericus</i> ]; WP_086884377.1                                                         | 70% |
| 9   | 21714          | <i>cdeI</i> | NRPS                         | non-ribosomal peptide synthetase [ <i>Streptomyces ambofaciens</i> ]; WP_079030454.1                                                 | 51% |
| 10  | 17127          | <i>cdeJ</i> | NRPS                         | non-ribosomal peptide synthetase [ <i>Streptomyces ambofaciens</i> ]; WP_079155636.1                                                 | 51% |
| 11  | 8355           | <i>cdeK</i> | NRPS                         | non-ribosomal peptide synthetase [ <i>Streptomyces</i> sp. CB02923] WP_073766514.1                                                   | 50% |
| 12  | 222            | <i>cdeL</i> | Unknown                      | mbtH-like protein [ <i>Streptomyces varsoviensis</i> ]; KOG43121.1                                                                   | 83% |
| 13  | 732            | <i>cdeM</i> | Unknown                      | phosphatase PAP2 family protein [ <i>Streptomyces rhizosphaericus</i> ]; WP_086879388.1                                              | 68% |
| 14  | 975            | <i>cdeN</i> | Hydroxylation of Asp and Glu | alpha-ketoglutarate-dependent taurine dioxygenase [ <i>Plantactinospora</i> sp. CNZ320]; PKV26967.1                                  | 69% |
| 15  | 1062           | <i>cdeO</i> | D-Ile biosynthesis           | branched-chain amino acid aminotransferase [ <i>Streptomyces rhizosphaericus</i> ]; WP_086879374.1                                   | 76% |
| 16  | 387            | <i>cdeP</i> | D-Ile biosynthesis           | ketosteroid isomerase [ <i>Streptomyces</i> sp. DvalAA-43]; WP_093539559.1                                                           | 65% |
| 17  | 696            | <i>cdeQ</i> | Unknown                      | phosphatase PAP2 family protein [ <i>Streptomyces rhizosphaericus</i> ]; WP_086879389.1                                              | 69% |
| 18  | 1455           | <i>cdeR</i> | Regulation                   | sensor histidine kinase [ <i>Streptomyces</i> sp. MH60]; WP_104633320.1                                                              | 64% |
| 19  | 639            | <i>cdeS</i> | Regulation                   | DNA-binding response regulator [ <i>Streptomyces rhizosphaericus</i> ]; WP_086879390.1                                               | 85% |
| 20  | 1131           | <i>cdeT</i> | AMPA biosynthesis            | succinate-semialdehyde dehydrogenase [ <i>Streptomyces scopuliridis</i> RB72]; PVE07583.1                                            | 76% |

<sup>a</sup> The upstream boundary of *cde* gene cluster was conservatively defined as being the gene directly adjacent to another NRPS system upstream of the *cde* NRPS genes. This second set of NRPS genes is not closely related to genes found in any calcium-dependent antibiotic biosynthetic gene cluster. The downstream edge of the *cde* cluster was defined by the appearance of genes predicted to be involved in primary metabolism instead of secondary metabolism.

**Table S2.** <sup>1</sup>H and <sup>13</sup>C NMR data of cadasides A (1) and B (2) in CD<sub>3</sub>OD

| Pos. | cadaside A (1)                              |                                               | cadaside B (2)                              |                                               |
|------|---------------------------------------------|-----------------------------------------------|---------------------------------------------|-----------------------------------------------|
|      | $\delta_C$ , type                           | $\delta_H$ , mult. ( <i>J</i> in Hz)          | $\delta_C$ , type                           | $\delta_H$ , mult. ( <i>J</i> in Hz)          |
|      | <b>8-methyldeca-2,4-dienoic acid (MDDA)</b> |                                               | <b>8-methylnona-2,4-dienoic acid (MNDA)</b> |                                               |
| 1    | 169.3, C                                    | –                                             | 169.3, C                                    | –                                             |
| 2    | 119.4, CH                                   | 5.62, d (11.4)                                | 119.4, CH                                   | 5.62, d (11.3)                                |
| 3    | 143.0, CH                                   | 6.40, t (11.4)                                | 143.0, CH                                   | 6.40, t (11.3)                                |
| 4    | 128.3, CH                                   | 7.41, dd (15.3, 11.4)                         | 128.4, CH                                   | 7.41, dd (15.3, 11.3)                         |
| 5    | 144.7, CH                                   | 5.99, d (15.3, 7.0)                           | 144.6, CH                                   | 5.99, d (15.3, 7.0)                           |
| 6    | 31.4, CH <sub>2</sub>                       | 2.16; 2.21                                    | 31.9, CH <sub>2</sub>                       | 2.16; 2.21                                    |
| 7    | 36.9, CH <sub>2</sub>                       | 1.26; 1.47                                    | 39.3, CH <sub>2</sub>                       | 1.33, m                                       |
| 8    | 35.3, CH                                    | 1.37                                          | 28.8, CH                                    | 1.58, m                                       |
| 9    | 11.7, CH <sub>3</sub>                       | 0.88                                          | 22.8, CH <sub>3</sub>                       | 0.91                                          |
| 10   | 30.4, CH <sub>2</sub>                       | 1.18; 1.37                                    | 22.8, CH <sub>3</sub>                       | 0.91                                          |
| 11   | 19.4, CH <sub>3</sub>                       | 0.89                                          | –                                           | –                                             |
|      | <b>AMPA-1</b>                               |                                               | <b>AMPA-1</b>                               |                                               |
| 1    | 178.2, C                                    | –                                             | 178.2, C                                    | –                                             |
| 2    | 41.9, CH                                    | 2.66, m                                       | 41.9, CH                                    | 2.66, m                                       |
| 3    | 43.6, CH <sub>2</sub>                       | 3.26, dd (13.4, 8.4);<br>3.43, dd (13.4, 5.7) | 43.6, CH <sub>2</sub>                       | 3.26, dd (13.4, 8.4);<br>3.42, dd (13.4, 5.7) |
| 4    | 15.7, CH <sub>3</sub>                       | 1.14, d (6.9)                                 | 15.7, CH <sub>3</sub>                       | 1.14, d (6.9)                                 |
|      | <b>Gly-2</b>                                |                                               | <b>Gly-2</b>                                |                                               |
| 1    | 171.6, C                                    | –                                             | 171.6, C                                    | –                                             |
| 2    | 43.9, CH <sub>2</sub>                       | 3.80, d (16.5); 3.94, d (16.5)                | 43.9, CH <sub>2</sub>                       | 3.79, d (16.6); 3.93, d (16.6)                |
|      | <b>Glu-3</b>                                |                                               | <b>Glu-3</b>                                |                                               |
| 1    | 174.2, C                                    | –                                             | 174.0, C                                    | –                                             |
| 2    | 54.9, CH                                    | 4.33                                          | 54.8, CH                                    | 4.33                                          |
| 3    | 27.9, CH <sub>2</sub>                       | 2.15                                          | 27.9, CH <sub>2</sub>                       | 2.15                                          |
| 4    | 31.6, CH <sub>2</sub>                       | 2.38, dt (16.4, 7.8);<br>2.49, dt (16.4, 7.1) | 31.5, CH <sub>2</sub>                       | 2.38, dt (16.6, 7.9);<br>2.48, dt (16.6, 7.2) |
| 5    | 176.8, C                                    | –                                             | 176.8, C                                    | –                                             |
|      | <b>Tyr-4</b>                                |                                               | <b>Tyr-4</b>                                |                                               |
| 1    | 174.4, C                                    | –                                             | 174.4, C                                    | –                                             |
| 2    | 56.5, CH                                    | 4.76, br s                                    | 56.5, CH                                    | 4.75, br s                                    |
| 3    | 37.8, CH <sub>2</sub>                       | 2.91; 3.18                                    | 37.8, CH <sub>2</sub>                       | 2.91; 3.18                                    |
| 4    | 129.0, C                                    | –                                             | 129.0, C                                    | –                                             |
| 5/9  | 131.4, CH                                   | 7.10, d (8.1)                                 | 131.4, CH                                   | 7.10, d (8.1)                                 |
| 6/8  | 116.4, CH                                   | 6.70, d (8.1)                                 | 116.4, CH                                   | 6.70, d (8.1)                                 |
| 7    | 157.4, C                                    | –                                             | 157.4, C                                    | –                                             |
|      | <b>Thr-5</b>                                |                                               | <b>Thr-5</b>                                |                                               |
| 1    | 171.2, C                                    | –                                             | 171.3, C                                    | –                                             |
| 2    | 58.7, CH                                    | 4.58, br s                                    | 58.6, CH                                    | 4.58, br s                                    |
| 3    | 71.8, CH                                    | 5.50, br s                                    | 71.7, CH                                    | 5.51, br s                                    |
| 4    | 17.1, CH <sub>3</sub>                       | 1.28, d (6.6)                                 | 17.2, CH <sub>3</sub>                       | 1.27, d (6.5)                                 |
|      | <b>Ile-6</b>                                |                                               | <b>Ile-6</b>                                |                                               |
| 1    | 173.0, C                                    | –                                             | 173.0, C                                    | –                                             |
| 2    | 59.2, CH                                    | 4.27, d (6.9)                                 | 59.2, CH                                    | 4.25, d (6.9)                                 |
| 3    | 38.1, CH                                    | 1.87                                          | 38.1, CH                                    | 1.87                                          |
| 4    | 26.0, CH <sub>2</sub>                       | 1.13; 1.52                                    | 26.0, CH <sub>2</sub>                       | 1.14; 1.52                                    |

|                           |                       |                                |                       |                                |
|---------------------------|-----------------------|--------------------------------|-----------------------|--------------------------------|
| 5                         | 11.7, CH <sub>3</sub> | 0.89                           | 11.7, CH <sub>3</sub> | 0.89                           |
| 6                         | 15.8, CH <sub>3</sub> | 0.93, d (6.9)                  | 15.8, CH <sub>3</sub> | 0.93                           |
|                           | <b>Asp-7</b>          |                                | <b>Asp-7</b>          |                                |
| 1                         | 172.5, C              | –                              | 172.6, C              | –                              |
| 2                         | 51.2, CH              | 5.01, br s                     | 51.2, CH              | 4.99, br s                     |
| 3                         | 36.9, CH <sub>2</sub> | 2.70; 2.88                     | 36.9, CH <sub>2</sub> | 2.71; 2.87                     |
| 4                         | 174.2, C              | –                              | 174.4, C              | –                              |
|                           | <b>β-HyAsp-8</b>      |                                | <b>β-HyAsp-8</b>      |                                |
| 1                         | 171.5, C              | –                              | 171.5, C              | –                              |
| 2                         | 74.0, CH              | 4.38, d (4.4)                  | 74.1, CH              | 4.36, d (4.4)                  |
| 3                         | 55.5, CH              | 4.95                           | 55.6, CH              | 4.93                           |
| 4                         | 177.1, C              | –                              | 177.1, C              | –                              |
|                           | <b>Pro-9</b>          |                                | <b>Pro-9</b>          |                                |
| 1                         | 174.9, C              | –                              | 174.9, C              | –                              |
| 2                         | 63.5, CH              | 4.30                           | 63.5, CH              | 4.30                           |
| 3                         | 30.4, CH <sub>2</sub> | 1.83; 2.21                     | 30.4, CH <sub>2</sub> | 1.82; 2.21                     |
| 4                         | 26.3, CH <sub>2</sub> | 1.90; 2.01, m                  | 26.3, CH <sub>2</sub> | 1.88, m; 2.00, m               |
| 5                         | 49.3, CH <sub>2</sub> | 3.79; 3.95                     | 49.3, CH <sub>2</sub> | 3.77; 3.95                     |
|                           | <b>Gly-10</b>         |                                | <b>Gly-10</b>         |                                |
| 1                         | 172.5, C              | –                              | 172.5, C              | –                              |
| 2                         | 43.3, CH <sub>2</sub> | 3.71, d (16.9); 4.18, d (16.9) | 43.3, CH <sub>2</sub> | 3.70, d (17.1); 4.18, d (17.1) |
|                           | <b>Glu-11</b>         |                                | <b>Glu-11</b>         |                                |
| 1                         | 173.5, C              | –                              | 173.5, C              | –                              |
| 2                         | 53.9, CH              | 4.47, br s                     | 53.9, CH              | 4.47, br s                     |
| 3                         | 28.6, CH <sub>2</sub> | 1.80; 2.00                     | 28.7, CH <sub>2</sub> | 1.80; 2.01                     |
| 4                         | 31.0, CH <sub>2</sub> | 2.16; 2.21                     | 31.1, CH <sub>2</sub> | 2.16; 2.21                     |
| 5                         | 176.6, C              | –                              | 176.7, C              | –                              |
|                           | <b>γ-HyGlu-12</b>     |                                | <b>γ-HyGlu-12</b>     |                                |
| 1                         | 173.9, C              | –                              | 174.0, C              | –                              |
| 2                         | 47.7, CH              | 5.14, br s                     | 47.8, CH              | 5.12, br s                     |
| 3                         | 37.4, CH <sub>2</sub> | 1.93; 2.30, m                  | 37.4, CH <sub>2</sub> | 1.93; 2.30, m                  |
| 4                         | 69.1, CH              | 4.16                           | 69.4, CH              | 4.12, br s                     |
| 5                         | 178.2, C              | –                              | 178.4, C              | –                              |
|                           | <b>Sar-13</b>         |                                | <b>Sar-13</b>         |                                |
| 1                         | 169.7, C              | –                              | 169.7, C              | –                              |
| 2                         | 51.2, CH <sub>2</sub> | 3.64, d (16.9); 4.67, d (16.9) | 51.2, CH <sub>2</sub> | 3.62, d (16.3); 4.67, d (16.3) |
| <i>N</i> -CH <sub>3</sub> | 37.3, CH <sub>3</sub> | 3.22, s                        | 37.4, CH <sub>3</sub> | 3.22, s                        |

<sup>1</sup>H and <sup>13</sup>C NMR were obtained at 600 and 150 MHz, respectively. The assignments of overlapping <sup>1</sup>H NMR signals were supported by HSQC, HMBC, TOCSY and HSQC-TOCSY. The peak multiplicity and coupling constants are presented for non-overlapping signals only.

**Table S3.** Retention times ( $t_R$ , min) of FDAA derivatives of amino acid (AA) standards and of the hydrolysate of cadaside A (**1**)

| AA               | MW  | AA standards                                                                                                                                                             |                                                        | hydrolysate of <b>1</b>    |                            |                        |
|------------------|-----|--------------------------------------------------------------------------------------------------------------------------------------------------------------------------|--------------------------------------------------------|----------------------------|----------------------------|------------------------|
|                  |     | $t_R$ (L-AA-L-FDAA) or<br>$t_R$ (D-AA-D-FDAA)<br>(min)                                                                                                                   | $t_R$ (L-AA-D-FDAA) or<br>$t_R$ (D-AA-L-FDAA)<br>(min) | $t_R$ (AA-L-FDAA)<br>(min) | $t_R$ (AA-D-FDAA)<br>(min) | L or D                 |
| AMPA             | 355 | 16.60                                                                                                                                                                    | 16.60                                                  | 16.60                      | 16.60                      | NA                     |
| Glu              | 399 | 11.39                                                                                                                                                                    | 13.16                                                  | 13.20                      | 11.42                      | D                      |
| Tyr              | 433 | 17.06                                                                                                                                                                    | 19.49                                                  | 17.11                      | 19.52                      | L                      |
| Thr              | 371 | 9.32                                                                                                                                                                     | 13.45                                                  | 9.41                       | 13.43                      | L                      |
| <i>allo</i> -Thr | 371 | 9.61                                                                                                                                                                     | 11.27                                                  | –                          | –                          | –                      |
| Ile              | 383 | 23.80                                                                                                                                                                    | 28.59                                                  | 28.59                      | 23.80                      | D                      |
| <i>allo</i> -Ile | 383 | 23.80                                                                                                                                                                    | 28.59                                                  | –                          | –                          | –                      |
| Asp              | 385 | 9.67                                                                                                                                                                     | 11.05                                                  | 9.78                       | 11.03                      | L                      |
| Pro              | 367 | 14.49                                                                                                                                                                    | 15.97                                                  | 14.56                      | 15.98                      | L                      |
| $\beta$ -hyAsp   | 401 | 8.28 (2 <i>S</i> , 3 <i>R</i> , L-FDAA)<br>7.11 (2 <i>S</i> , 3 <i>R</i> , D-FDAA)<br>5.14 (2 <i>S</i> , 3 <i>S</i> , L-FDAA)<br>4.80 (2 <i>S</i> , 3 <i>S</i> , D-FDAA) |                                                        | 8.30                       | 7.10                       | 2 <i>S</i> ,3 <i>R</i> |
| $\gamma$ -hyGlu  | 415 | 8.28 (2 <i>S</i> , 4 <i>R</i> , L-FDAA)<br>7.03 (2 <i>S</i> , 4 <i>R</i> , D-FDAA)<br>6.77 (2 <i>S</i> , 4 <i>S</i> , L-FDAA)<br>7.12 (2 <i>S</i> , 4 <i>S</i> , D-FDAA) |                                                        | 8.30                       | 7.03                       | 2 <i>S</i> ,4 <i>R</i> |

0.2 mL/min gradient elution from 80% to 40% H<sub>2</sub>O/MeCN with 0.1% formic acid over 40 min on Thermo Acclaim 120 RP-C<sub>18</sub> column, 2.1 × 150 mm, 5 μm; ESI-HRMS on the positive ion mode.

**Table S4.** Retention times ( $t_R$ , min) for GITC derivatives of L- or D-AMPA standards and of the hydrolysate of cadaside A (**1**)

| AA     | AA standards            |                         | hydrolysate of <b>1</b> |
|--------|-------------------------|-------------------------|-------------------------|
|        | $t_R$ (L-AA-GITC) (min) | $t_R$ (D-AA-GITC) (min) | $t_R$ (AA-GITC) (min)   |
| L-AMPA | 40.31                   | –                       | –                       |
| D-AMPA | –                       | 38.85                   | 38.92                   |

1 mL/min isocratic elution at 80% H<sub>2</sub>O/MeCN with 0.1% formic acid over 60 min on XBridge RP-C<sub>18</sub> column, 2.1 × 150 mm, 5 μm, UV-vis detection at 254 nm.

**Table S5.** Spectrum of activity for cadasides (1) and B (2).

| Strains                                   | Gram + or – | Acquired resistance                                                                | MIC ( $\mu\text{g/mL}$ ) |            |            |
|-------------------------------------------|-------------|------------------------------------------------------------------------------------|--------------------------|------------|------------|
|                                           |             |                                                                                    | cadaside A               | cadaside B | daptomycin |
| <i>Staphylococcus aureus</i> RN4220       | +           |                                                                                    | 4                        | 4          | 0.25       |
| <i>Staphylococcus aureus</i> USA300       | +           | methicillin                                                                        | 8                        | 16         | 0.5        |
| <i>Staphylococcus aureus</i> NRS100       | +           | oxacillin,<br>tetracycline                                                         | 1-2                      | 2          | 0.25       |
| <i>Staphylococcus aureus</i> NRS140       | +           | erythromycin,<br>spectinomycin                                                     | 1-2                      | 2          | 0.25       |
| <i>Staphylococcus aureus</i> NRS108       | +           | gentamycin,<br>oxacillin                                                           | 2                        | 2          | 0.5        |
| <i>Staphylococcus aureus</i> NRS146       | +           | vancomycin                                                                         | 2                        | 2          | 0.25       |
| <i>Staphylococcus aureus</i> ATCC 12600   | +           | rifampicin<br>( <i>rpoB</i> S486L)                                                 | 4                        | 4          | 0.5        |
| <i>Bacillus subtilis</i> ATCC 6051        | +           |                                                                                    | 2                        | 2          | 0.125      |
| <i>Bacillus subtilis</i> 168 IAI          | +           |                                                                                    | 4                        | 4          | 0.125      |
| <i>Enterococcus faecium</i> O1GRF         | +           |                                                                                    | 2-4                      | 2-4        | 0.125      |
| <i>Enterococcus faecium</i> EF16          | +           | vancomycin                                                                         | 2-4                      | 4          | 0.125      |
| <i>Enterococcus faecium</i> ATCC 51559    | +           | ampicillin<br>ciprofloxacin<br>gentamicin<br>rifampin<br>teicoplanin<br>vancomycin | 4-8                      | 8          | 0.125-0.25 |
| <i>Staphylococcus epidermidis</i> RP62A   | +           |                                                                                    | 2                        | 2          | 0.5-1      |
| <i>Streptococcus mutans</i> ATCC 25175    | +           |                                                                                    | 1                        | 1          | 0.5        |
| <i>Streptococcus oralis</i> ATCC 9811     | +           |                                                                                    | 2                        | 2          | 0.0625     |
| <i>Escherichia coli</i> DH5 $\alpha$      | –           |                                                                                    | > 64                     | > 64       | > 64       |
| <i>Escherichia coli</i> BAS 849           | –           |                                                                                    | 32-64                    | > 64       | > 64       |
| <i>Enterobacter cloacae</i> ATCC 13047    | –           |                                                                                    | > 64                     | > 64       | > 64       |
| <i>Pseudomonas aeruginosa</i> PAO1        | –           |                                                                                    | > 64                     | > 64       | > 64       |
| <i>Klebsiella pneumoniae</i> ATCC 10031   | –           |                                                                                    | > 64                     | > 64       | > 64       |
| <i>Acinetobacter baumannii</i> ATCC 17978 | –           |                                                                                    | > 64                     | > 64       | > 64       |
| <i>Salmonella enterica</i> A84            | –           |                                                                                    | > 64                     | > 64       | > 64       |
| <i>Proteus mirabilis</i> ATCC 29906       | –           |                                                                                    | > 64                     | > 64       | > 64       |
| <i>Candida albicans</i> ATCC 76485        | yeast       |                                                                                    | > 64                     | > 64       | > 64       |
| <i>Saccharomyces pombe</i> SAK931         | yeast       |                                                                                    | > 64                     | > 64       | > 64       |
| <i>Saccharomyces cerevisiae</i> W303 G1b  | yeast       |                                                                                    | > 64                     | > 64       | > 64       |

The antimicrobial data in the table were acquired in the presence of 100 mM of  $\text{CaCl}_2$ . All the values were determined on the basis of three independent experiments. 1  $\mu\text{g/mL}$  = 0.64  $\mu\text{M}$  for cadasides A and B.

**Table S6.** List of PCR primers used in this study

| Primer Name        | Sequence                                  | Function                                 |
|--------------------|-------------------------------------------|------------------------------------------|
| A3F <sup>6,7</sup> | GCSTACSYSATSTACACSTCSGG                   | eDNA library screening                   |
| A7R <sup>6,7</sup> | SASGTCVCCSGTSCGGTA                        | eDNA library screening                   |
| 431-Fw             | CGAAGGGTGTGGTGGTTGAG                      | Clone recovery of cosmid DFD0097-431     |
| 431-Rv             | TCATGAACGAGACACCCGAC                      | Clone recovery of cosmid DFD0097-431     |
| 157-Fw             | GTCCGAAGGGTGTGGTG                         | Clone recovery of cosmid DFD0097-157     |
| 157-Rv             | CACCTGATCCCTCGTCG                         | Clone recovery of cosmid DFD0097-157     |
| 262-Fw             | TCAGGAGGACCATGTCCGAG                      | Clone recovery of cosmid DFD0097-262     |
| 262-Rv             | CTCAGACCAGCGGTGTGTAG                      | Clone recovery of cosmid DFD0097-262     |
| cde-157-UPS_Fw     | GCCCCGTTAACCCCGCTTCGACCTGTCCGTCGAAC       | Upstream homology arm for TAR            |
| cde-157-UPS_Rv     | ATCTTGCCGTTGGTTTAAACGTACGTCAGGGAGCGGTCACC | Upstream homology arm for TAR            |
| cde-262-DWS_Fw2    | GTTTAAACCAACGGCAAGATCTACCGCGG             | Downstream homology arm for TAR          |
| cde-262-DWS_Rv2    | CCCTGCAGGAGCTCGCGTTGTCGAACGAGGTGTAGG      | Downstream homology arm for TAR          |
| TAR_check1_Fw      | CTCATCGACACGTGGCTCAAG                     | Check TAR fidelity by primer-walking PCR |
| TAR_check1_Rv      | TCCAGGGAGAAGACGATCTGC                     | Check TAR fidelity by primer-walking PCR |
| TAR_check2_Fw      | GCACACTTCTACATCCGCGAG                     | Check TAR fidelity by primer-walking PCR |
| TAR_check2_Rv      | GAGATCGTAGGTGTACGAGCC                     | Check TAR fidelity by primer-walking PCR |
| TAR_check3_Fw      | GTCCGAAGGGTGTGGTG                         | Check TAR fidelity by primer-walking PCR |
| TAR_check3_Rv      | CACCTGATCCCTCGTCG                         | Check TAR fidelity by primer-walking PCR |
| TAR_check4_Fw      | GACTGCTCCGCTACCTCAAC                      | Check TAR fidelity by primer-walking PCR |
| TAR_check4_Rv      | CAGGTGTGAGAGGTCCGGCTT                     | Check TAR fidelity by primer-walking PCR |
| TAR_check5_Fw      | GATGACCAGGTGAAGGTGC                       | Check TAR fidelity by primer-walking PCR |
| TAR_check5_Rv      | GTGATGTTCTCCGTGCTCG                       | Check TAR fidelity by primer-walking PCR |
| TAR_check6_Fw      | GATACCGTGGACAACCACGC                      | Check TAR fidelity by primer-walking PCR |
| TAR_check6_Rv      | GCGAGATCACCGGTATCTC                       | Check TAR fidelity by primer-walking PCR |

**Figure S1.** Phylogenetic tree of AD NPSTs identified by eSNaPD analysis. The tree contains 33 metagenomic library Asp4 related NPSTs (e-value <math>10^{-40}</math>) and trimmed Asp4 AD domain sequences from reference calcium-dependent antibiotic gene clusters. 18 cosmid clones associated with Asp4 NPSTs were recovered from the eDNA libraries and PGM sequenced. The amino acid specificity of each AD domain found on these clones was bioinformatically predicted and annotated on the tree in blue color. The cosmid DFD0097-431 encoding cadaside is highlighted in yellow.

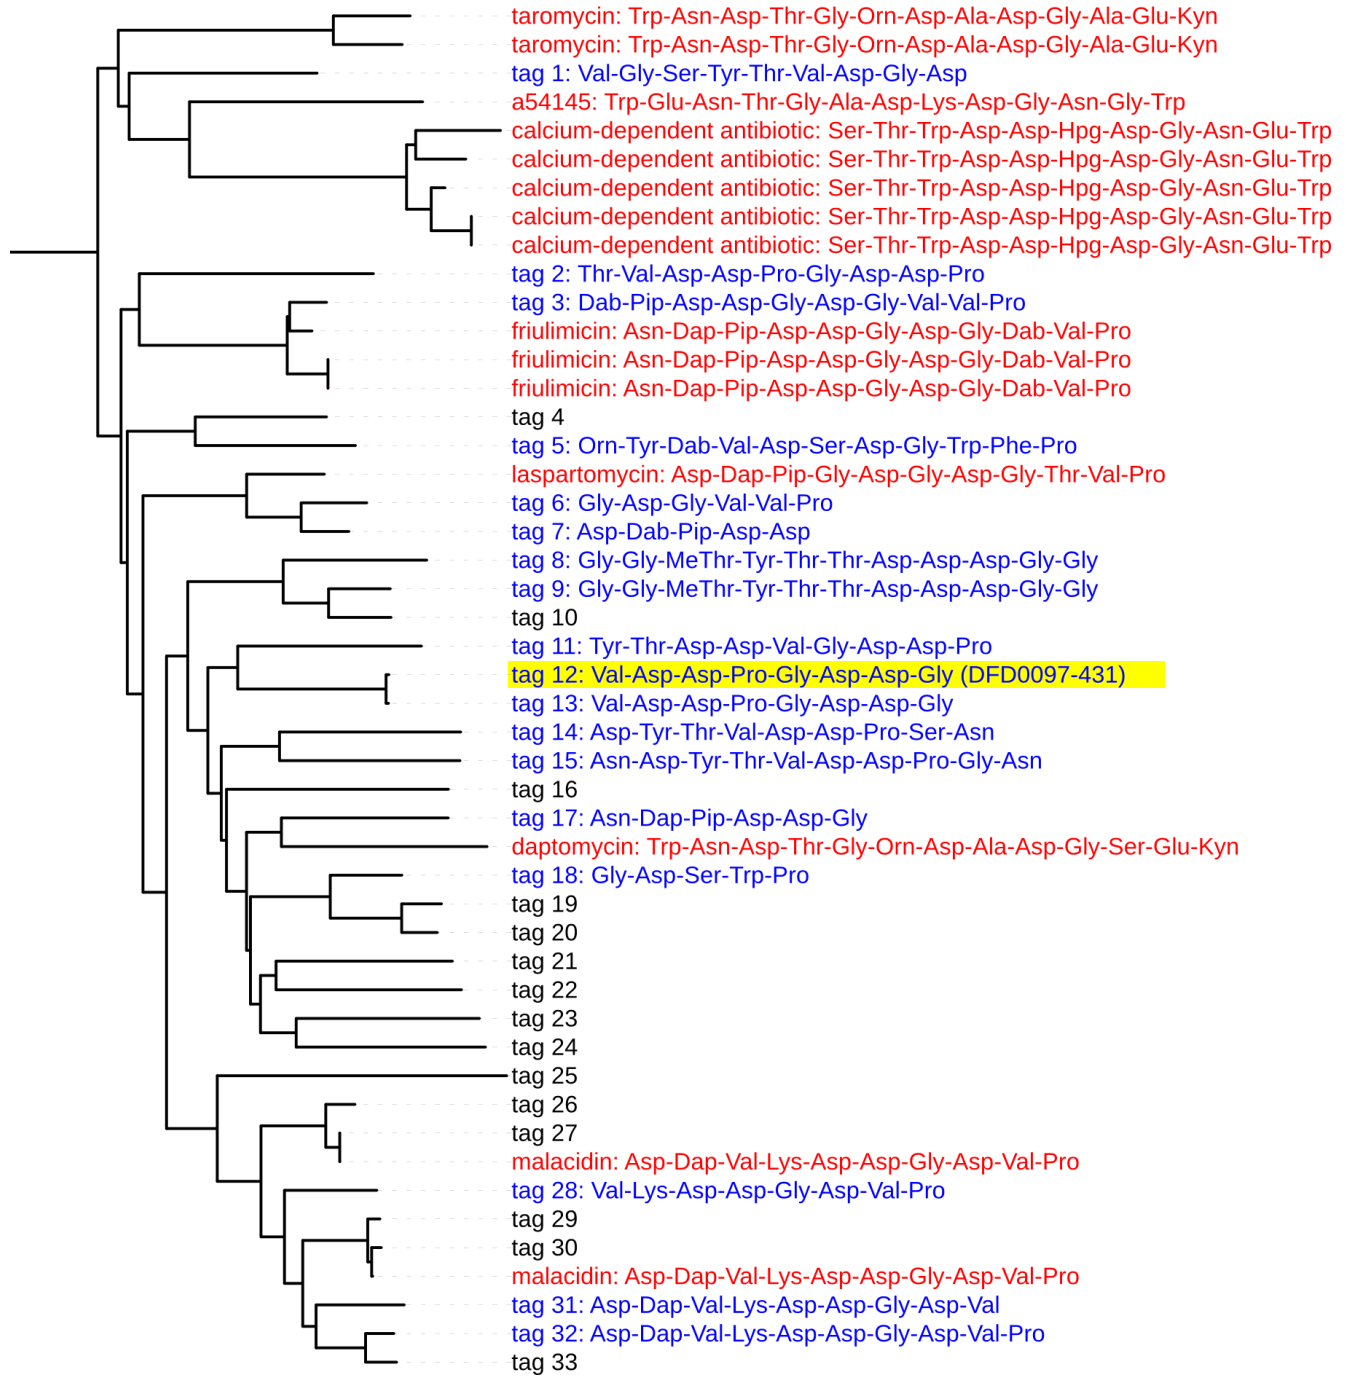

**Figure S2.** Comparison of the biosynthetic gene clusters for cadasides and other calcium-dependent antibiotics. NRPS genes are indicated in light blue with domain architecture and incorporated amino acids listed below each gene. The rest of the genes are colored by predicted functions: regulator (green), transporter (yellow), amino acid biosynthesis (purple), and fatty acid biosynthesis (red). Table of relationships between *cde* genes and their closest relatives found in other calcium-dependent antibiotic gene clusters. Percent identity is shown in parenthesis. The genes exclusive to *cde* gene cluster are those predicted to be responsible for the biosynthesis of nonproteinogenic amino acids AMPA and D-Ile.

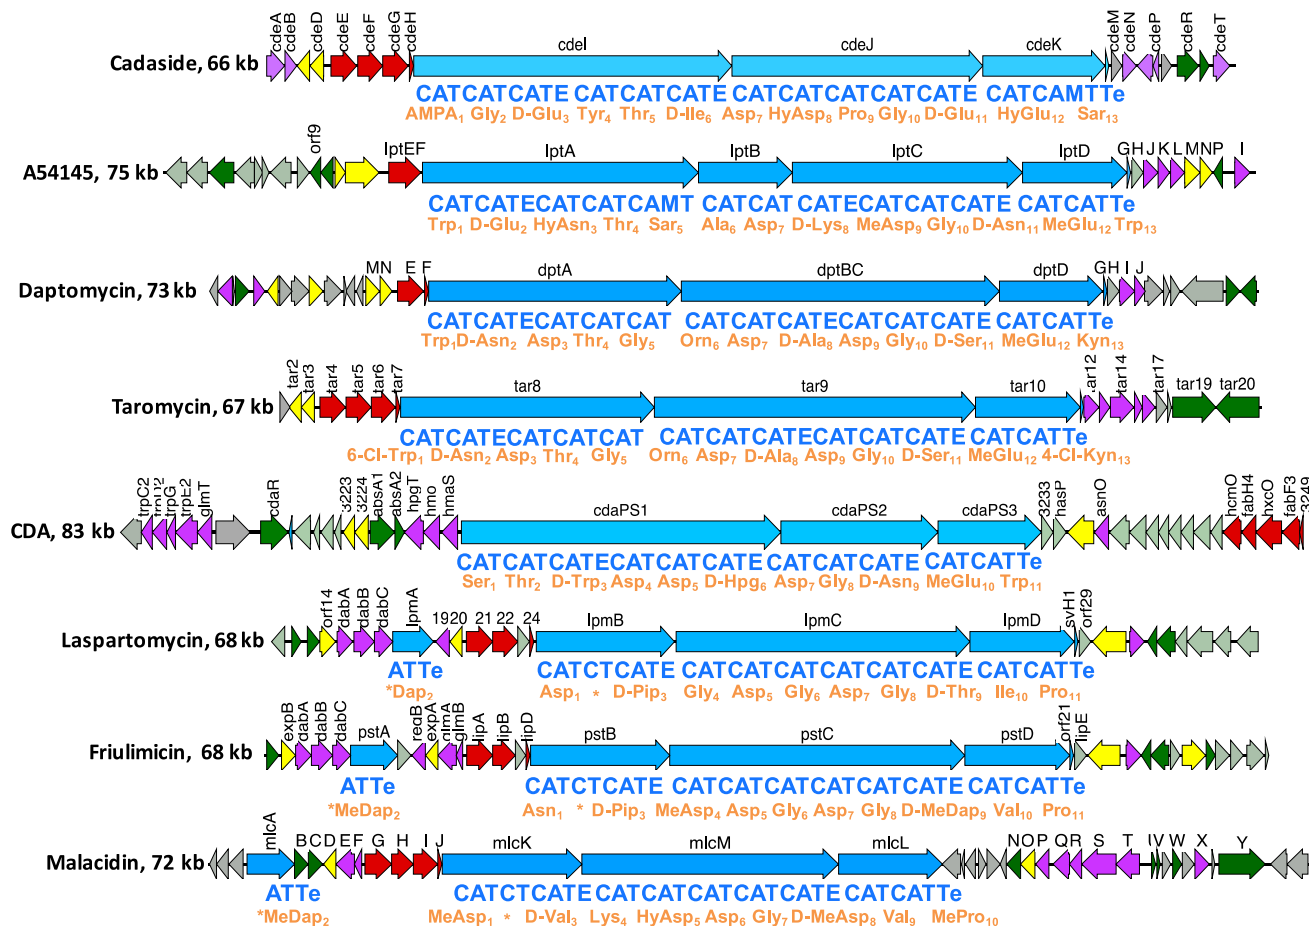

| Cadaside | Malacidin (eDNA) | Laspartomycin ( <i>Streptomyces viridochromogenes</i> ) | Friulimicin ( <i>Actinoplanes friuliensis</i> ) | A54145 ( <i>Streptomyces fradiae</i> ) | CDA ( <i>Streptomyces coelicolor</i> ) | Daptomycin ( <i>Streptomyces roseosporus</i> ) | Taromycin ( <i>Saccharomonospora sp. CNQ490</i> ) |
|----------|------------------|---------------------------------------------------------|-------------------------------------------------|----------------------------------------|----------------------------------------|------------------------------------------------|---------------------------------------------------|
| CdeA     | –                | –                                                       | –                                               | –                                      | –                                      | –                                              | –                                                 |
| CdeB     | –                | Orf29 (67%)                                             | LipE (63%)                                      | LptH (57%)                             | SCO3233 (62%)                          | DapH (60%)                                     | Tar17 (32%)                                       |
| CdeC     | MlcD (52%)       | Orf20 (46%)                                             | ExpA (53%)                                      | LptN (49%)                             | SCO3223 (35%)                          | DapN (52%)                                     | Tar2 (47%)                                        |
| CdeD     | MlcO (62%)       | Orf14 (60%)                                             | ExpB (61%)                                      | LptM (57%)                             | SCO3224 (33%)                          | DapM (62%)                                     | Tar3 (62%)                                        |
| CdeE     | MlcG (54%)       | Orf21 (50%)                                             | LipA (52%)                                      | LptEF (45%)                            | –                                      | DapE (48%)                                     | Tar4 (45%)                                        |
| CdeF     | MlcH (58%)       | Orf22 (50%)                                             | LipB (50%)                                      | –                                      | –                                      | –                                              | Tar5 (51%)                                        |
| CdeG     | MlcI (55%)       | –                                                       | –                                               | –                                      | –                                      | –                                              | Tar6 (50%)                                        |
| CdeH     | MlcJ (47%)       | Orf24 (64%)                                             | LipD (58%)                                      | –                                      | –                                      | DapF (42%)                                     | Tar6 (36%)                                        |
| CdeI     | MlcM (44%)       | LpmC (50%)                                              | PstC (51%)                                      | LptC (47%)                             | CdaPS1 (47%)                           | DapBC (45%)                                    | Tar9 (45%)                                        |
| CdeJ     | MlcL (56%)       | LpmC (54%)                                              | PstC (53%)                                      | LptC (48%)                             | CdaPS1 (49%)                           | DapBC (48%)                                    | Tar8 (50%)                                        |
| CdeK     | MlcM (48%)       | LpmD (51%)                                              | PstD (50%)                                      | LptD (52%)                             | CdaPS3 (52%)                           | DapD (52%)                                     | Tar10 (51%)                                       |
| CdeL     | MlcV (76%)       | SvH1 (72%)                                              | Orf21 (75%)                                     | LptG (65%)                             | CdaPS2 (72%)                           | DapG (66%)                                     | Tar11 (72%)                                       |
| CdeM     | –                | –                                                       | –                                               | –                                      | –                                      | –                                              | –                                                 |
| CdeN     | MlcC (69%)       | Orf19 (32%)                                             | RegB (34%)                                      | LptJ (60%)                             | AsnO (35%)                             | –                                              | –                                                 |
| CdeO     | –                | –                                                       | –                                               | –                                      | –                                      | –                                              | –                                                 |
| CdeP     | –                | –                                                       | –                                               | –                                      | –                                      | –                                              | –                                                 |
| CdeQ     | –                | –                                                       | –                                               | –                                      | –                                      | –                                              | –                                                 |
| CdeR     | –                | –                                                       | –                                               | –                                      | AbsA1 (45%)                            | –                                              | –                                                 |
| CdeS     | –                | –                                                       | –                                               | Orf9 (48%)                             | AbsA2 (60%)                            | –                                              | –                                                 |
| CdeT     | –                | –                                                       | –                                               | –                                      | –                                      | –                                              | –                                                 |



**Figure S3.** High-resolution mass spectra of cadasides A (1) and B (2)

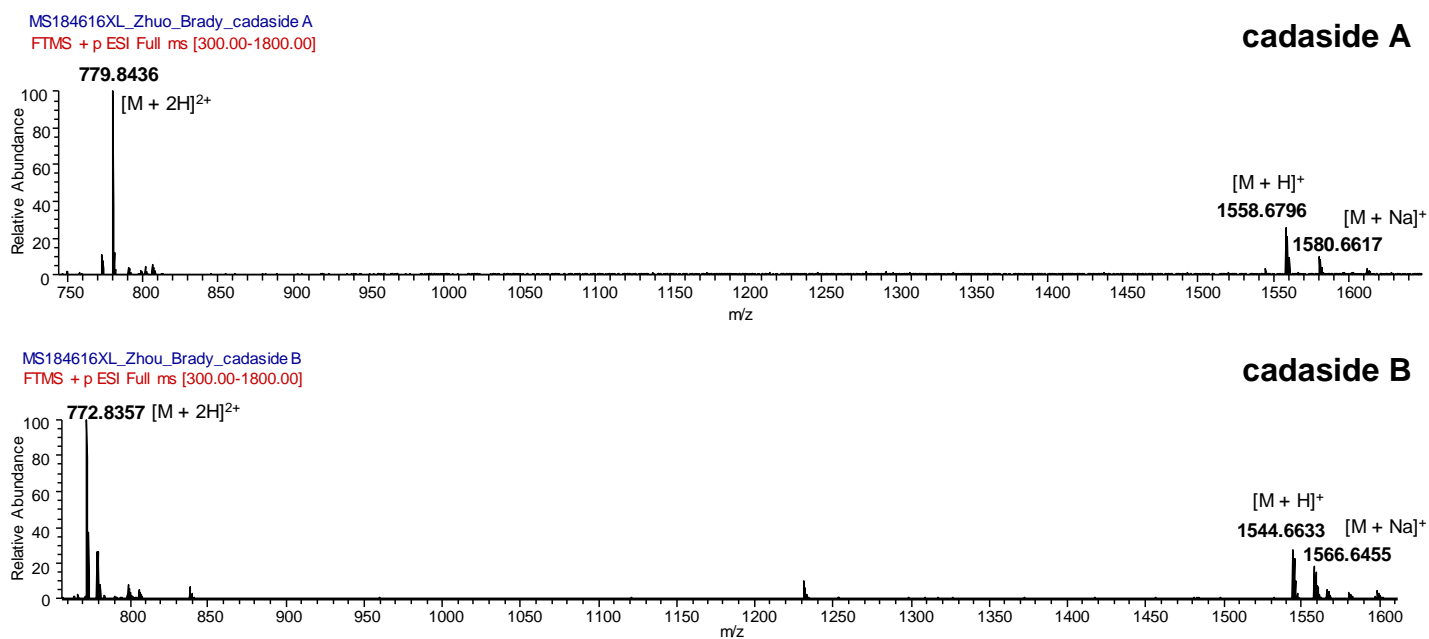

**Figure S4.** Structure characterization of cadaside A using 2D NMR correlations. **A)** The structure of each amino acid residue and the fatty acid side chain were assigned using COSY, TOCSY and HMBC correlations. **B)** The key 2D NMR correlations observed between  $\alpha$  protons of amino acid residues and carbonyl carbons are shown. Based on this data, five partial structures were determined.

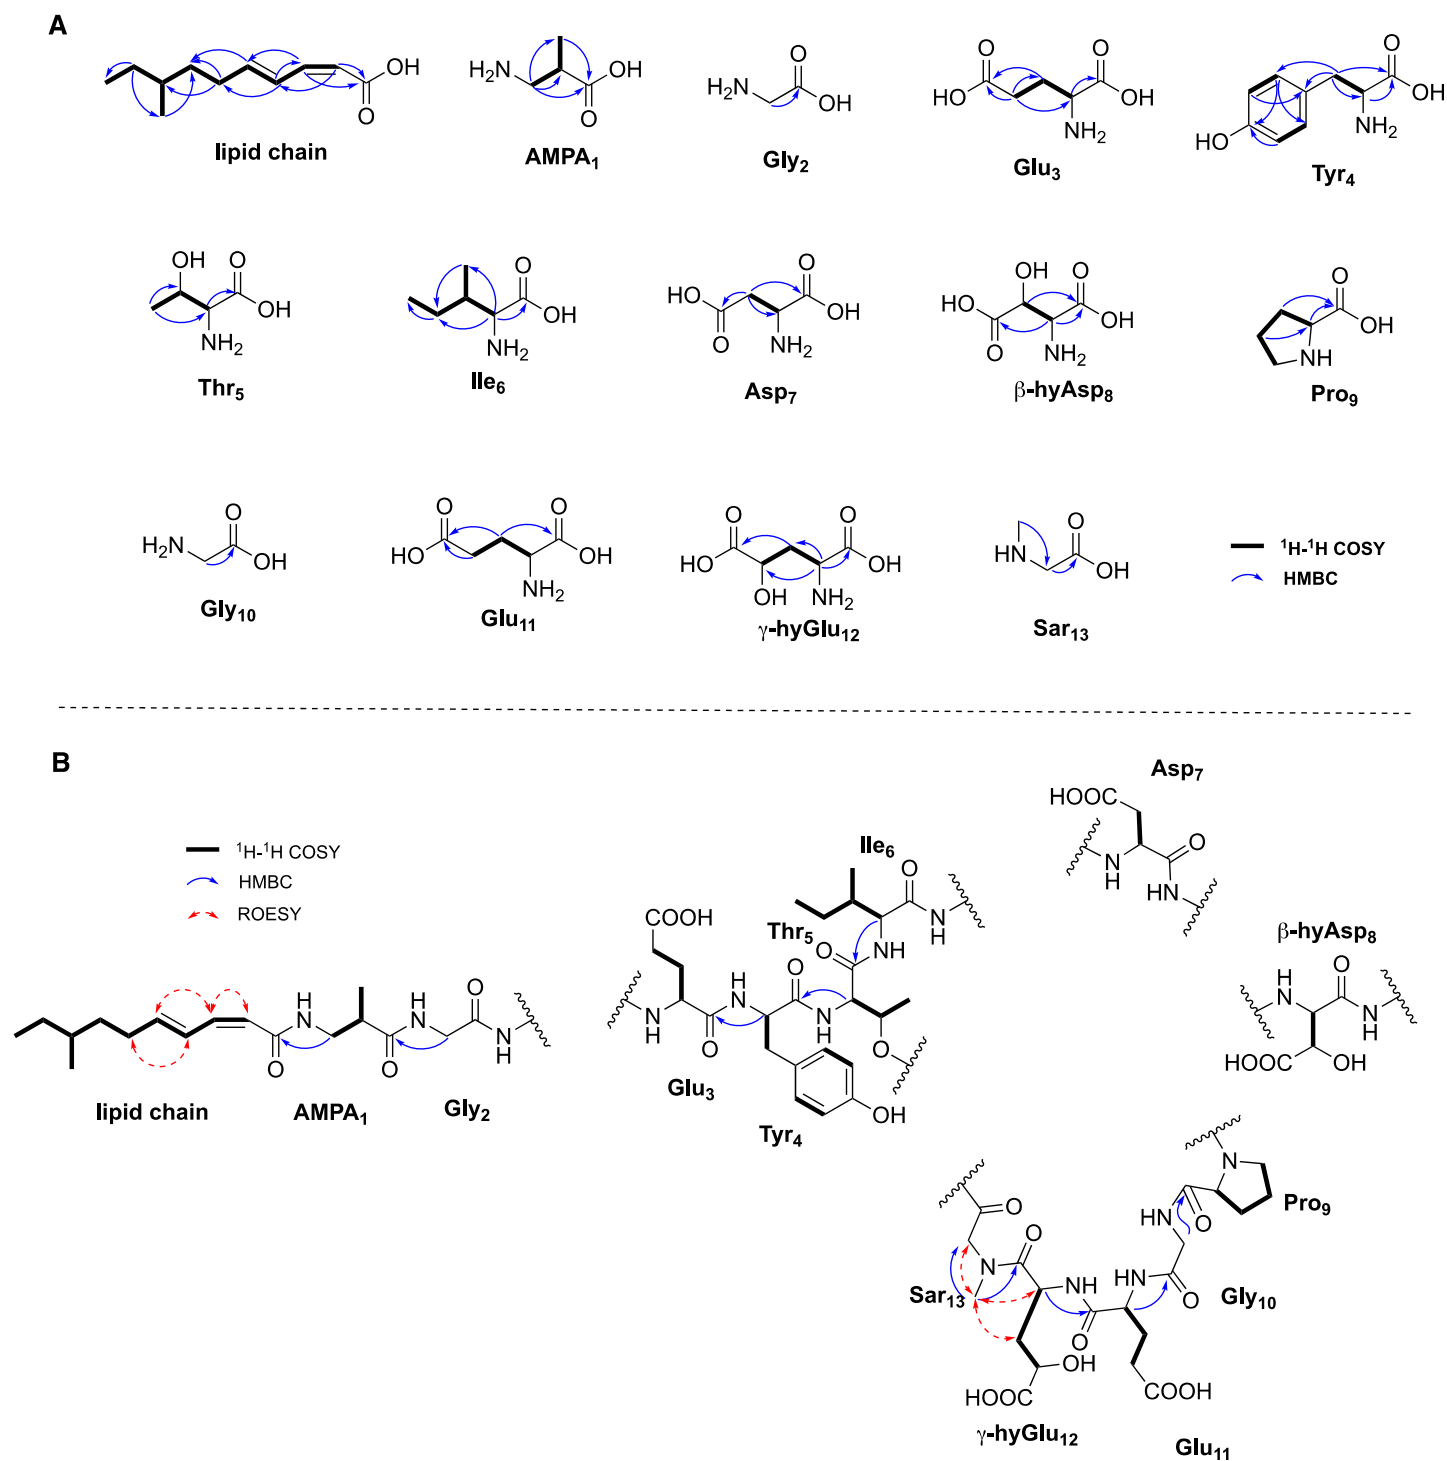

**Figure S5.** ESI-CID-MS/MS fragmentation of cadasides A (1) and B (2)

MS184616XL\_Zhuo\_Brady\_cadaside A  
Average spectrum MS2 779.84 (616-1435)

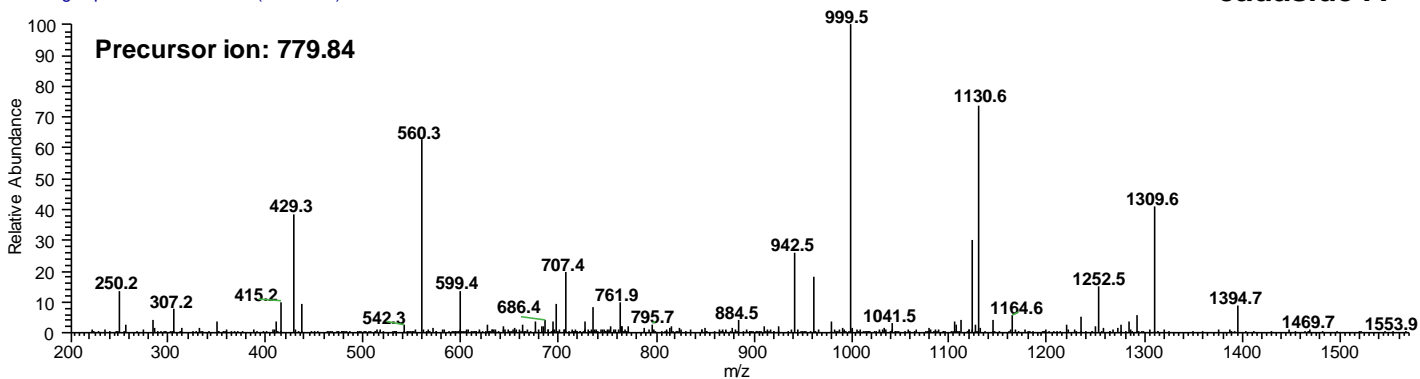

MS184616XL\_Zhuo\_Brady\_cadaside B  
Average spectrum MS2 772.83 (673-1202)

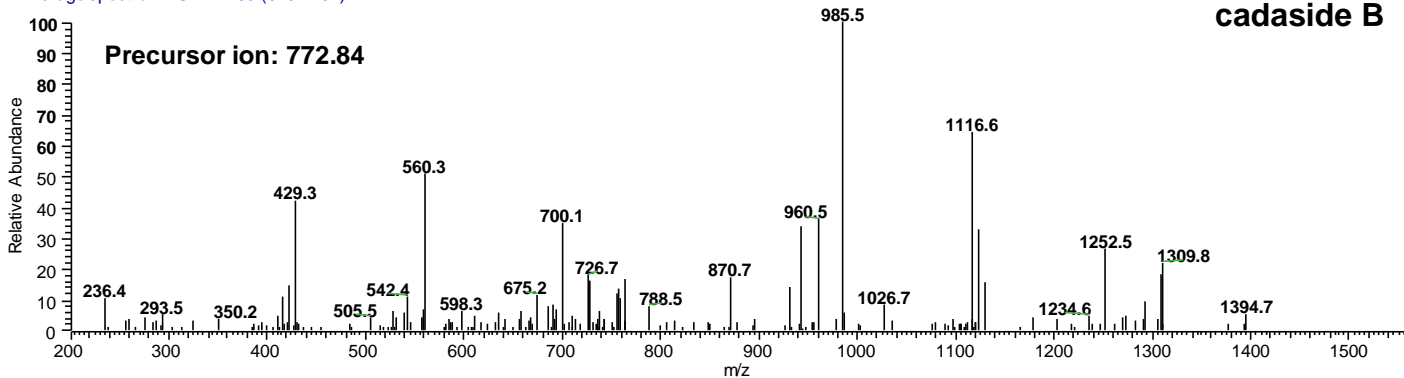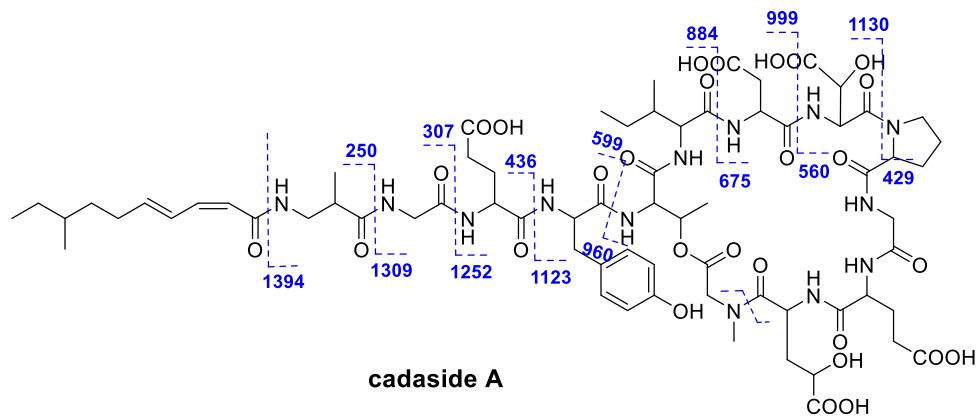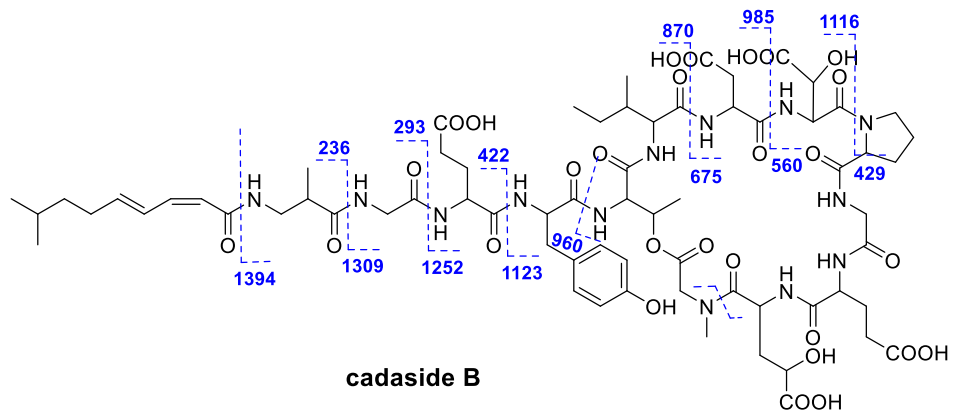

**Figure S6.** Annotated ESI-CID-MS/MS fragments of cadaside A (**1**)

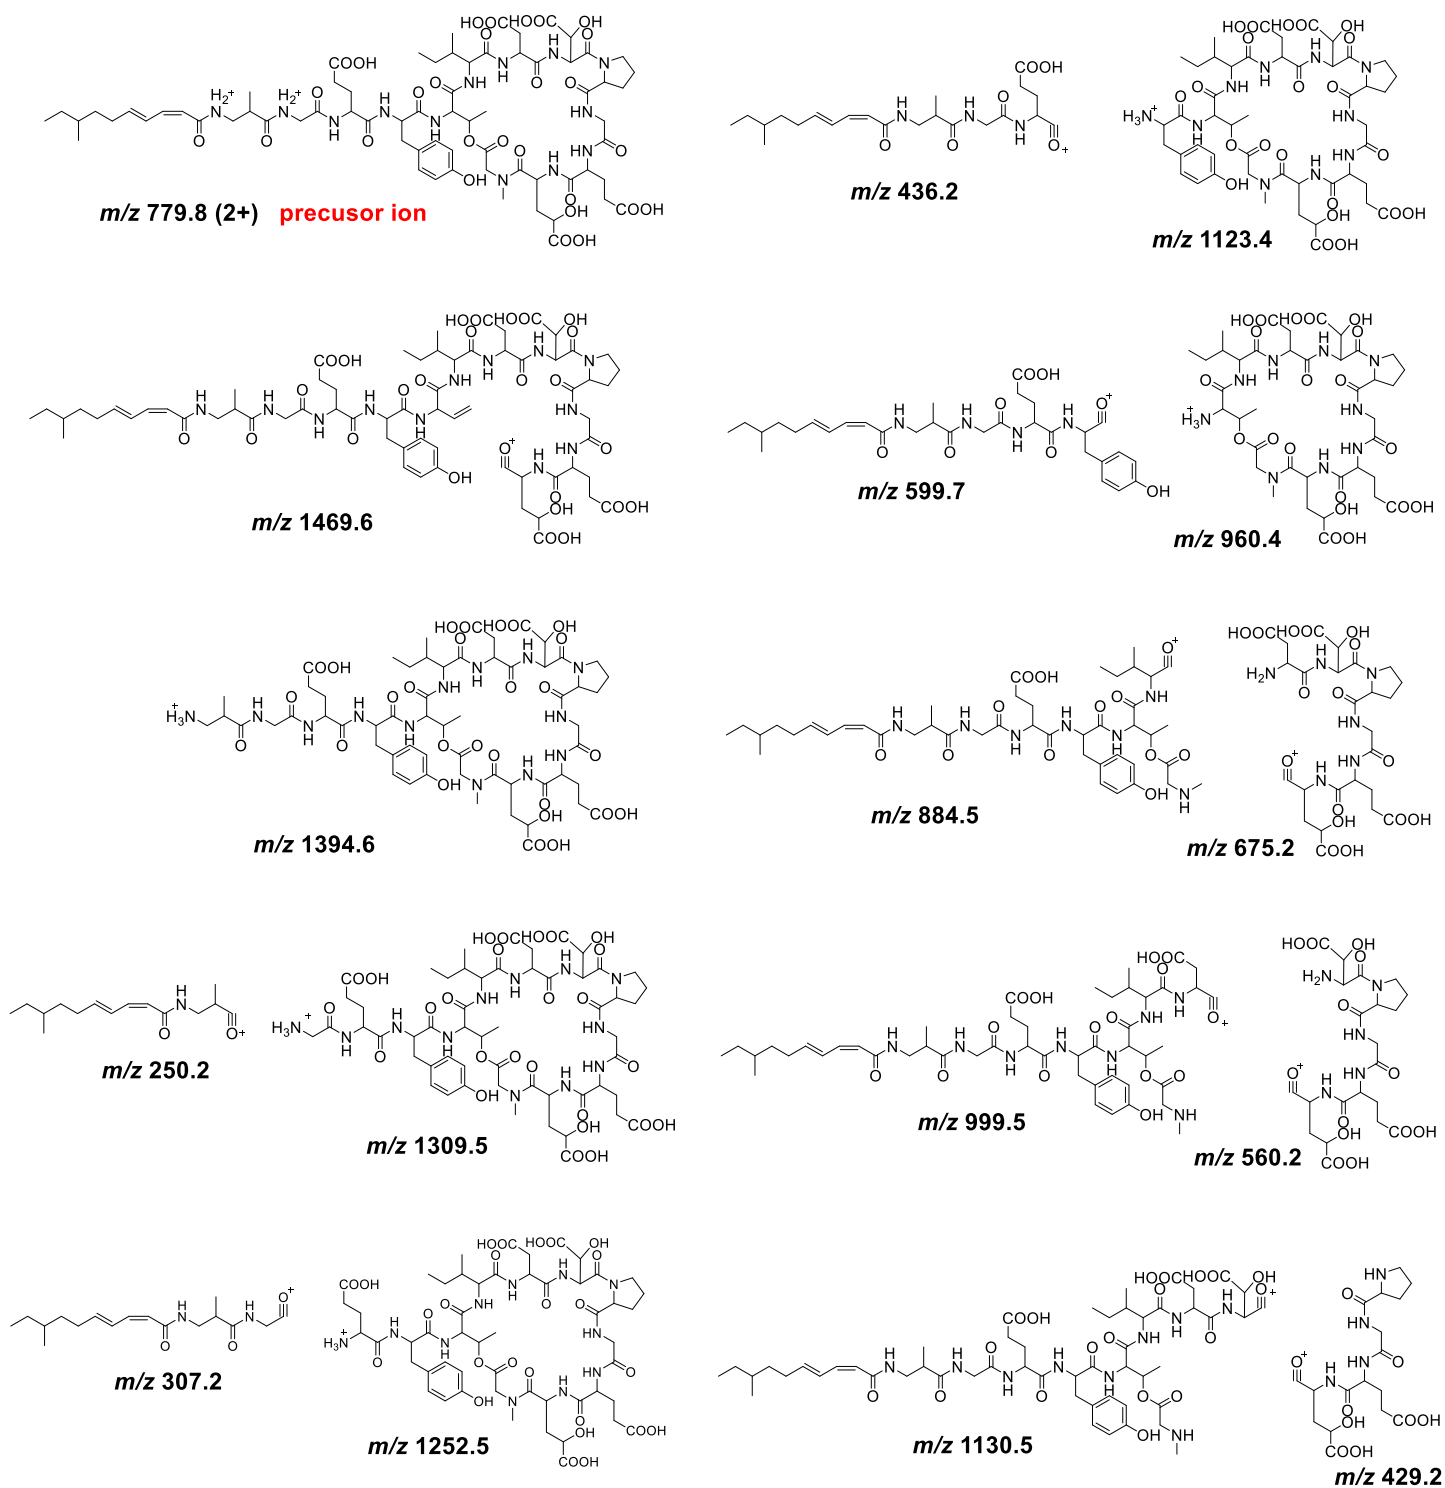

**Figure S7.** Key 2D NMR correlations for cadaside B (**2**)

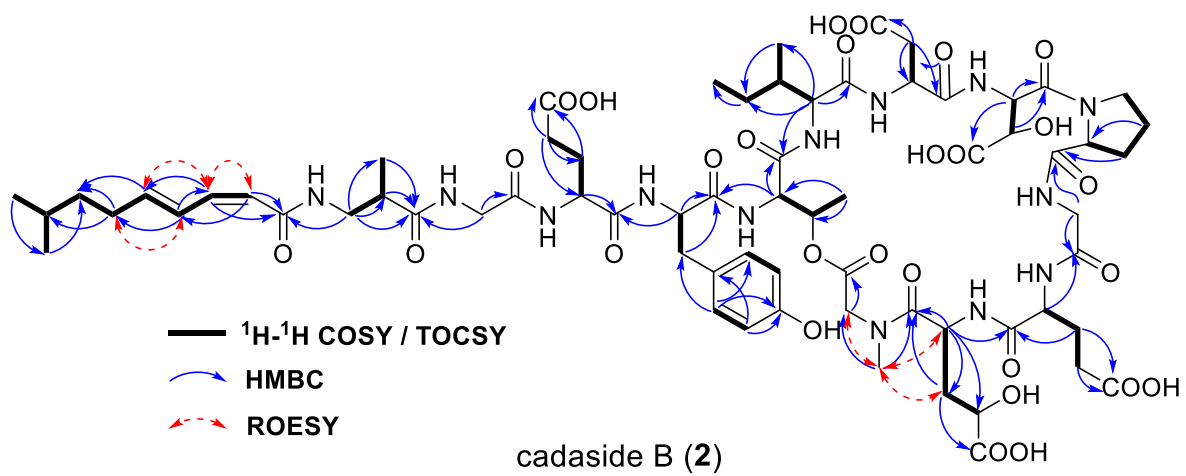

**Figure S8.** Extracted ion chromatogram of L- and D-FDAA derivatives of the hydrolysate of cadaside A (1)

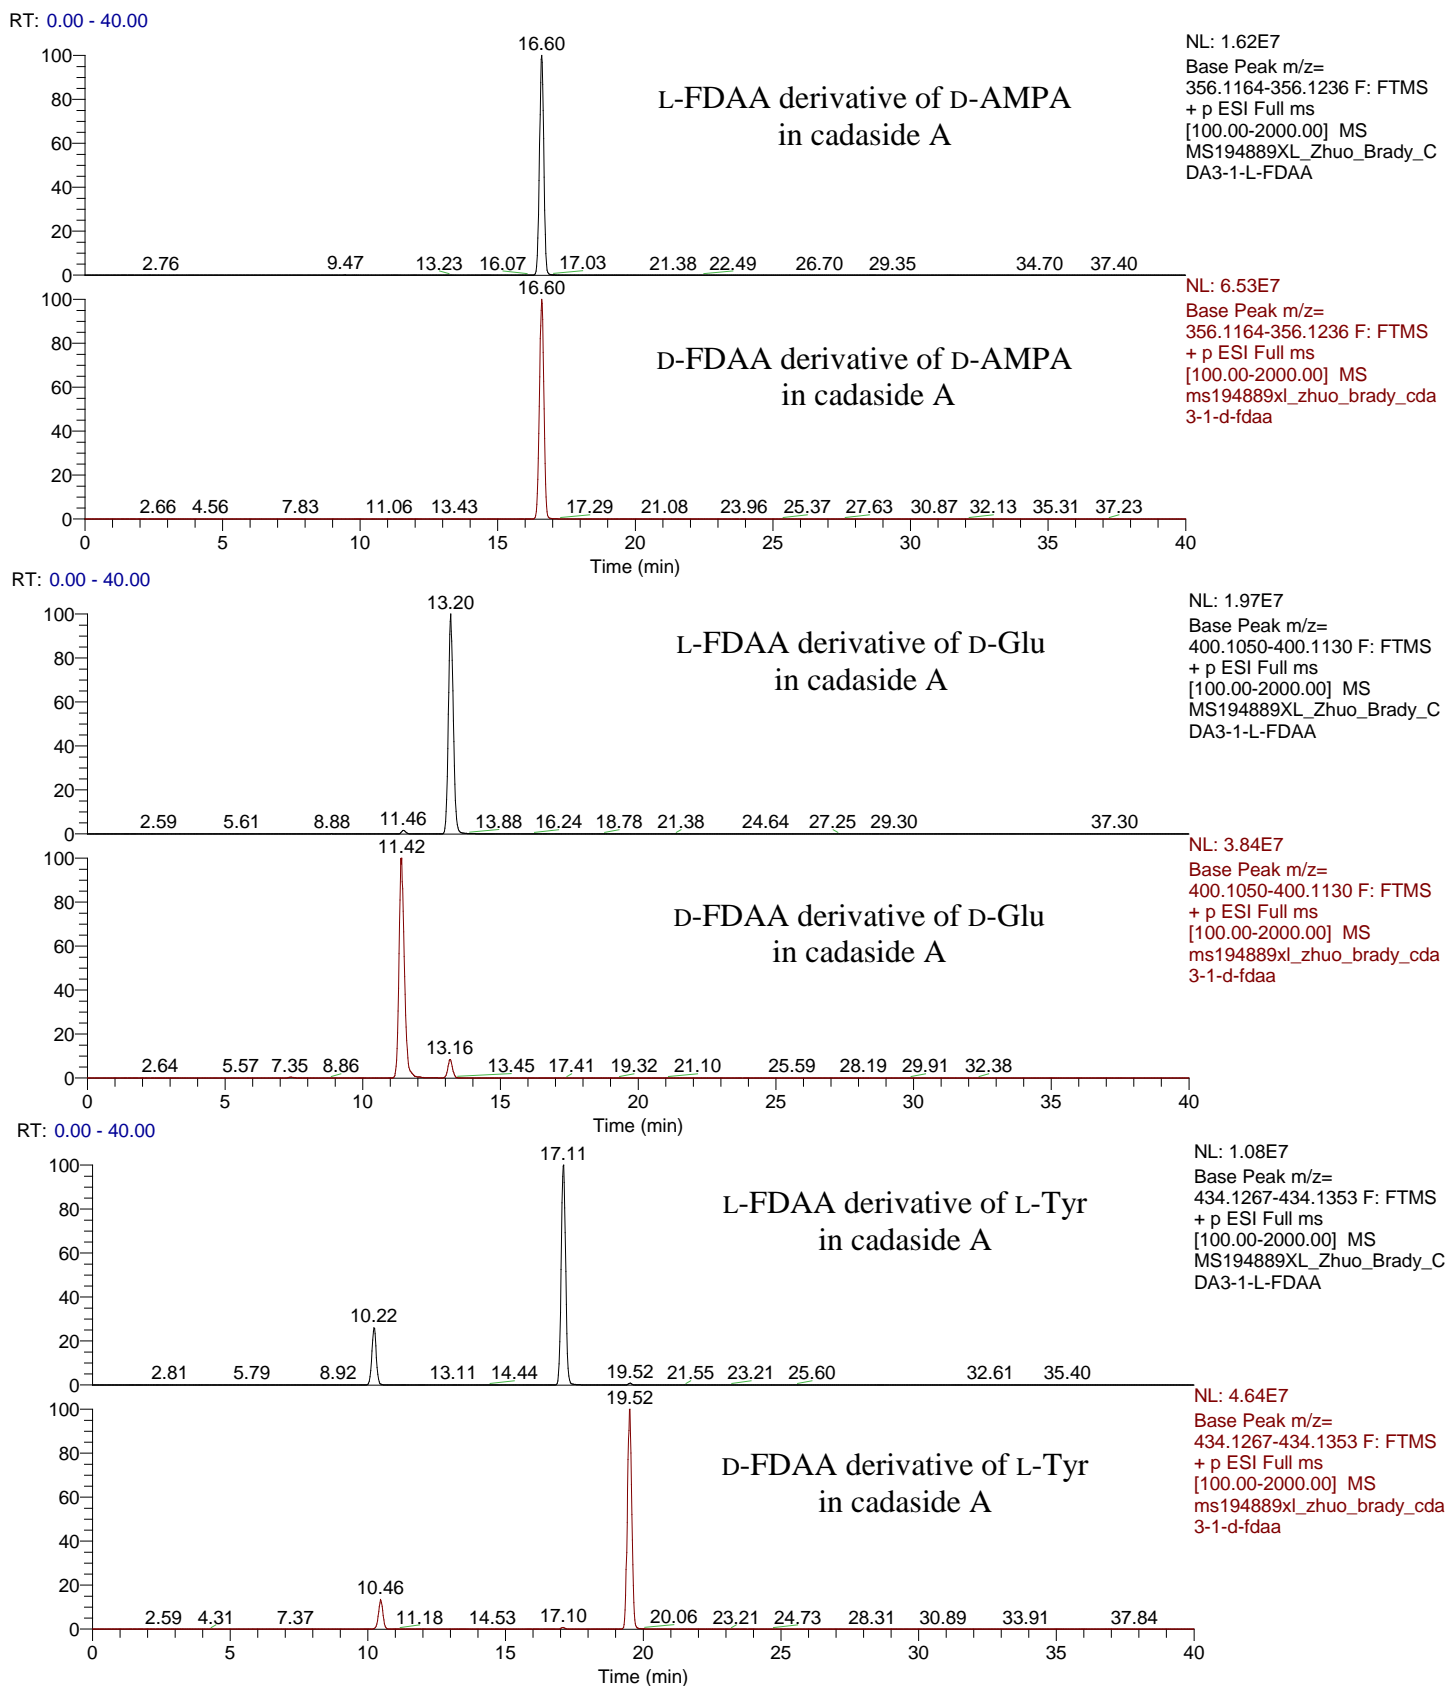

**Figure S8 (continued).** Extracted ion chromatogram of L- and D-FDAA derivatives of the hydrolysate of cadaside A (1)

RT: 0.00 - 40.00

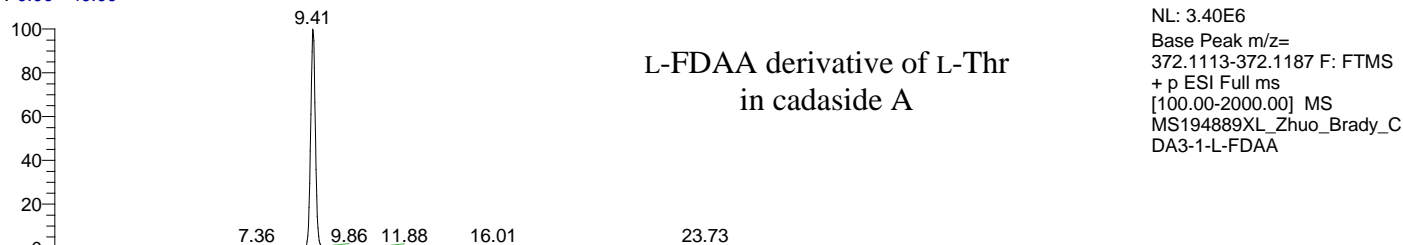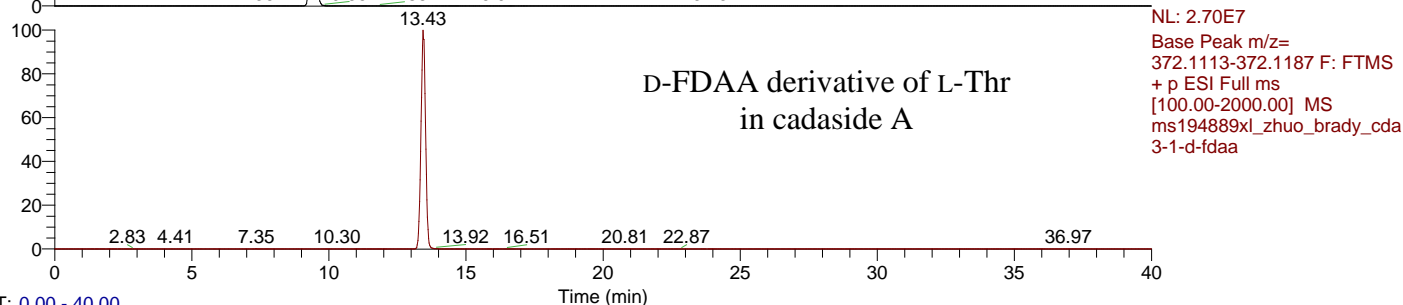

RT: 0.00 - 40.00

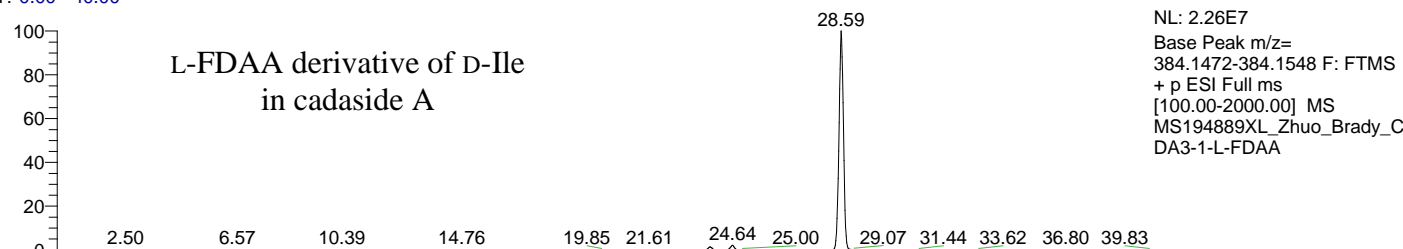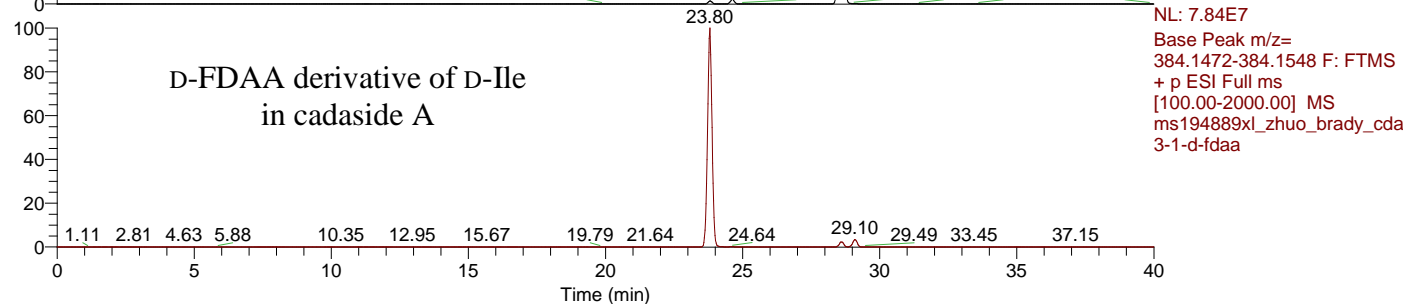

RT: 0.00 - 40.00

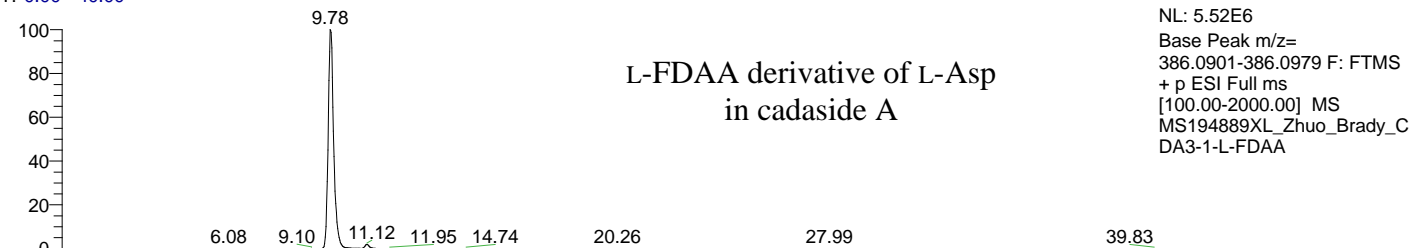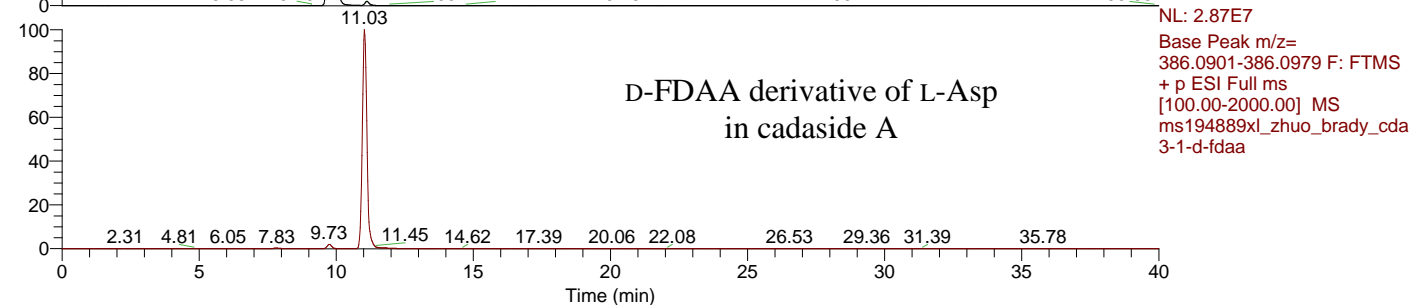

**Figure S8 (continued).** Extracted ion chromatogram of L- and D-FDAA derivatives of the hydrolysate of cadaside A (1)

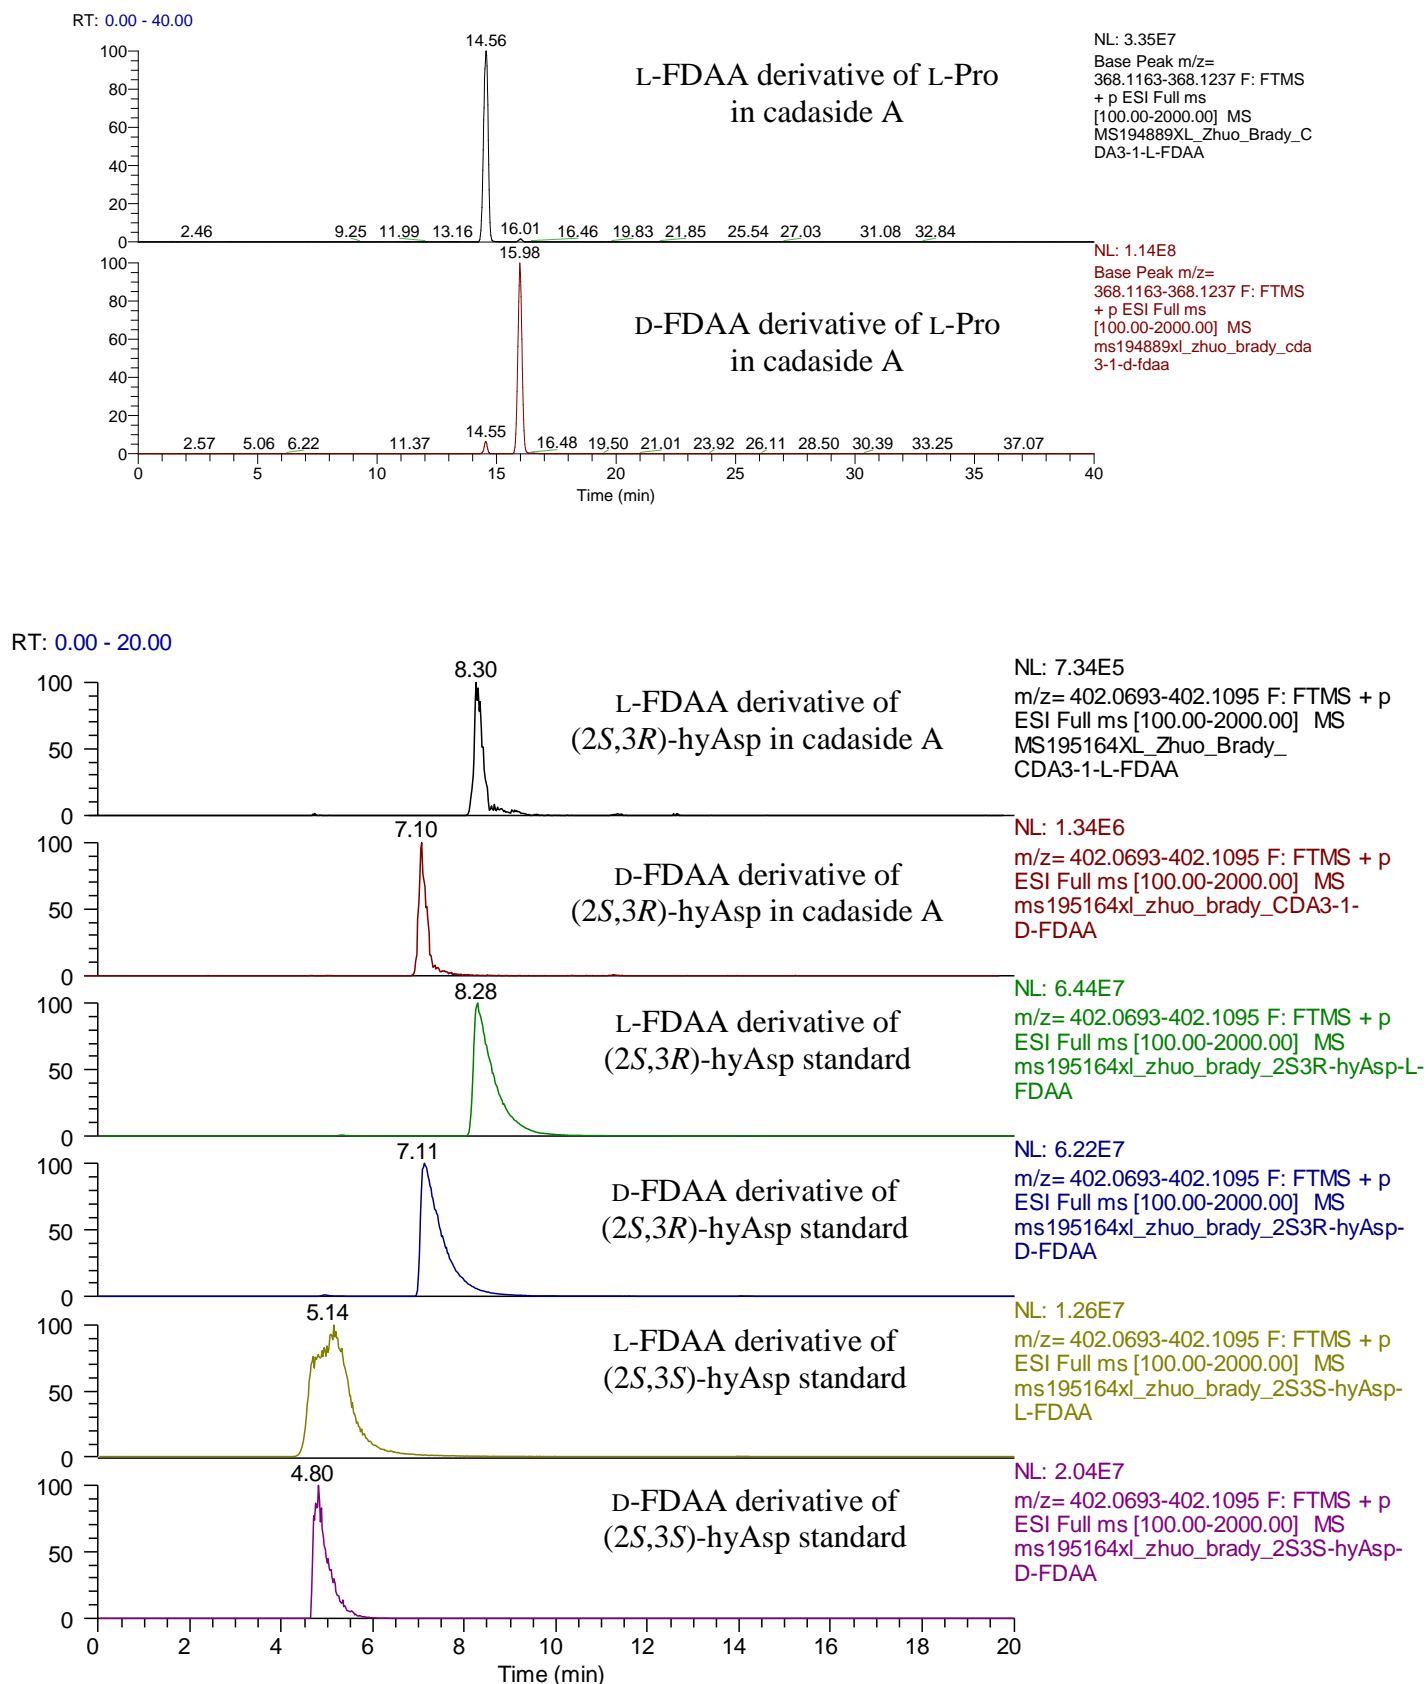



**Figure S8 (continued).** Extracted ion chromatogram of L- and D-FDAA derivatives of the hydrolysate of cadaside A (1)

RT: 0.00 - 20.00

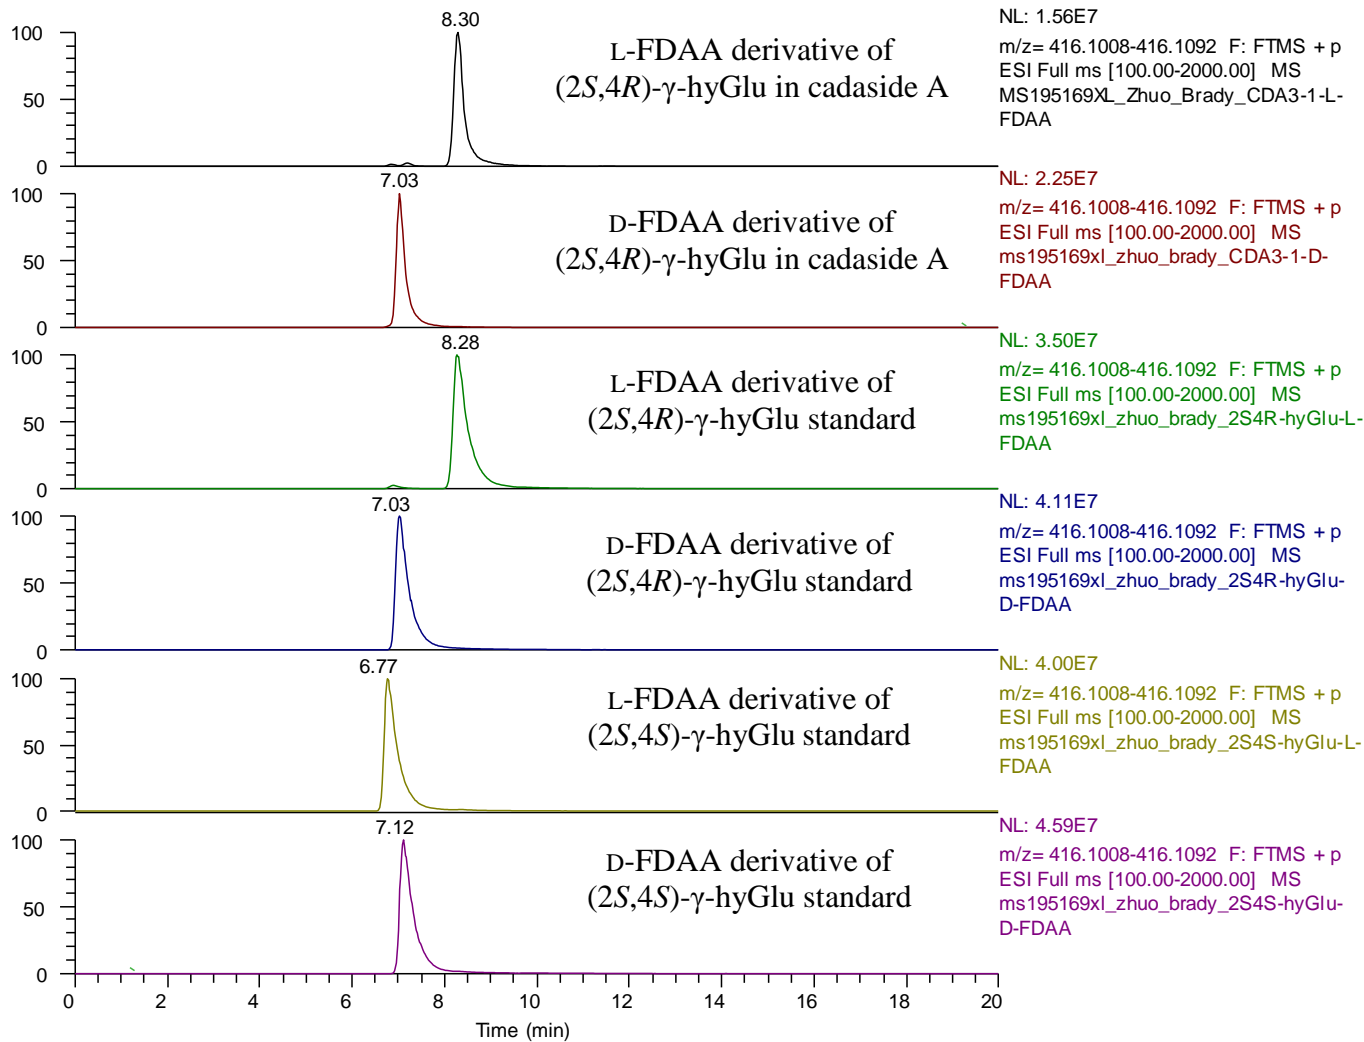

**Figure S9.** HPLC-DAD analysis of GITC derivatives of cadaside A hydrolysate and L/D-AMPA standards indicated that the presence of D-AMPA in cadaside A.

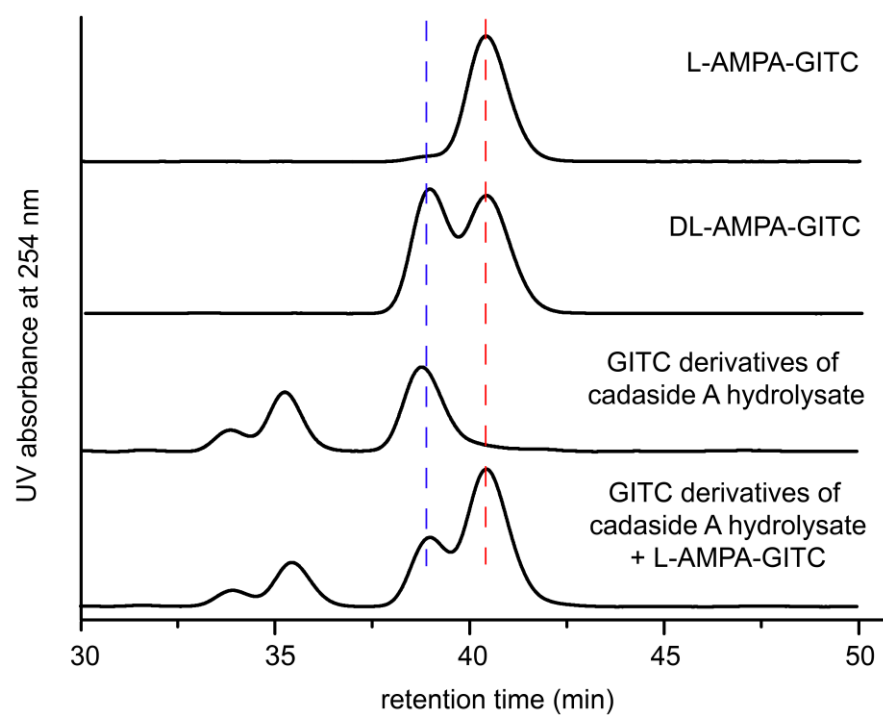

**Figure S10.** Proposed biosynthetic pathway for cadaside A. Cadaside A biosynthesis is predicted to follow an orthodox colinear extension model of modular NRPS system. The putative functions of key biosynthetic enzymes encoded by the *cde* gene cluster are highlighted. ACP, acyl carrier protein; C, condensation domain; A, adenylation domain; TE, thioesterase domain; T, thiolation domain; E, epimerization domain; nMT, *N*-methyltransferase domain. The proposed biosynthetic pathways of the nonproteinogenic amino acids  $\beta$ -hyAsp,  $\gamma$ -hyGlu,<sup>8,9</sup> D-Ile,<sup>10</sup> and AMPA,<sup>11–13</sup> are shown in the box.

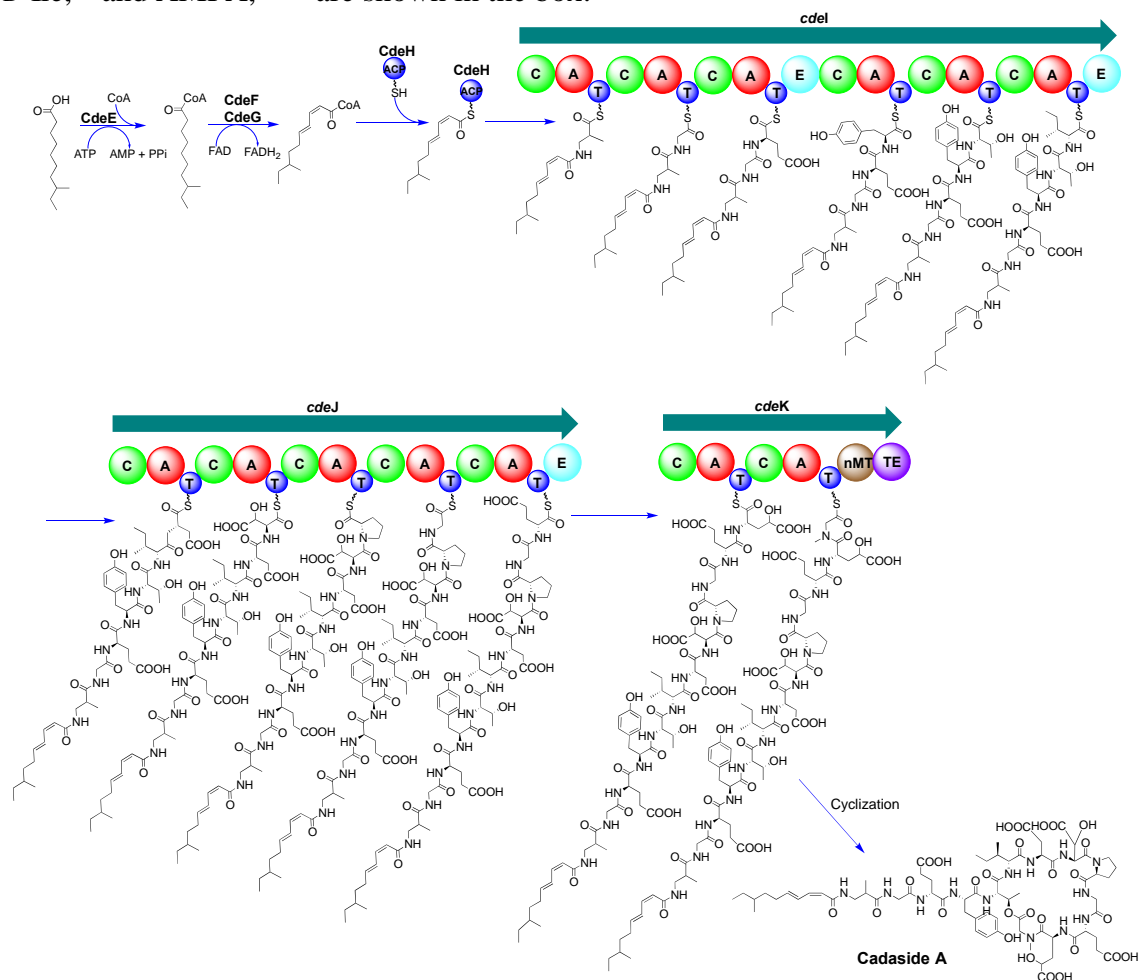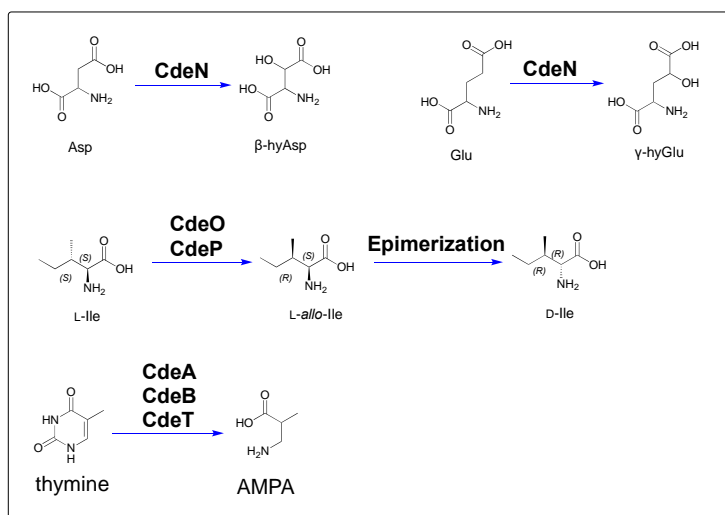

**Figure S11.  $^{13}\text{C}$  labelling confirms that the AMPA residue in cadaside A originates from thymine.** (A) HRMS comparison of cadaside A (**1**) produced by  $^{13}\text{CH}_3$ -thymine fed cultures with that produced by control cultures supplemented with unlabeled thymine. When normalized to the  $^{12}\text{C}$  peak ( $m/z$  779.8422), the peak containing a single  $^{13}\text{C}$  atom ( $m/z$  780.3437) is enriched by  $\sim 30\%$  in the  $^{13}\text{CH}_3$ -thymine fed cultures. The red asterisk marks peak containing a single  $^{13}\text{C}$  atom; (B) CID-FT MS/MS analysis of the parental ion at  $m/z$  780.34 from both  $^{13}\text{C}$  fed and unlabeled cultures. The red and blue peaks for each fragment ion correspond to molecules containing a single  $^{13}\text{C}$  atom and those containing only  $^{12}\text{C}$ , respectively. The ratio of the  $^{13}\text{C}$  containing peak to the uniform  $^{12}\text{C}$  peak ( $^{13}\text{C}/^{12}\text{C}$ ) for each fragment ion revealed that enrichment of the  $^{13}\text{C}$  labeled peak for only those fragments (left column) containing an AMPA residue.

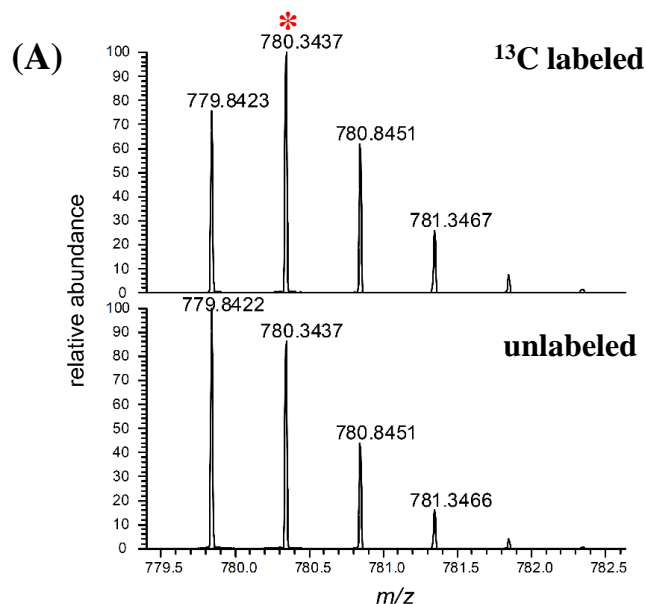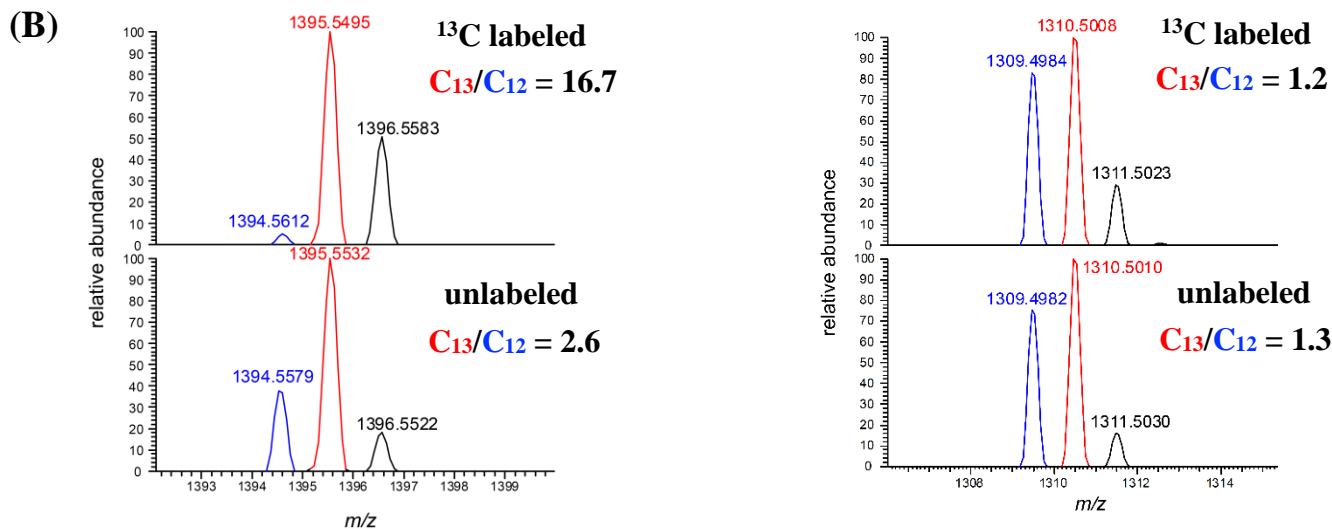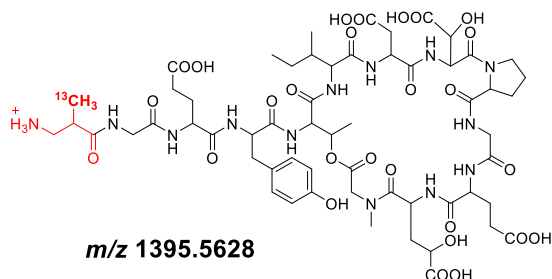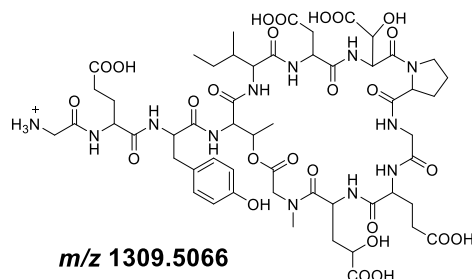

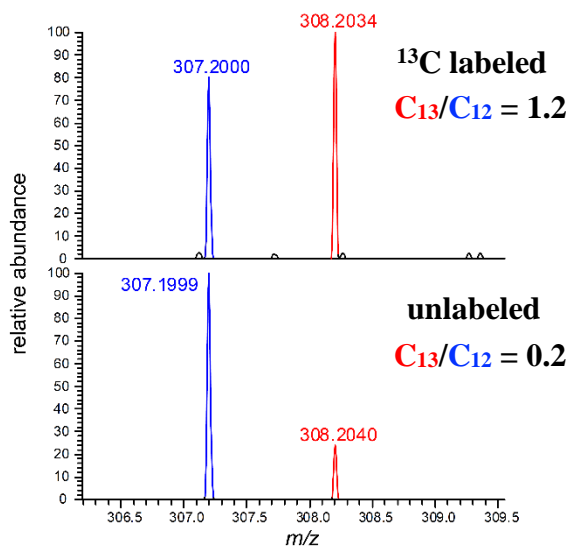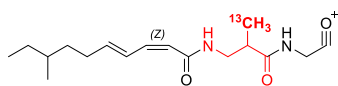

**m/z 308.2050**

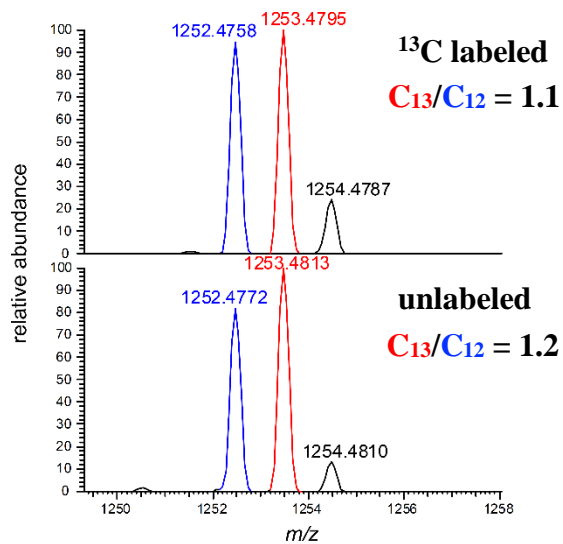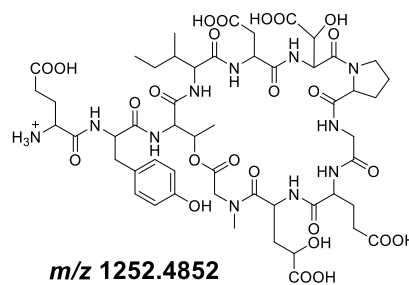

**m/z 1252.4852**

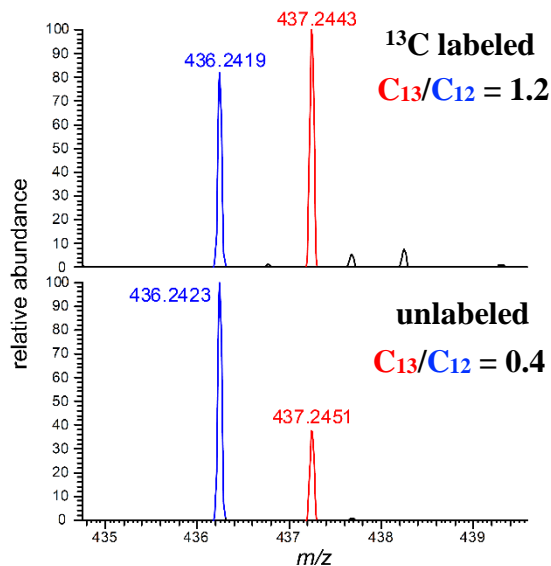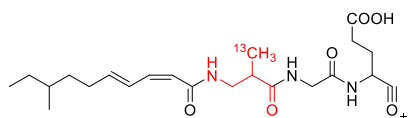

**m/z 437.2476**

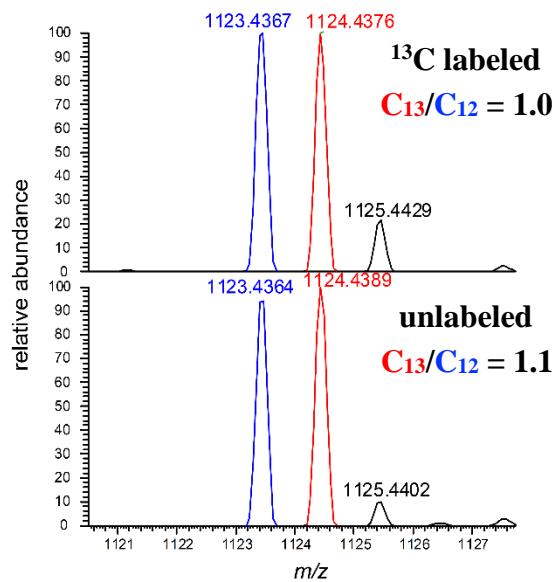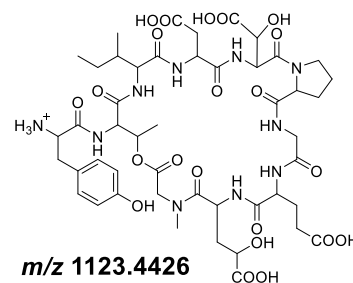

**m/z 1123.4426**

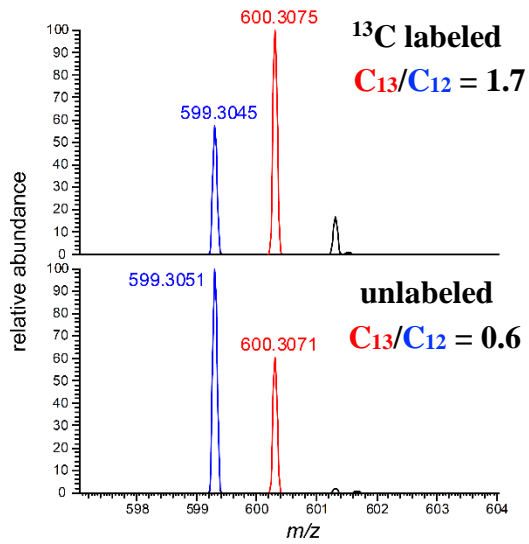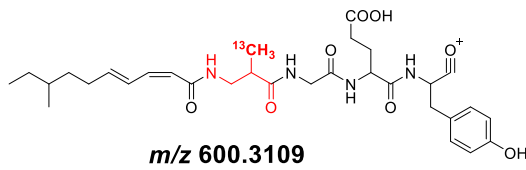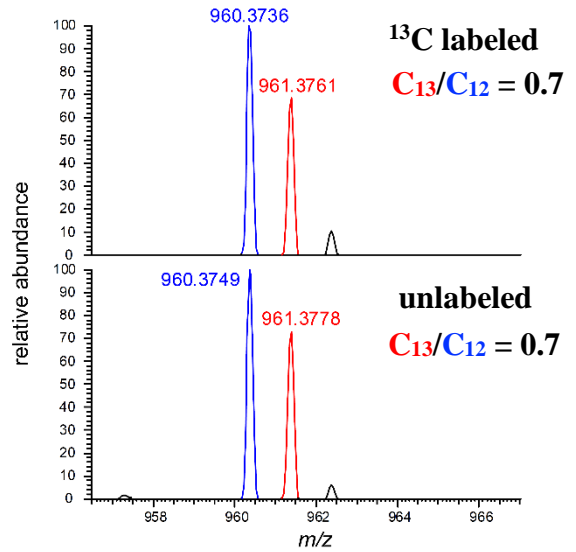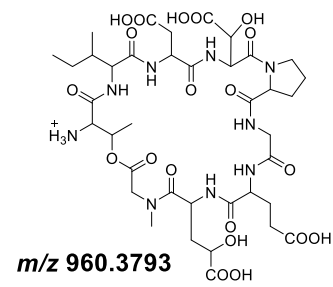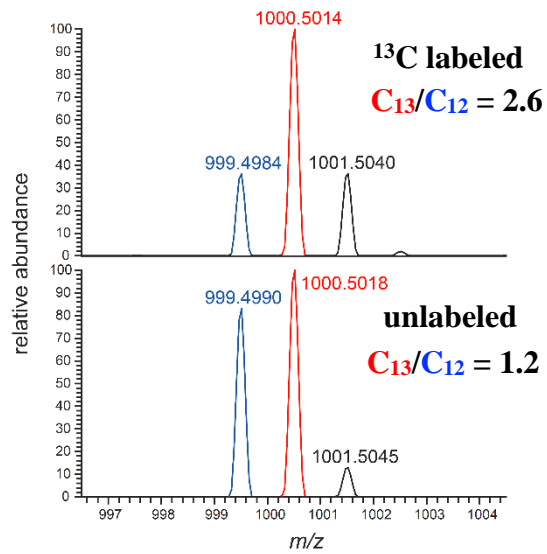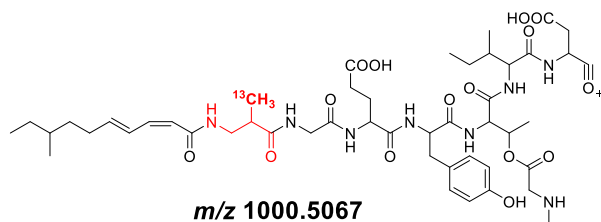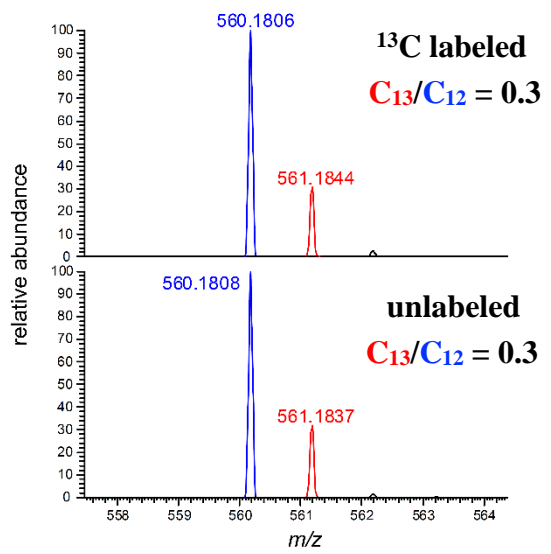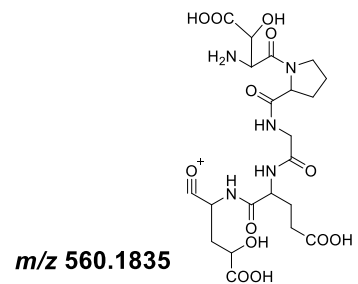

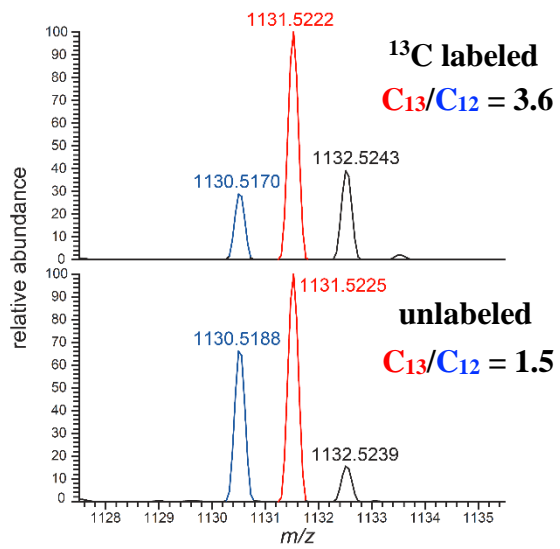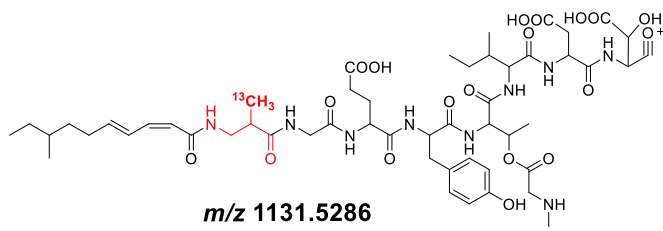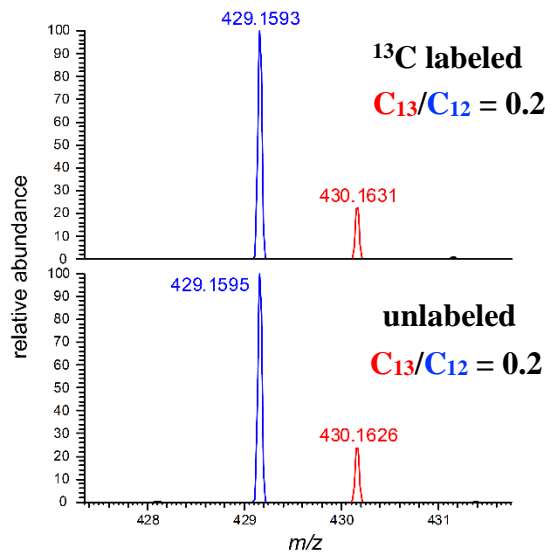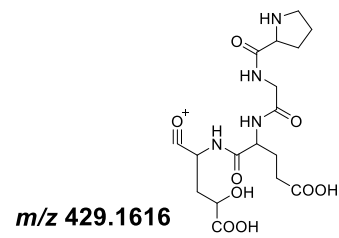

**Figure S12.** Cadaside A does not depolarize the bacterial cell membrane in a DiBAC<sub>4</sub> fluorescence assay. *S.aureus* NRS100 membrane depolarization ability of cadaside A (1), daptomycin (positive control) and vancomycin (negative control) with and without the addition of 100 mM CaCl<sub>2</sub>. The error bars represent the standard deviation of three replicates.

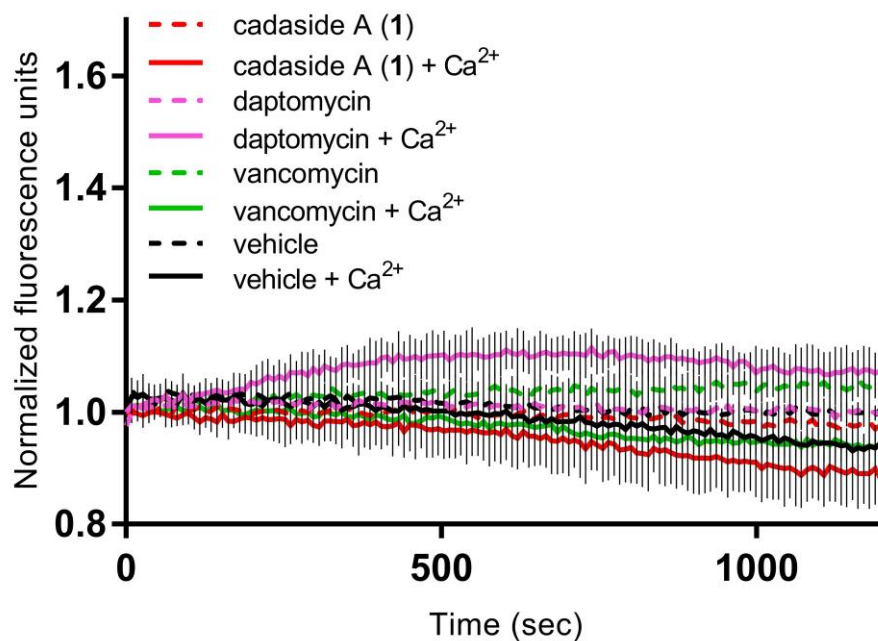



Figure S13. Chrome azurol S (CAS) assay for cadaside A, daptomycin and other siderophores.

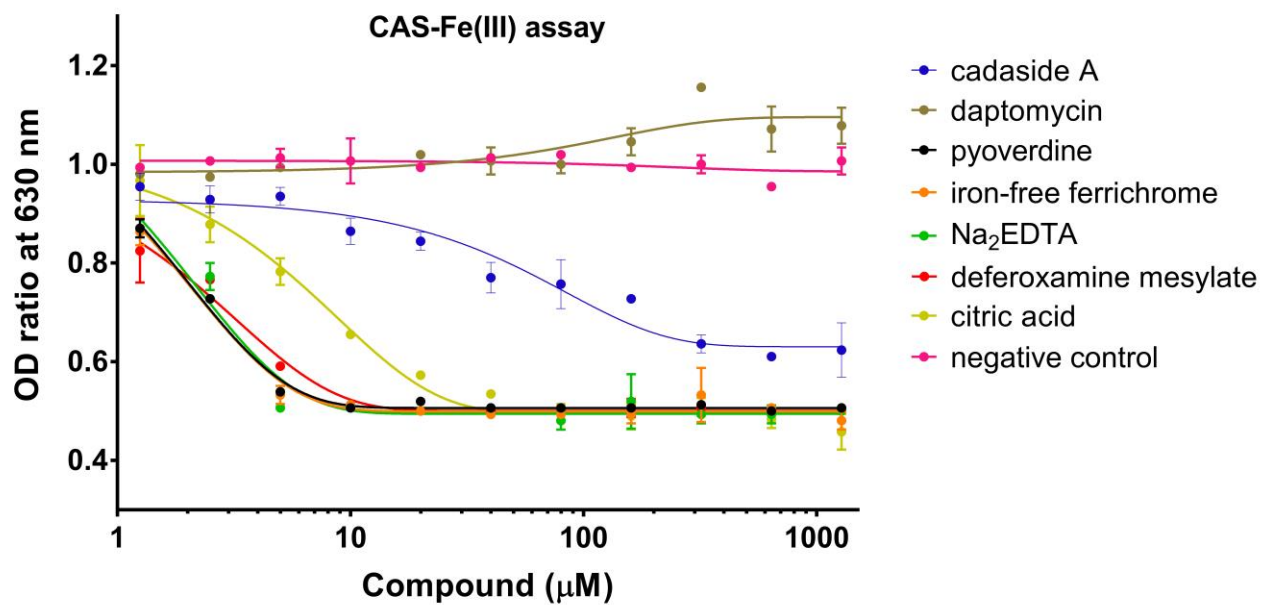

**Figure S14.**  $^1\text{H}$  NMR (600 MHz,  $\text{CD}_3\text{OD}$ ) and UV-vis spectra of cadaside A (**1**)

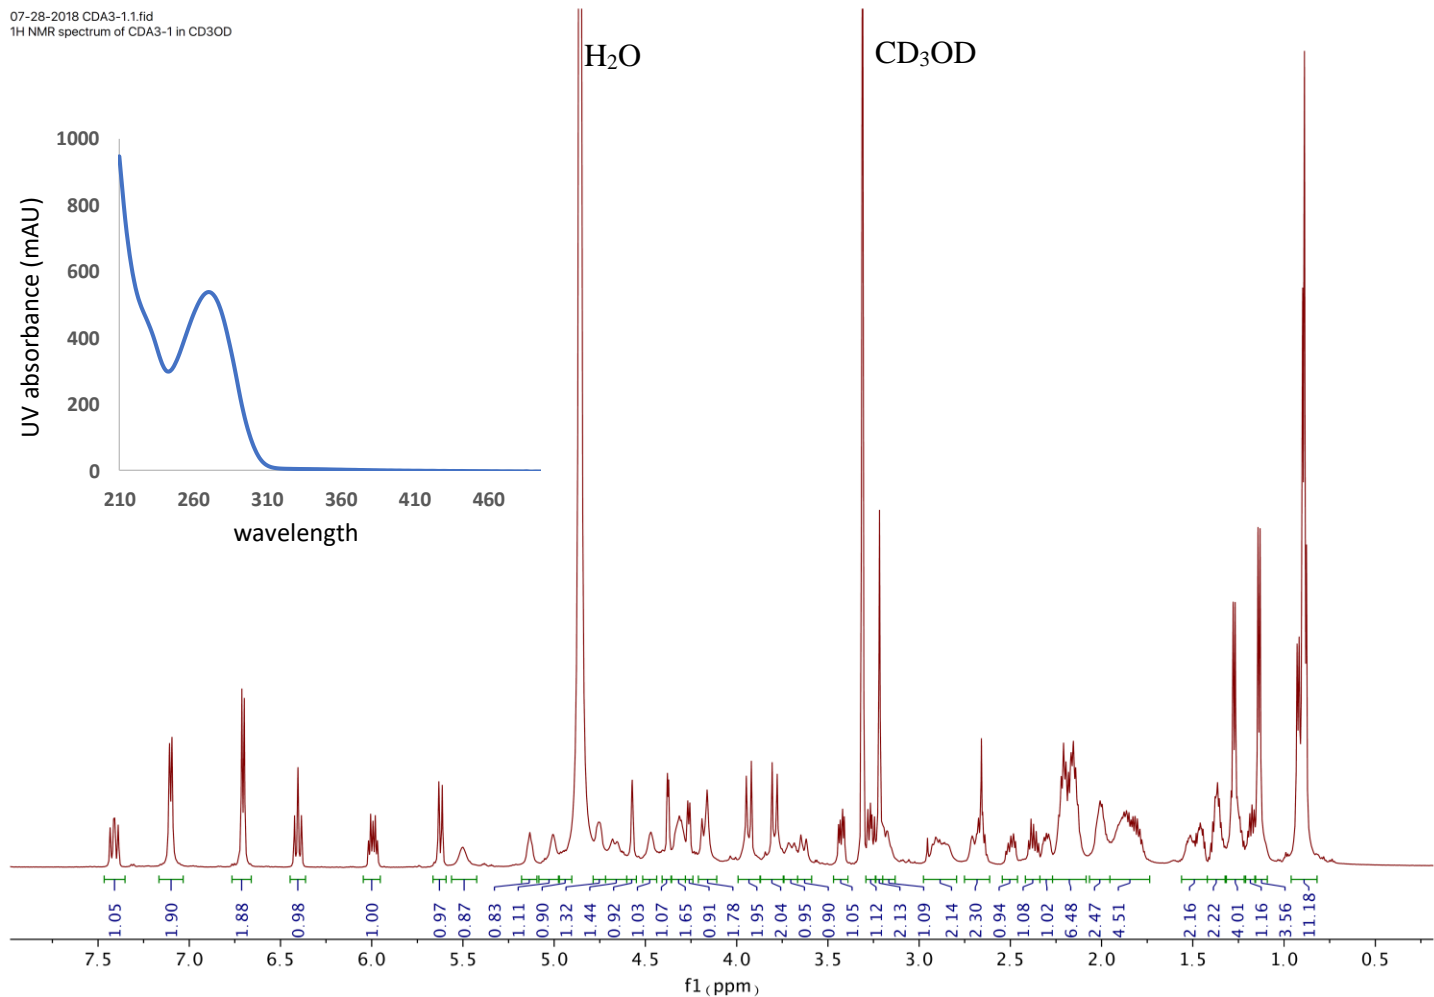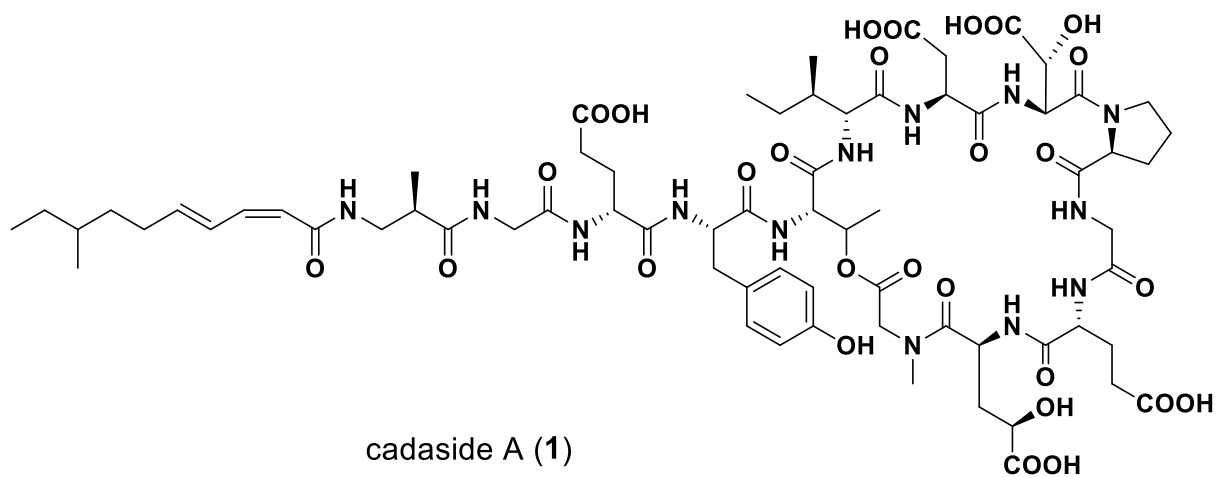

**Figure S15.**  $^{13}\text{C}$  NMR (150 MHz,  $\text{CD}_3\text{OD}$ ) spectrum of cadaside A (**1**)

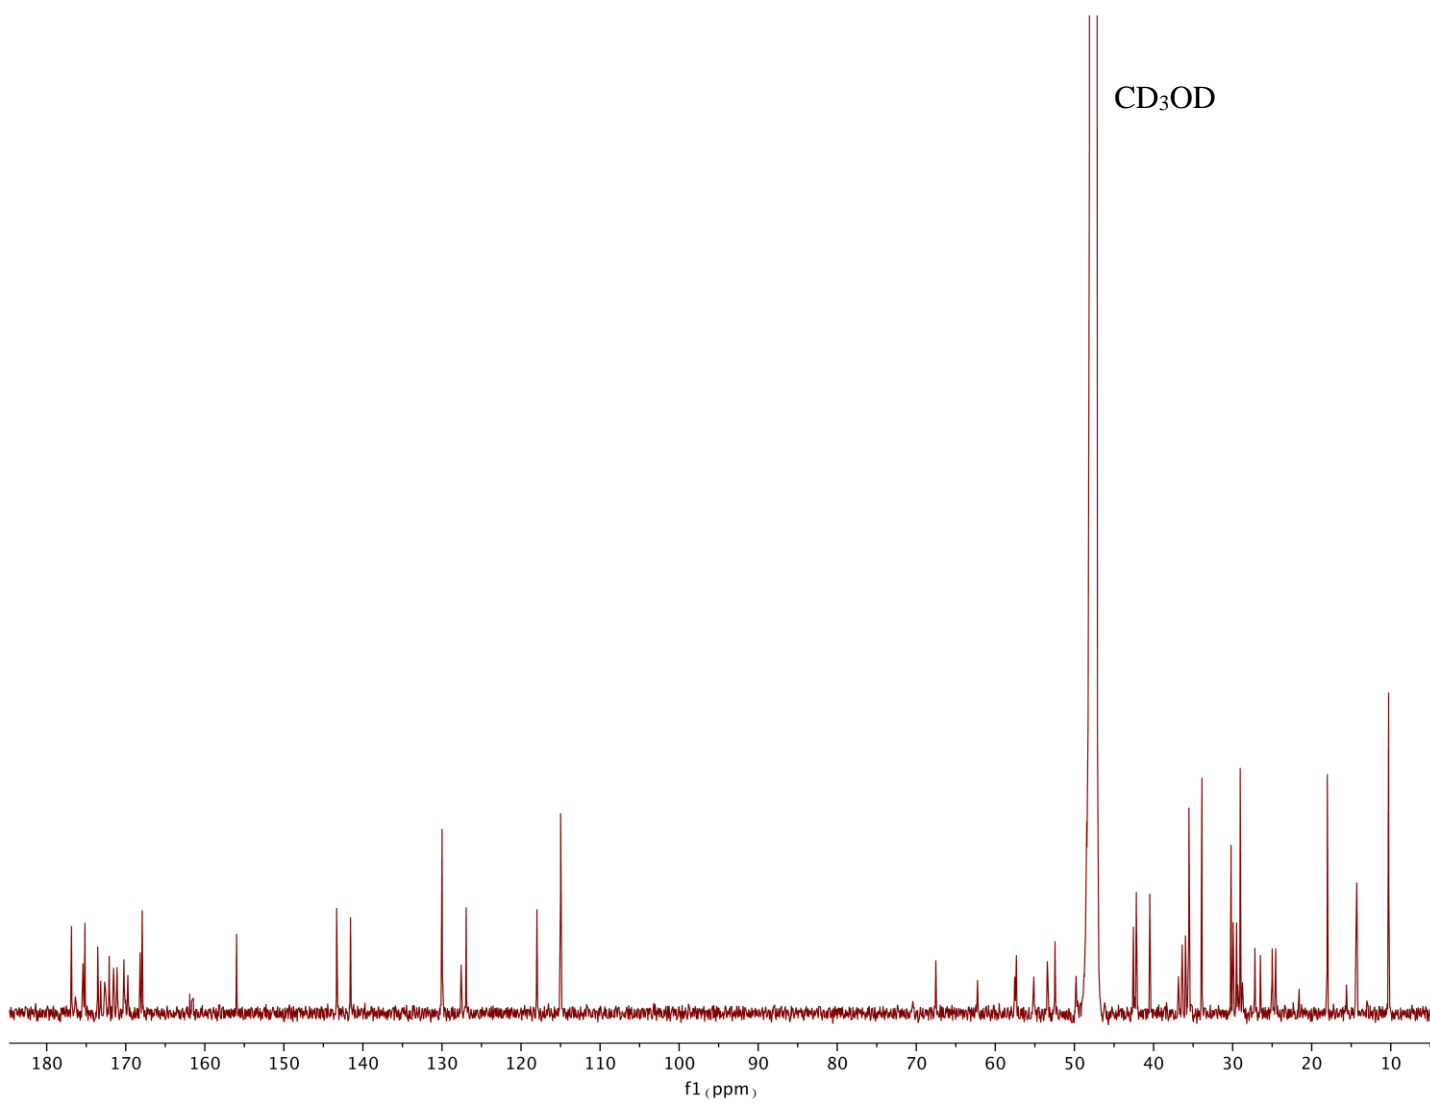

**Figure S16.**  $^1\text{H}$ - $^{13}\text{C}$  HSQC NMR (600 MHz,  $\text{CD}_3\text{OD}$ ) spectrum of cadaside A (**1**)

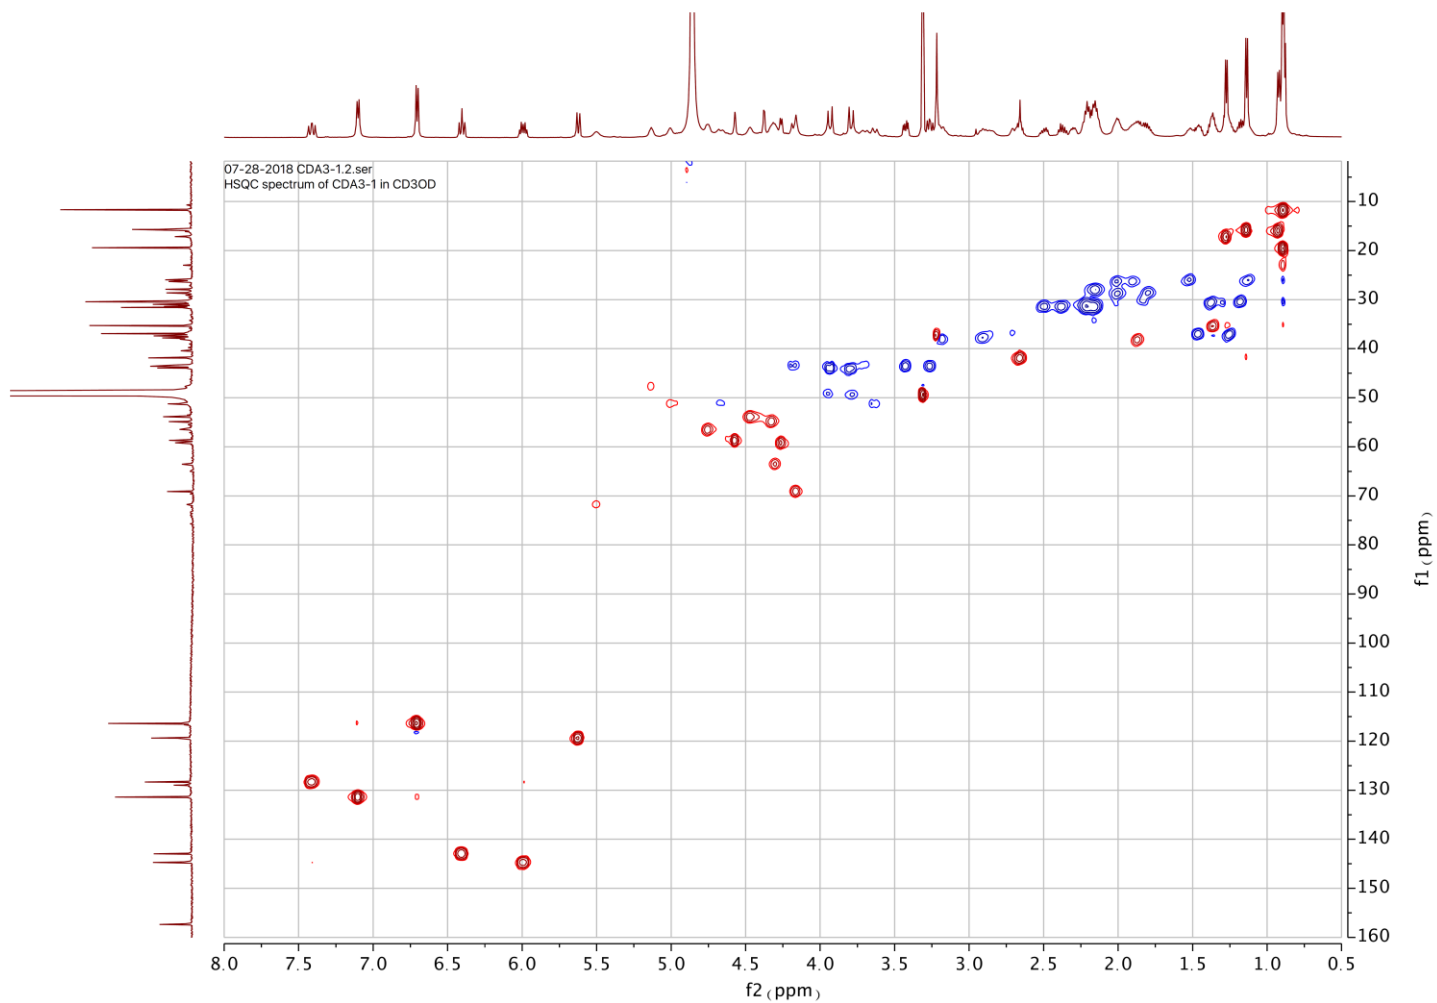

**Figure S17.**  $^1\text{H}$ - $^{13}\text{C}$  HMBC NMR (600 MHz,  $\text{CD}_3\text{OD}$ ) spectrum of cadaside A (**1**)

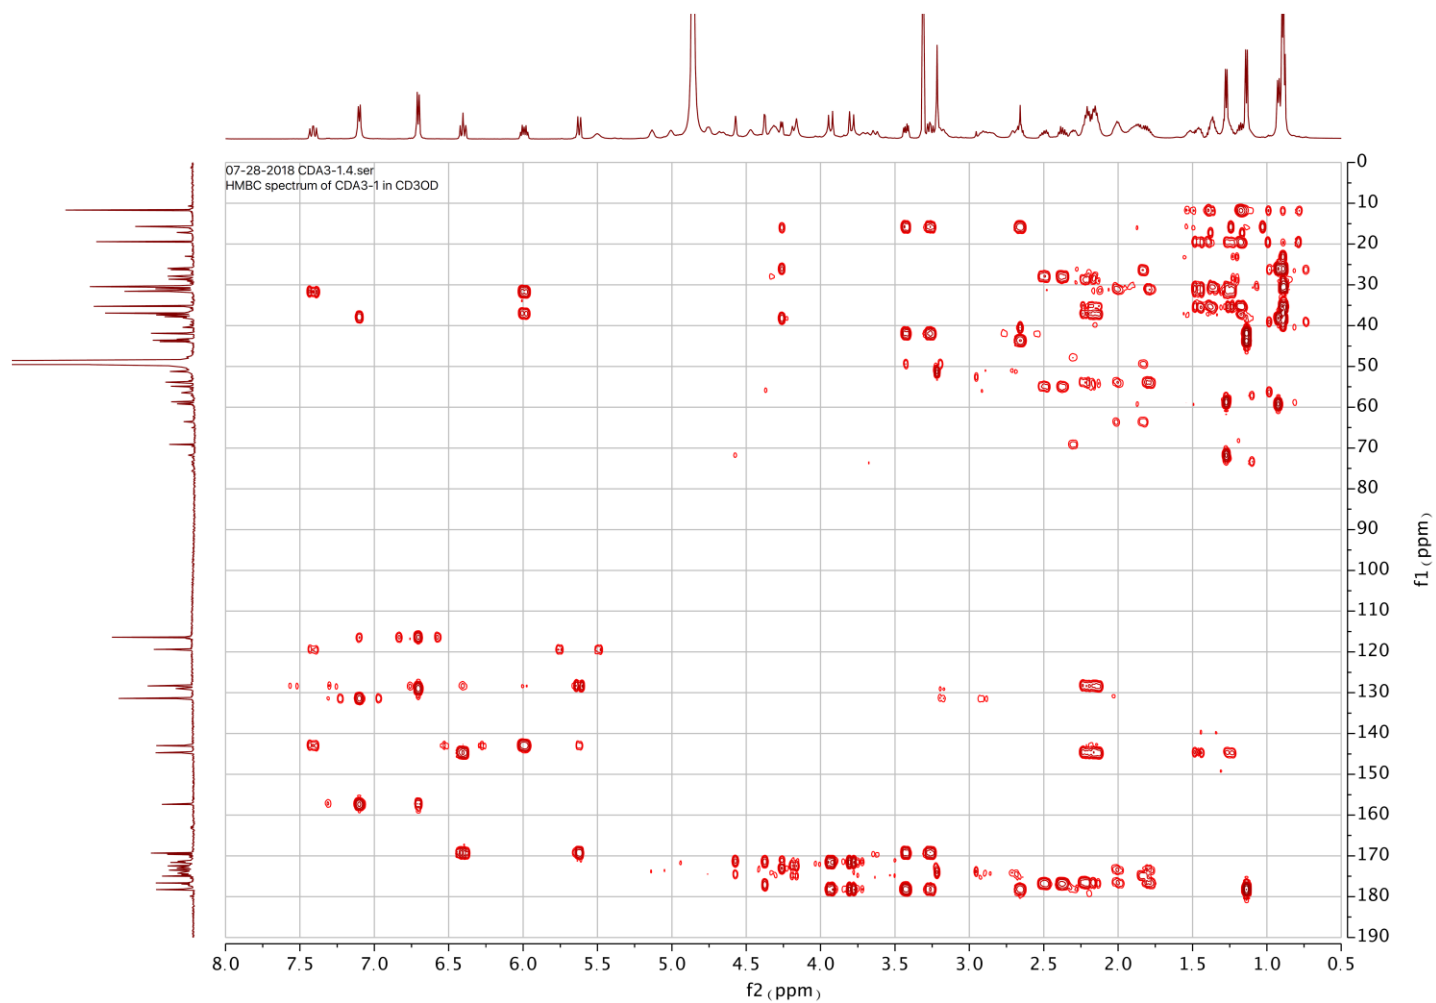

**Figure S18.**  $^1\text{H}$ - $^1\text{H}$  COSY NMR (600 MHz,  $\text{CD}_3\text{OD}$ ) spectrum of cadaside A (**1**)

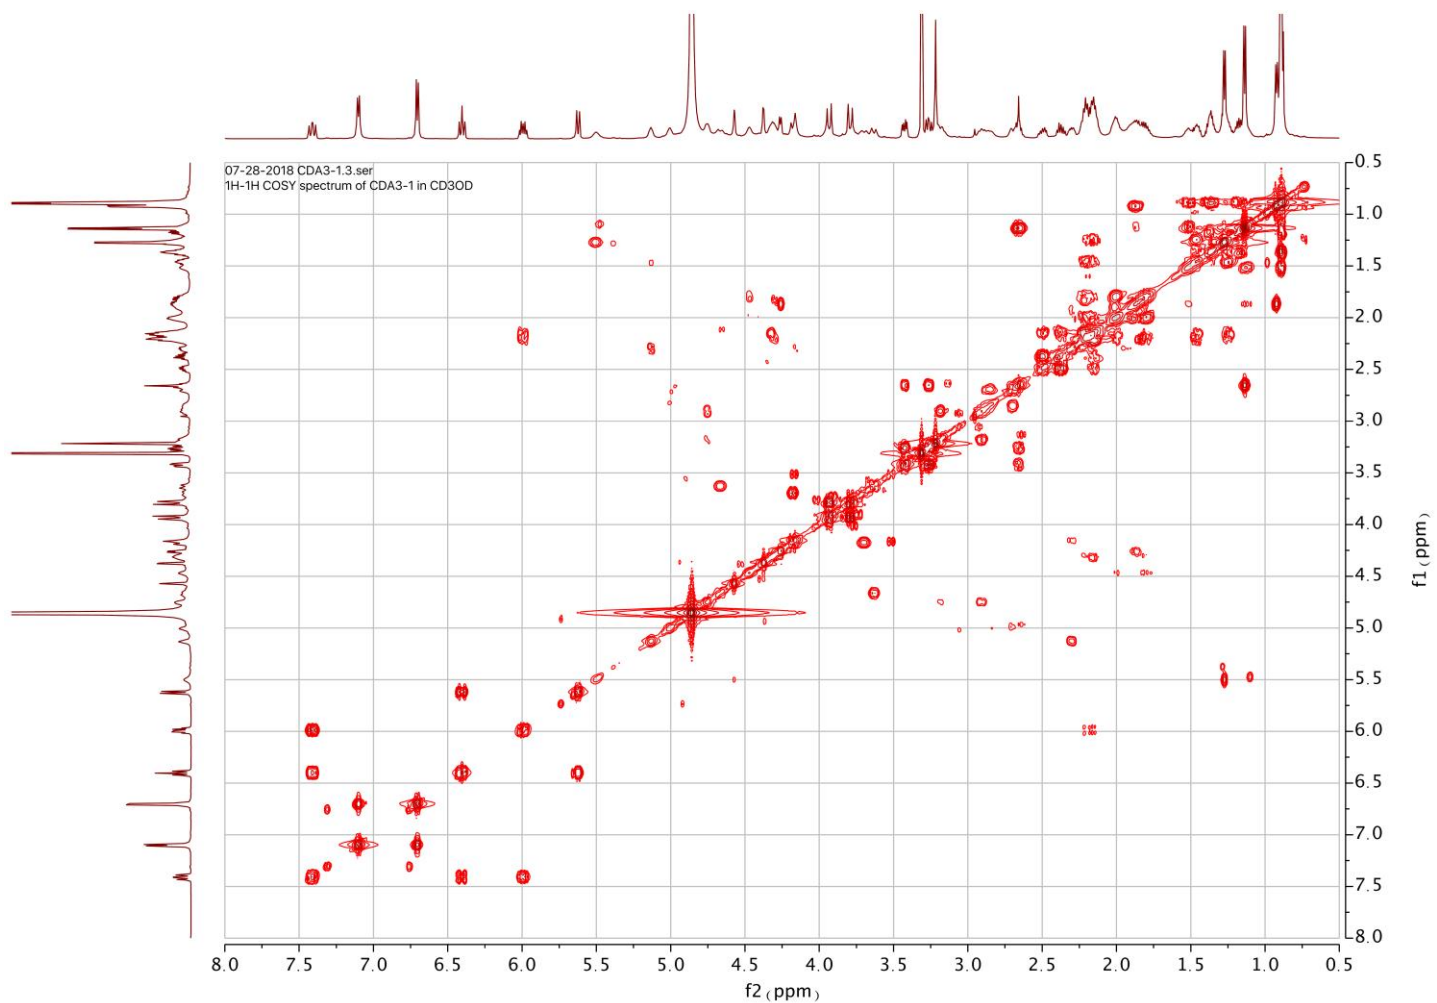

**Figure S19.**  $^1\text{H}$ - $^1\text{H}$  TOCSY NMR (600 MHz,  $\text{CD}_3\text{OD}$ ) spectrum of cadaside A (**1**)

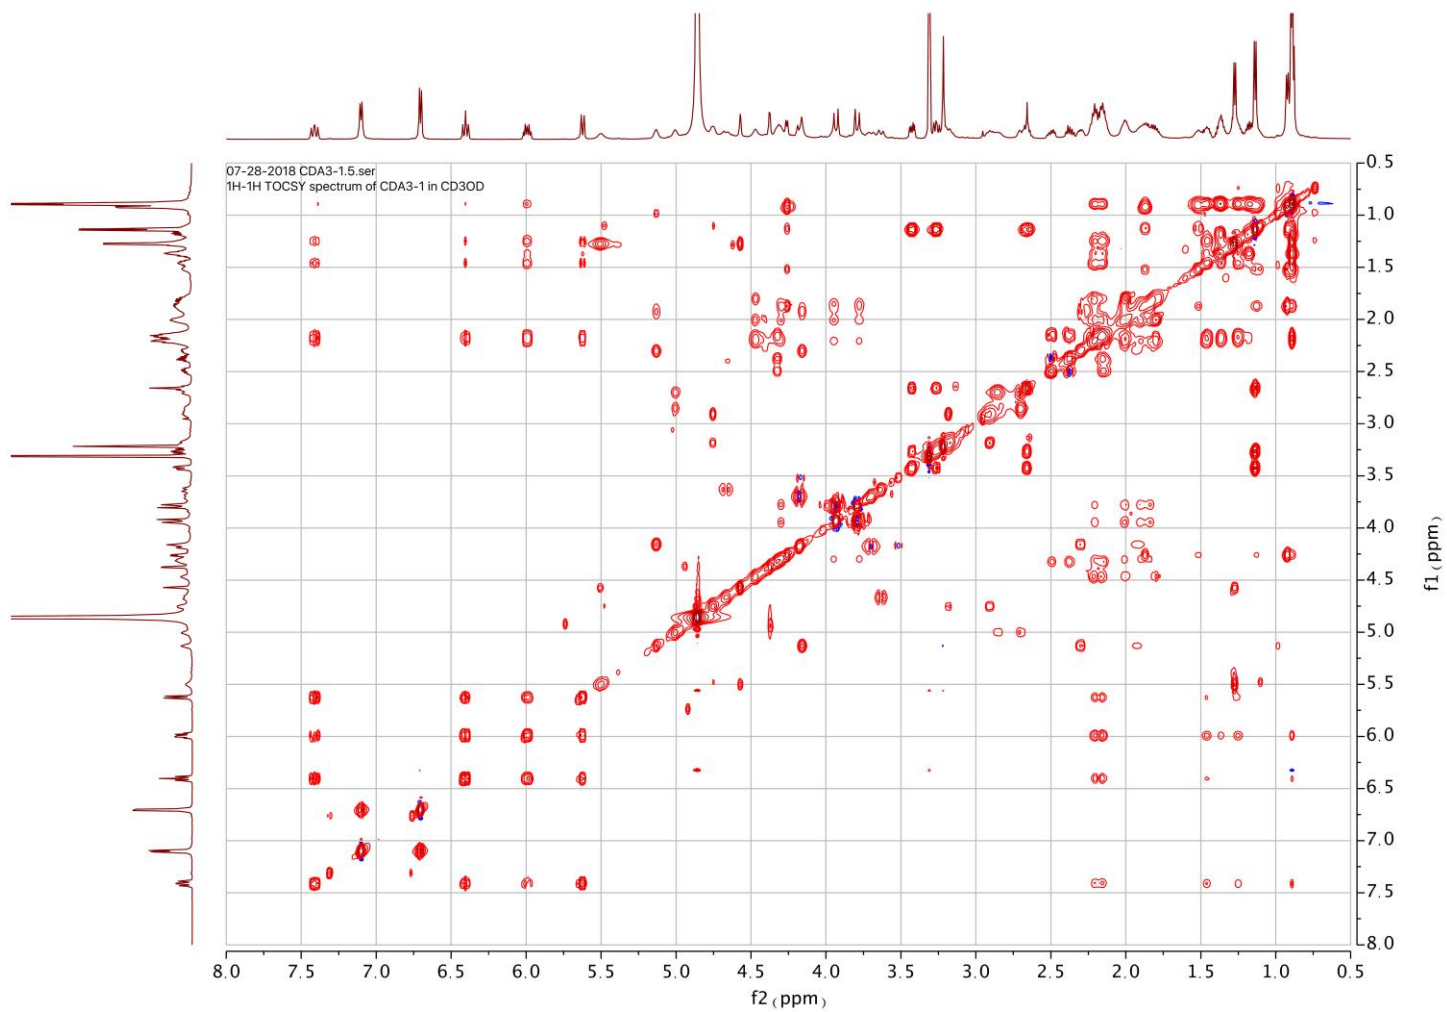

**Figure S20.**  $^1\text{H}$ - $^{13}\text{C}$  HSQC-TOCSY NMR (600 MHz,  $\text{CD}_3\text{OD}$ ) spectrum of cadaside A (**1**)

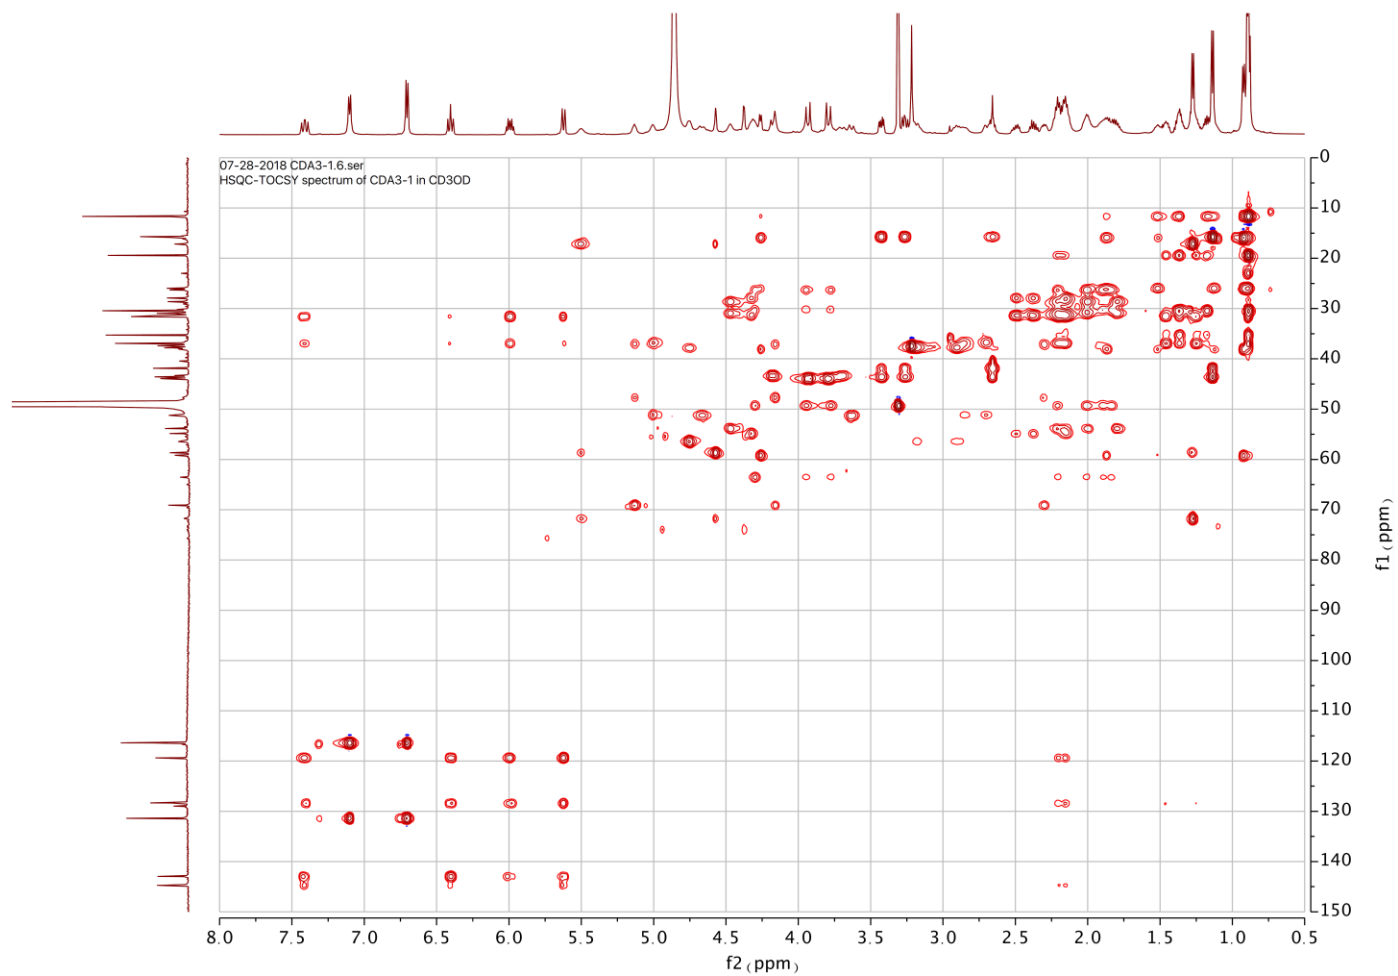



**Figure S21.**  $^1\text{H}$ - $^1\text{H}$  ROESY NMR (600 MHz,  $\text{CD}_3\text{OD}$ ) spectrum of cadaside A (**1**)

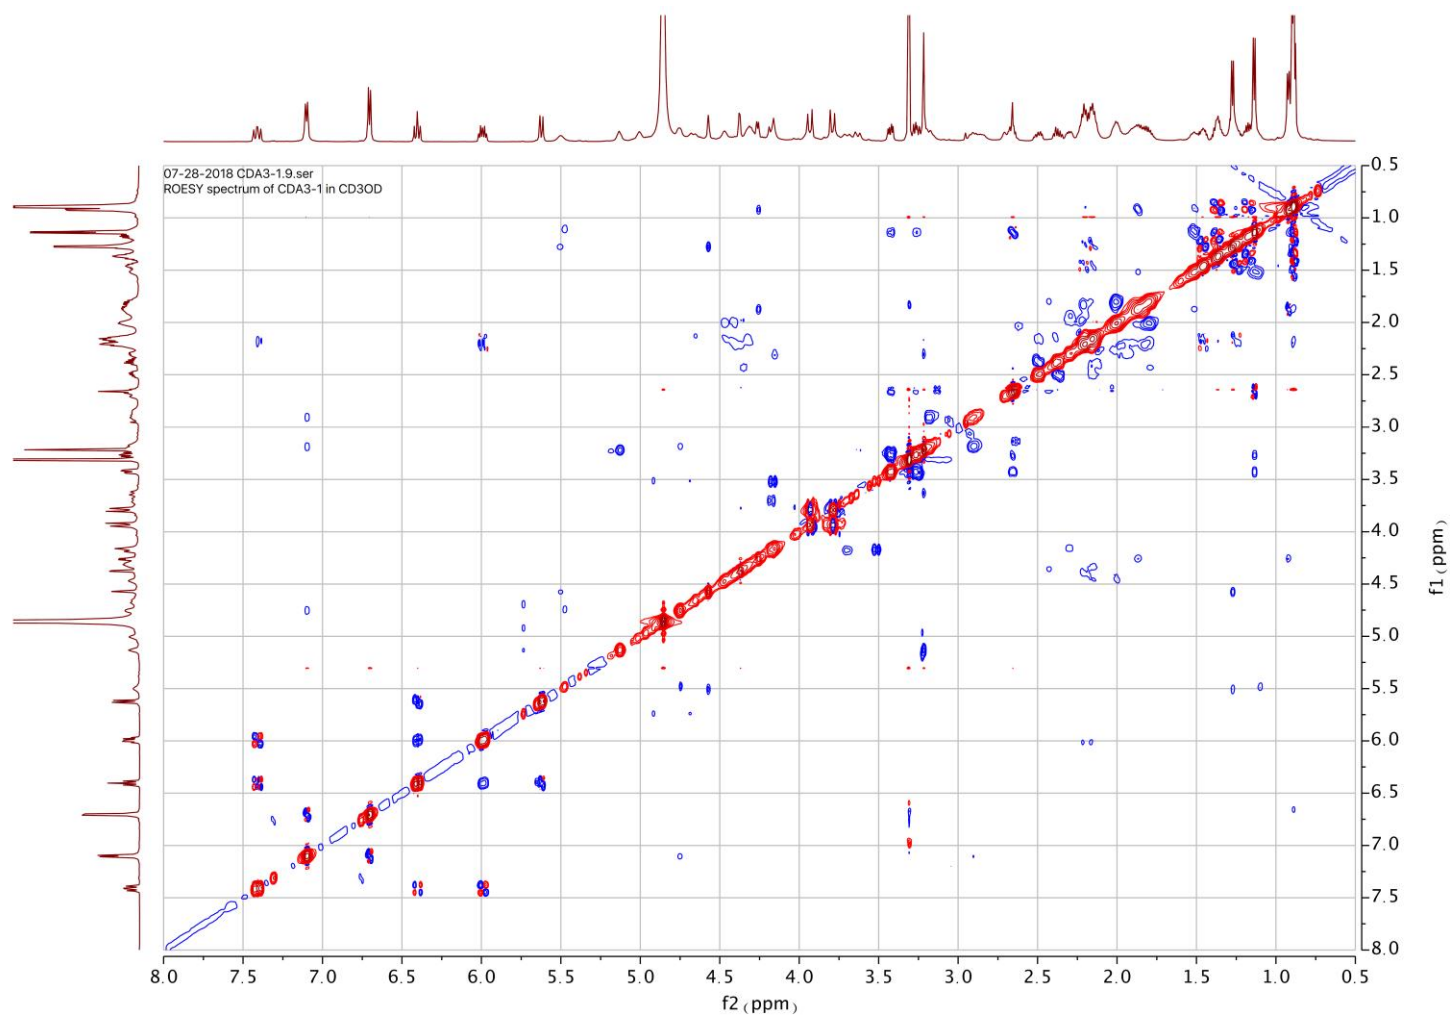



**Figure S23.**  $^{13}\text{C}$  NMR (150 MHz,  $\text{CD}_3\text{OD}$ ) spectrum of cadaside B (**2**)

08-04-2018 CDA3-2.8.fid  
 $^{13}\text{C}$  NMR spectrum of CDA3-2 in  $\text{CD}_3\text{OD}$

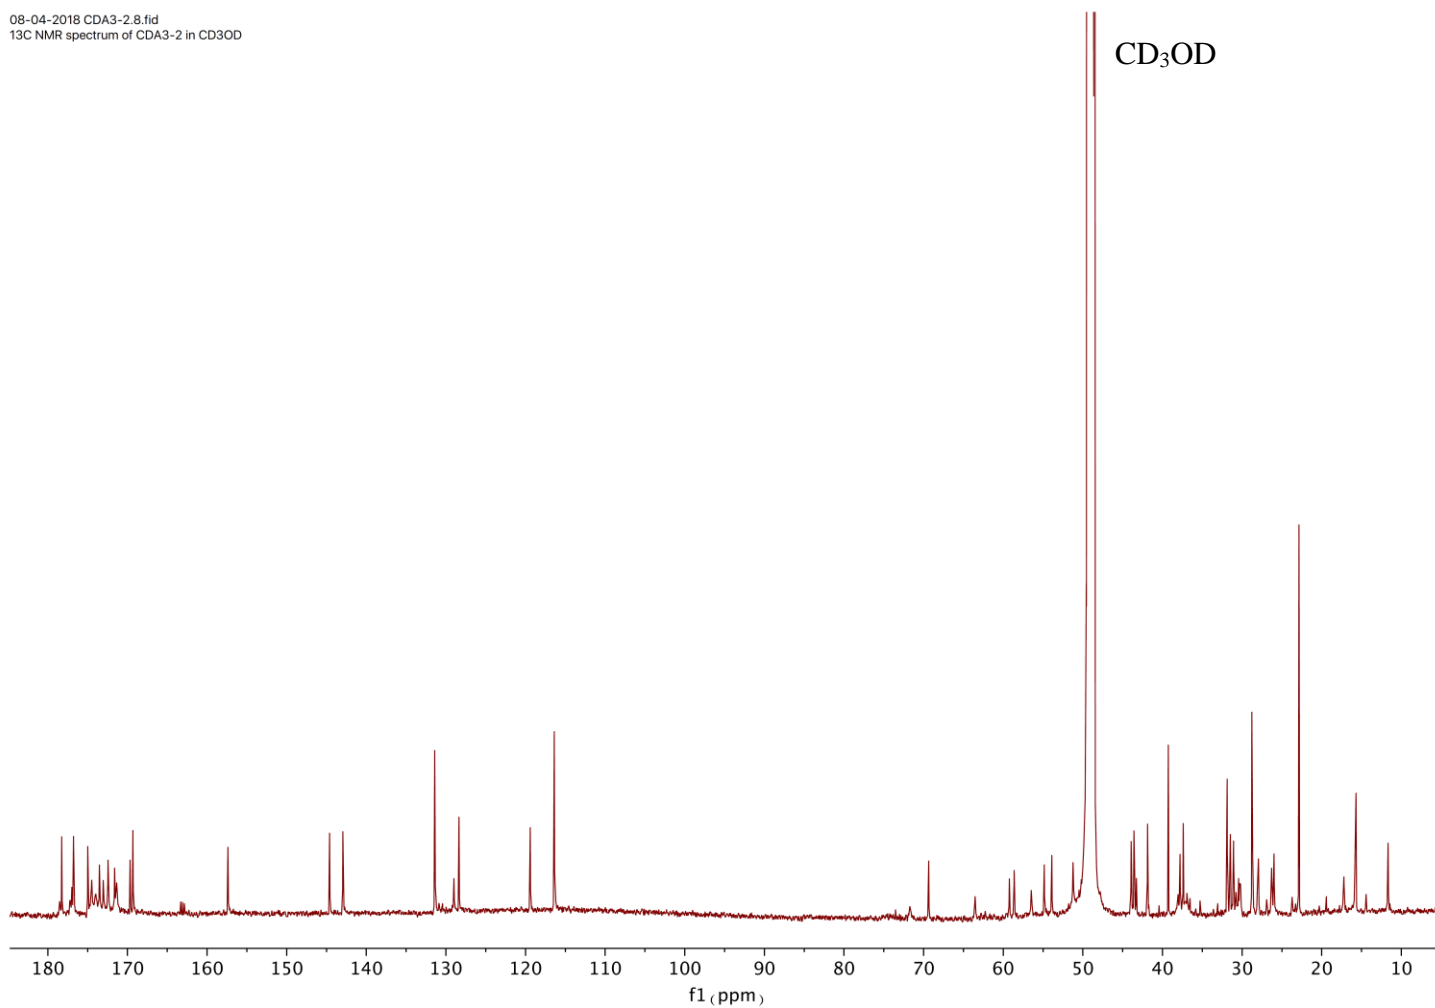

**Figure S24.**  $^1\text{H}$ - $^{13}\text{C}$  HSQC NMR (600 MHz,  $\text{CD}_3\text{OD}$ ) spectrum of cadaside B (**2**)

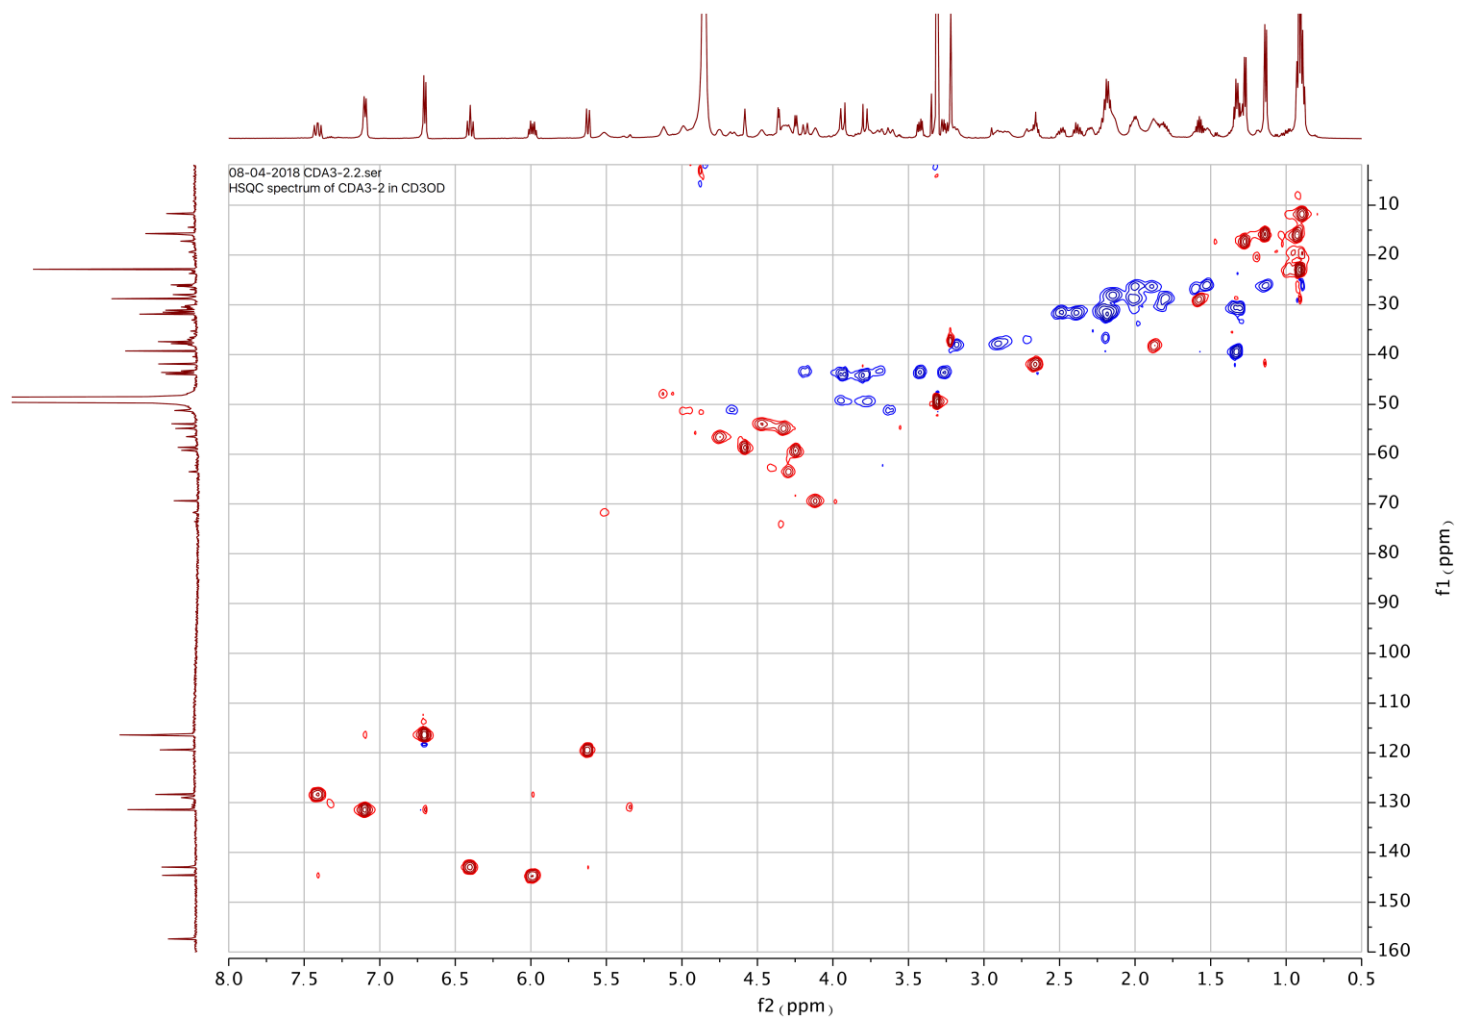

**Figure S25.**  $^1\text{H}$ - $^{13}\text{C}$  HMBC NMR (600 MHz,  $\text{CD}_3\text{OD}$ ) spectrum of cadaside B (2)

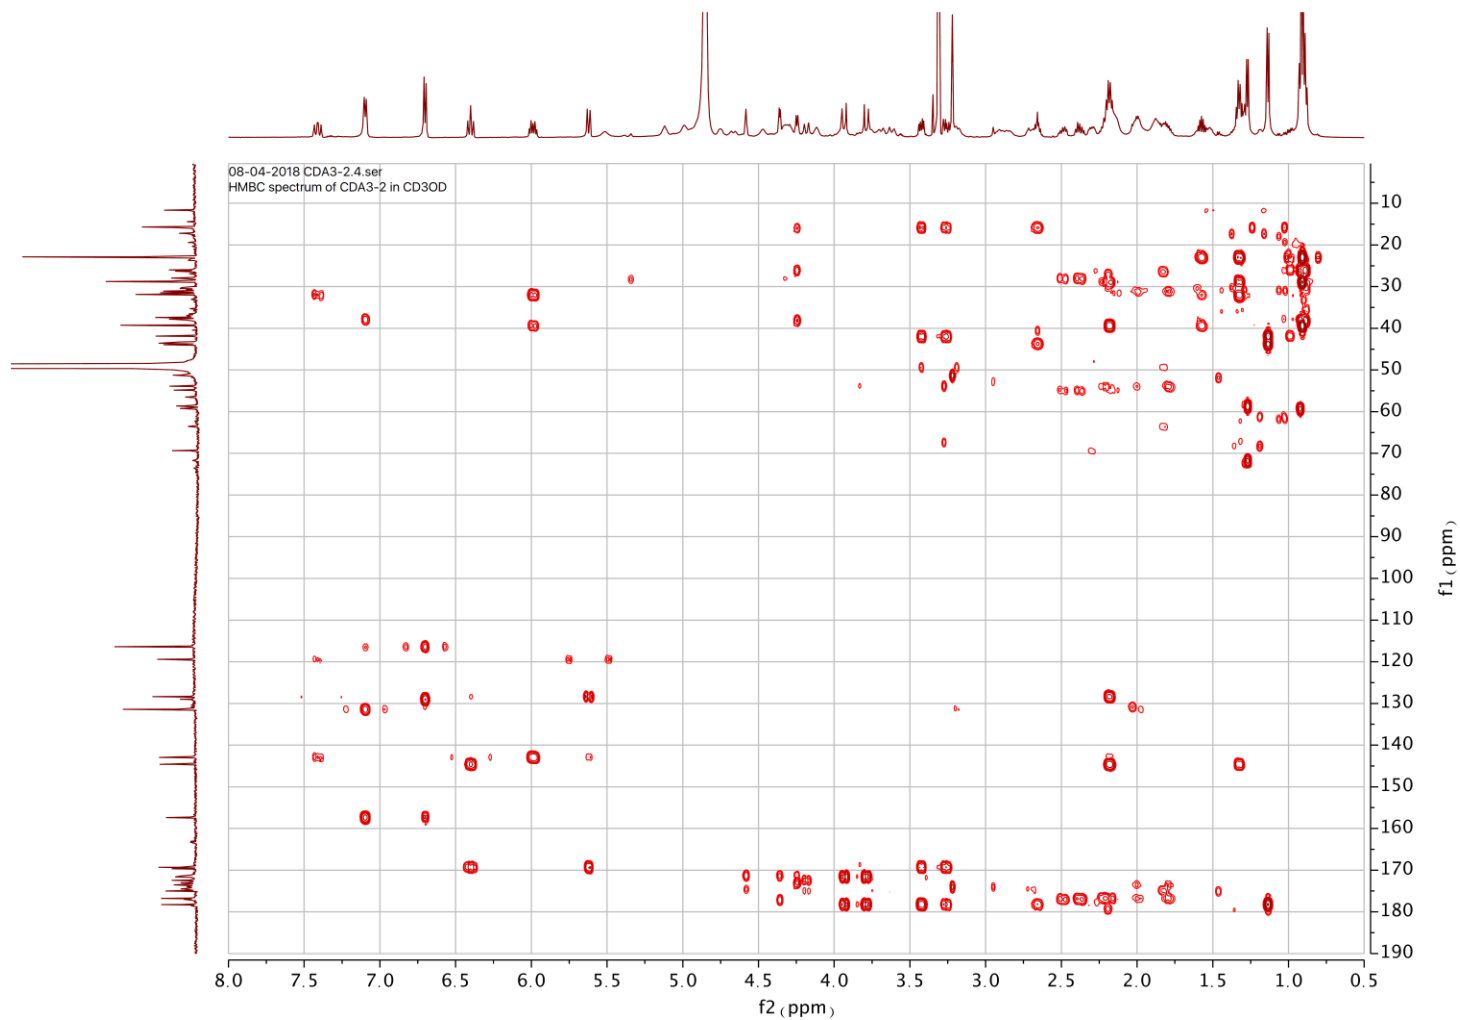

**Figure S26.**  $^1\text{H}$ - $^1\text{H}$  COSY NMR (600 MHz,  $\text{CD}_3\text{OD}$ ) spectrum of cadaside B (**2**)

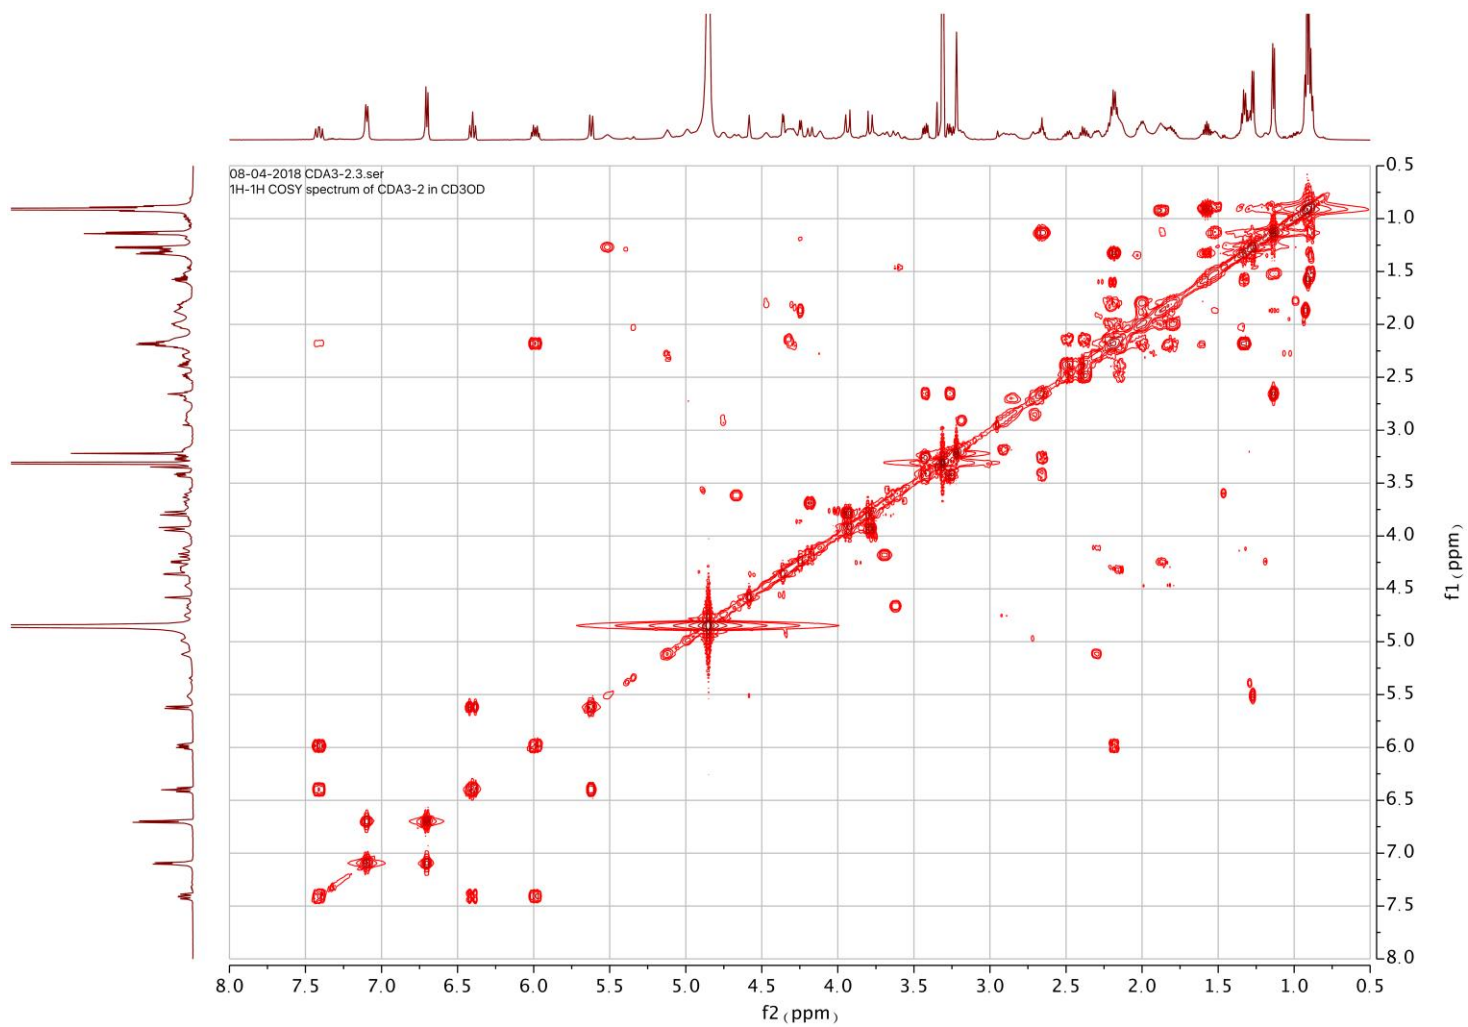

**Figure S27.**  $^1\text{H}$ - $^1\text{H}$  TOCSY NMR (600 MHz,  $\text{CD}_3\text{OD}$ ) spectrum of cadaside B (2)

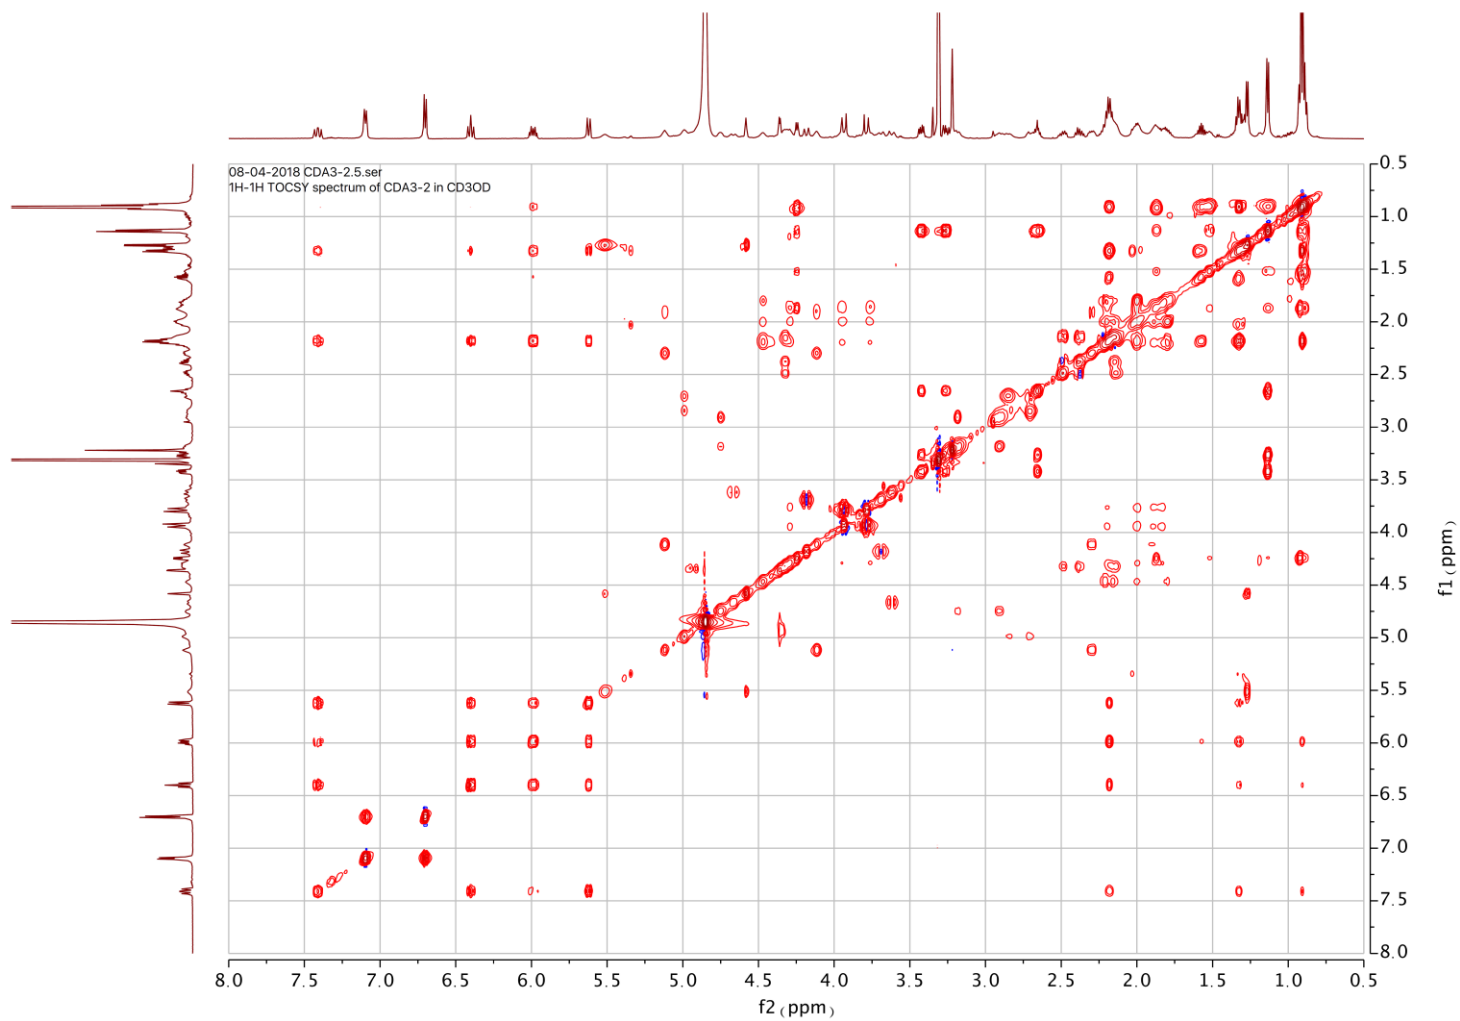

**Figure S28.**  $^1\text{H}$ - $^{13}\text{C}$  HSQC-TOCSY NMR (600 MHz,  $\text{CD}_3\text{OD}$ ) spectrum of cadaside B (**2**)

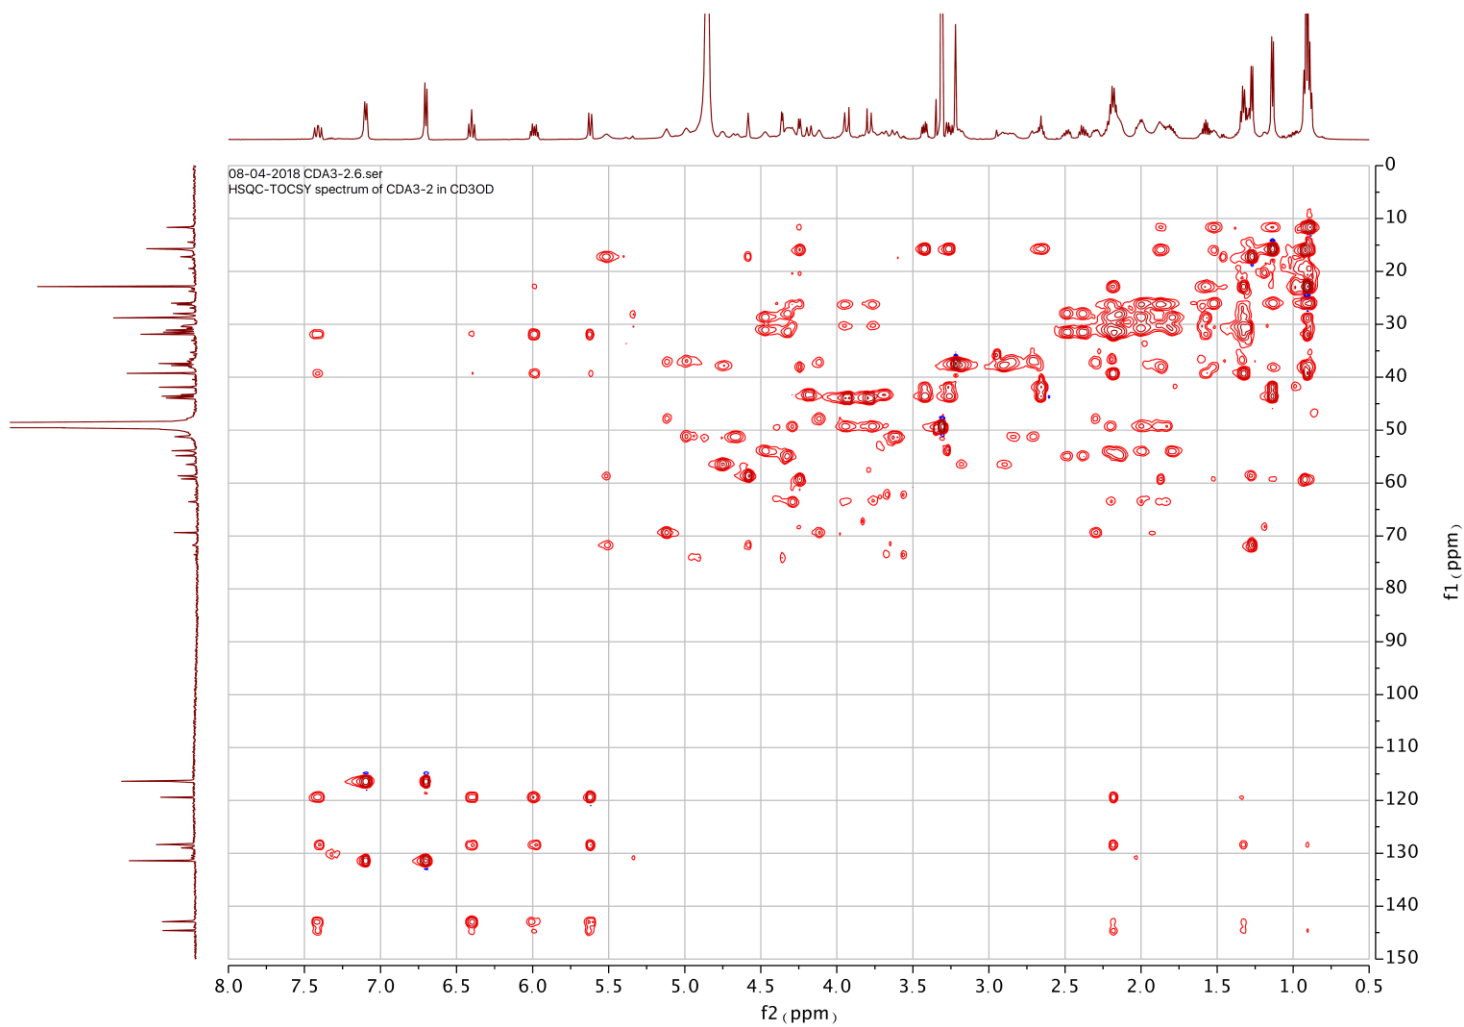



**Figure S29.**  $^1\text{H}$ - $^1\text{H}$  ROESY NMR (600 MHz,  $\text{CD}_3\text{OD}$ ) spectrum of cadaside B (2)

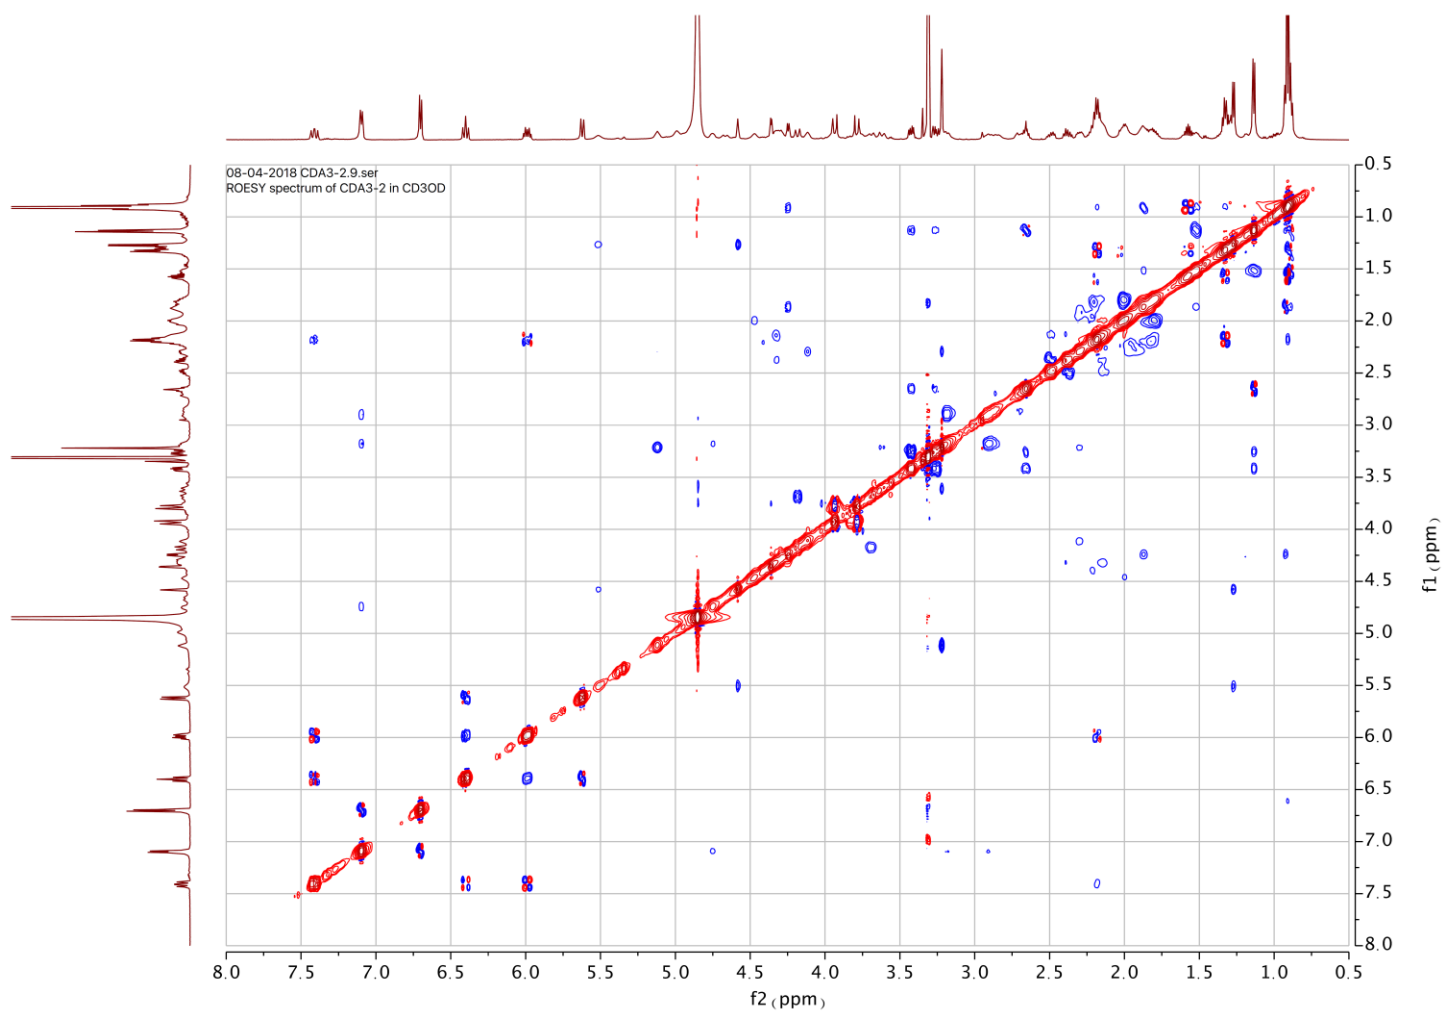

## References

- (1) Carmichael, J.; Degraff, W. G.; Gazdar, A. F.; Minna, J. D.; Mitchell, J. B. Evaluation of a Tetrazolium-Based of Semiautomated Colorimetric Assay : Assessment of Chemosensitivity Testing. *Cancer Reserach* **1987**, *47*, 936–942.
- (2) Schneider, T.; Gries, K.; Josten, M.; Wiedemann, I.; Pelzer, S.; Labischinski, H.; Sahl, H. G. The Lipopeptide Antibiotic Friulimicin B Inhibits Cell Wall Biosynthesis through Complex Formation with Bactoprenol Phosphate. *Antimicrob. Agents Chemother.* **2009**, *53* (4), 1610–1618.
- (3) Schwyn, B.; Neilands, J. B. Universal Chemical Assay for the Detection and Determination of Siderophore. *Anal. Biochem.* **1987**, *160*, 47–56.
- (4) Zhang, F.; Barns, K.; Hoffmann, F. M.; Braun, D. R.; Andes, D. R.; Bugni, T. S. Thalassosamide, a Siderophore Discovered from the Marine-Derived Bacterium *Thalassospira profundimaris*. *J. Nat. Prod.* **2017**, *80* (9), 2551–2555.
- (5) Fujii, K.; Harada, K. I. A Nonempirical Method Using LC/MS for Determination of the Absolute Configuration of Constituent Amino Acids in a Peptide: Combination of Marfey's Method with Mass Spectrometry and Its Practical Application. *Anal. Chem.* **1997**, *69* (24), 5146–5151.
- (6) Owen, J. G.; Reddy, B. V. B.; Ternei, M. A.; Charlop-Powers, Z.; Calle, P. Y.; Kim, J. H.; Brady, S. F. Mapping Gene Clusters within Arrayed Metagenomic Libraries to Expand the Structural Diversity of Biomedically Relevant Natural Products. *Proc. Natl. Acad. Sci.* **2013**, *110* (29), 11797–11802.
- (7) Owen, J. G.; Charlop-Powers, Z.; Smith, A. G.; Ternei, M. A.; Calle, P. Y.; Reddy, B. V. B.; Montiel, D.; Brady, S. F. Multiplexed Metagenome Mining Using Short DNA Sequence Tags Facilitates Targeted Discovery of Epoxyketone Proteasome Inhibitors. *Proc. Natl. Acad. Sci.* **2015**, *112* (14), 4221–4226.
- (8) Kreutzer, M. F.; Kage, H.; Nett, M. Structure and Biosynthetic Assembly of Cupriachelin, a Photoreactive Siderophore from the Bioplastic Producer *Cupriavidus Necator* H16. *J. Am. Chem. Soc.* **2012**, *134* (11), 5415–5422.
- (9) Kohonen, T.; Curry, B.; Davies, F.; Phillips, P.; Evans, M. Mechanistic and Structural Basis of Stereospecific C<sub>β</sub>-Hydroxylation in Calcium-Dependent Antibiotic, a Daptomycin-Type Lipopeptide. *ACS Chem. Biol.* **2007**, *2*, 187–196.
- (10) Li, Q.; Qin, X.; Liu, J.; Gui, C.; Wang, B.; Li, J.; Ju, J. Deciphering the Biosynthetic Origin of L-allo-Isoleucine. *J. Am. Chem. Soc.* **2016**, *138* (1), 408–415.
- (11) Fink, K.; Cline, R. E.; Henderson, R. B.; Fink, R. M. Metabolism of Thymine by Rat Liver *in vitro*. *J. Biol. Chem.* **1956**, *221*, 425–433.
- (12) van KUILENBURG, A. B. P.; STROOMER, A. E. M.; van LENTHE, H.; ABELING, N. G. G. M.; van GENNIP, A. H. New Insights in Dihydropyrimidine Dehydrogenase Deficiency: A Pivotal Role for Beta-Aminoisobutyric Acid? *Biochem. J.* **2004**, *379* (1), 119–124.
- (13) Kim, S.; West, T. P. Pyrimidine Catabolism in *Pseudomonas aeruginosa*. *FEMS Microbiol Lett* **1991**, *61* (2–3), 175–179.
